# Supplementary material
Source: PubMed Central journal article supplement (PMC4200394)
Supplement: NIHMS330622-supplement-supplementary_online_materials.pdf [file NIHMS330622-supplement-supplementary_online_materials.pdf]

# Supplementary Information Titles

**Journal:** Nature Medicine

|                              |                                                              |
|------------------------------|--------------------------------------------------------------|
| <b>Article Title:</b>        | <b>Host mediated regulation of superinfection in malaria</b> |
| <b>Corresponding Author:</b> | Maria M. Mota                                                |

| <b>Supplementary Item &amp; Number</b> | <b>Title or Caption</b>                                                                                                                                                  |
|----------------------------------------|--------------------------------------------------------------------------------------------------------------------------------------------------------------------------|
| Supplementary Figure 1                 | Inhibition of <i>Plasmodium</i> liver infection by an ongoing malaria blood-stage infection results in small EEFs that fail to develop.                                  |
| Supplementary Figure 2                 | Infection of both mouse primary hepatocytes and hepatoma cells by <i>P. berghei</i> sporozoites is unaffected by co-culture with iRBCs.                                  |
| Supplementary Figure 3                 | No support for a role of adaptive immunity or aspects of innate immunity in inhibition of <i>Plasmodium</i> liver infection by an ongoing malaria blood-stage infection. |
| Supplementary Figure 4                 | Reduced level of apoptosis observed in <i>P. berghei</i> NK65 blood-stage infected caspase-3 deficient mice.                                                             |
| Supplementary Figure 5                 | Hepcidin, Id1 and iron and malaria infections.                                                                                                                           |
| Supplementary Figure 6                 | Model predictions for age-related incidence and multiplicity of infections.                                                                                              |
| Supplementary Table 1                  | Differentially expressed (DE) transcripts during blood-stage, liver stage or Reinfection.                                                                                |
| Supplementary Methods                  | Methods                                                                                                                                                                  |

## Supplementary Material - Methods

**Real time *in vivo* imaging luminescent *Plasmodium*.** Naïve mice (control) and blood stage infected (PbA in Fig. 1A and PbNK in Fig. 1B and Fig. 1C), were intra-peritoneally injected with 200µl of anaesthesia mixture (80 mg/kg Ketamine and 10 mg/kg Xylazine) diluted in PBS in order to allow each mouse exposure to 15 *Anopheles* mosquitoes infected with luciferase expressing *P. berghei* (parasite line 354cl4). After 30 minutes of mosquito bites, mice were shaved in the abdomen. Forty h post-infection for Fig. 1A and 1B and 6 days post-infection for Fig. 1C, D-luciferin dissolved in PBS (150 mg/kg; Caliper Life Sciences, USA) was injected subcutaneously in the neck. Animals were anesthetized again as described above for the whole duration of measurements (performed within 5 to 10 minutes after the injection of D-luciferin). Bioluminescence imaging was acquired with a 12.5 cm field of view (FOV), medium binning factor and an exposure time of 180 seconds. Luciferase activity in animals was visualized through imaging of whole bodies using the *in vivo* IVIS® Lumina Imaging System <sup>1</sup>.

**qReal-Time PCR quantification of liver infection.** Livers were collected and homogenized in denaturing solution (4 M guanidine thiocyanate; 25mM sodium citrate pH 7, 0.5% N-Lauroylsarcosine and, 0.7% β-Mercaptoethanol in DEPC-treated water). Total RNA was extracted using RNeasy Mini kit (Qiagen), and then reverse transcribed into cDNA using Transcriptor First Strand cDNA Synthesis kit (Roche), according to the manufacturers' protocols. Infection load in the liver was determined as previously described by qRT-PCR using classic PbA 18S *rRNA* <sup>2</sup> specific primers or *gfp* specific primers (*gfp* expression correlates with PbA 18S *rRNA*, fig. S1). qRT-PCR reactions used Power SYBR Green PCR Master Mix (Applied Biosystems) and were performed according to the manufacturer's instructions on an ABI Prism 7000 system (Applied Biosystems). Relative amounts of PbA 18S *rRNA* and *gfp* mRNA were calculated against the Hypoxanthine Guanine Phosphoribosyltransferase (*hprt*) housekeeping gene, following a prime denaturation of 10 minutes at 95°C, then 50 cycles of 95°C for 15 seconds and 60°C for 1 minute. PbA 18S *rRNA*, *gfp* and *hprt* specific primer sequences were:

5'-CGG CTT AAT TTG ACT CAA CAC G-3' and 5'-TTA GCA TGC CAG AGT CTC GTT C-3' for PbA 18S *rRNA*, 5'- GTC AGT GGA GAG GGT GAA GG- 3' and 5' – ACT TCA GCA CGT GTC TTG TAG TTC – 3' for *gfp* and 5' – TGC TCGAGA TGT GAT GAA GG – 3' and 5' – TCC CCT GTT GAC TGG TCA TT – 3' for mouse *hprt*. External standardization was performed using plasmids encoding the full-length genes cDNA cloned in TOPO TA (Invitrogen).

**Chloroquine treatment.** Mice infected 4 days previously with *P. berghei* NK65 and control mice received 0.8 mg of chloroquine (CQ) by intra-peritoneal injection for 1 or 2 days before re-infection, a protocol leading to decrease in peripheral blood parasitaemia until zero by day 2 of treatment.

**Cells.** Huh7 cells, a human hepatoma cell line, were cultured in RPMI (Gibco/Invitrogen) medium supplemented with 10% fetal calf serum (FCS, Gibco/Invitrogen), 1% penicillin/streptomycin (pen/strep, Gibco/Invitrogen), 1% glutamine (Gibco/Invitrogen) at pH 7 and maintained at 37°C with 5% CO<sub>2</sub>.

**Isolation of murine primary hepatocytes.** Mouse primary hepatocytes were isolated as previously describe<sup>3</sup>. Briefly, cells were initially obtained by perfusion of mouse liver lobules with liver perfusion medium and liver digest medium (Gibco/Invitrogen) at 37°C using a peristaltic pump. Hepatocytes were then purified using a 1.12 g/ml, 1.08 g/ml and 1.06g/ml Percoll gradient. Cells were cultured in William's E medium containing 4% FCS, 1% pen/strep in 24-well plates coated with 0.2% Gelatine in PBS. Cells were maintained in culture at 37°C and 5% CO<sub>2</sub>.

**Sporozoite infection and development in contact with infected blood.** Mouse primary hepatocytes and Huh7 cells, a human hepatoma cell line, were cultured as described above in complete William's E or RPMI (Gibco/Invitrogen) in transwell system plates (COSTAR/Corning). In the lower chamber, liver-derived cells were infected with 20,000 *P. berghei* ANKA sporozoites, and allowed to share medium with upper chambers containing serum (CTRL), non-

infected blood (NI) or blood containing  $6 \times 10^5$  *P. berghei* NK65 iRBCs (PbNK), new serum was added every 12h. After 36h of co-culture, hepatoma cells were collected and treated for FACS analysis and primary hepatocytes were fixed in 4% paraformaldehyde for 10 minutes, washed three times in PBS, and later permeabilized and blocked 1h in 0.3% Triton X-100 (Calbiochem) and 1% Bovine Serum Albumin (Sigma) to avoid non-specific reactivity. Coverslips were then incubated 1h at 4°C in the same solution containing anti-GFP IgG Alexa flour 488 conjugate antibody (Invitrogen), Alexa 594 phalloidin (Invitrogen) and DAPI (Sigma). After mounting coverslips on slides, EEFs were counted using the Leica DM5000B Widefield Fluorescence Microscope, and the sizes of 20 randomly chosen EEFs of each coverslip were measured using a Zeiss LSM 510 META Point Scanning Confocal Microscope. All immunofluorescence-stained images were analysed using the ImageJ 1.42b software.

**Fluorescence activated cell sorting (FACS) analysis of sporozoite infection.** FACS analysis of sporozoite-infected Huh7 hepatoma cell cultures at 36h post-sporozoite addition was performed to determine the percentage of parasite-containing cells and parasite-GFP intensity within infected cells. Cell samples for FACS analysis were processed as previously described <sup>4</sup>.

**Transcription profiling.** Total RNA from livers of naïve mice (control group), mice infected with  $10^6$  *P. berghei* NK65 iRBCs for 7 days (Blood stage group, BS), mice infected with  $5 \times 10^4$  *P. berghei* ANKA-GFP sporozoites for 40h (Liver stage group, LS), and mice infected with  $10^6$  *P. berghei* NK65 iRBCs for 7 days then re-infected with  $5 \times 10^4$  *P. berghei* ANKA-GFP sporozoites for 40h (Reinfection group, Reinf) was extracted using RNeasy Mini kit (Qiagen), following the manufacturer's instructions. Three biological replicates were analysed for each group. RNA quality and quantity was assessed on a Bioanalyser nanochip (Agilent). Total RNA was reverse transcribed and end-labelled as cRNA using the GeneChip WT Amplified Double-Stranded cDNA Synthesis Kit and the GeneChip WT Terminal Labeling Kit as recommended by Affymetrix. Hybridisation to an Affymetrix Mouse Gene 1.0 ST Array was carried out at 45°C for 16h under rotation (60 rpm). Arrays were washed on an Affymetrix FS450 and scanned using

an Affymetrix Genechip Scanner 3000 7G. Fluorescence intensities were background adjusted, quantile normalised and median polished into expression values using the robust multi-array averaging program RMA<sup>5</sup> in R/Bioconductor suite<sup>6</sup> (software package: affy<sup>7</sup>) To assess significance and differential expression (DE), each infected group was compared to the non-infected group, and out of 28815 main probesets represented on the array, 6273 transcript clusters were classified as significant (F-test,  $p < 0.05$ ) with 1704 being DE at a fold change of 2 (software packages: limma<sup>8</sup> and gplots). Each cluster separated from the non-hierarchical clustering was subjected to a Gene Ontology Biological Process enrichment analysis using a hypergeometric test (software package: GOstats<sup>9</sup>). Original data was submitted to Array Express and is accessible in the reviewer's user account: Username: Reviewer\_E-TABM-839, and Password: 1257429875724.

**Depletions using monoclonal antibodies.** (i) IL-6. Mice infected with *P. berghei* NK65 and control mice received 1 mg of IL-6 specific monoclonal antibody (clone MP520F3, Rat IgG1) 3h, 3 days, and 5 days after inoculation with infected blood, a protocol leading to IL-6 depletion at the time of sporozoite infection, 7 days post- *P. berghei* NK65 infection.

(ii) IFN $\gamma$ . Mice infected with *P. berghei* NK65 and control mice received 0.4 mg of IFN $\gamma$  specific monoclonal antibody (clone R46A2, Rat IgG1) 1, 2 and 3 days, after inoculation with infected blood, a protocol leading IFN $\gamma$  depletion at the time of sporozoite infection, 5 days post-*P. berghei* NK65 infection.

(iii) TNF $\alpha$ . Mice infected with *P. berghei* NK65 and control mice received 0.4 mg of TNF specific monoclonal antibody (clone XT3.11, Rat IgG1) 4 and 6 days after inoculation of infected blood, a protocol leading to TNF $\alpha$  depletion at the time of sporozoite infection, 5 days post-*P. berghei* NK65 infection.

**N $\omega$ -Nitro-L-arginine methyl ester hydrochloride treatment.** Mice infected with *P. berghei* NK65 and control mice received 50mg/kg of N $\omega$ -Nitro-L-arginine methyl ester hydrochloride (L-

NAME, Sigma) 3, 4, 5 and 6 days after inoculation of infected blood, a protocol leading to NOS inhibition at the time of sporozoite infection, 7 days post- *P. berghei* NK65 infection.

**S-methyl-isothiourea treatment.** Mice infected with *P. berghei* NK65 and control mice received 100 µg of S-methyl-isothiourea (SMT, Sigma) 3, 4, 5 and 6 days after inoculation of infected blood, a protocol leading to iNOS inhibition at the time of sporozoite infection, 7 days post- *P. berghei* NK65 infection.

**C3a receptor antagonist treatment.** C5a deficient (B10.D2-Hc0.H2d.H2-T18c/oSnJ) naïve or *P. berghei* NK65 infected mice received 0.5 mg of C3a receptor antagonist (SB290157, Calbiochem) 4h before sporozoite re-infection, 5 days post-*P. berghei* NK65 infection.

**N-Acetyl Cysteine treatment.** Mice infected with *P. berghei* NK65 and control mice received 20mg/kg of N-Acetyl Cystein treatment (NAC, Zambon) 2h after inoculation of infected blood, and every 12h for the course of the experiment. Three days post-blood stage infection all mice were infected with *gfp*-expressing *P. berghei* sporozoites and 40h later livers were collected.

**Splenectomy.** Intra-peritoneal injection of 250 µl of anaesthesia mixture (80 mg/kg Ketamine and 10 mg/kg Xylazine) was administered to mice 10 to 15 min before surgery. After observing the animals for response to anaesthesia, the animals were laid on their right side; and the fur removed with a razor. A 1.5 to 2 cm long skin incision was made in the left hypochondrium, the connective tissue under the skin was loosened and another incision in the peritoneal wall was made. Gently the spleen was pulled onto the exterior surface of the peritoneum. The artery, attached to the hilum of the spleen, close to the stomach was tied off with a single knot using 3-0 plain CATGUT suture. The efferent venule attached at the other end of the spleen was tied off similarly by a single knot using 3-0 plain CATGUT. Cutting away the mesentery and connective tissue, the spleen was removed. Peritoneal wall and underlying muscles were closed with plain CATGUT (3-0) and the skin incisions closed with wound clips. Mice with accessory spleen were excluded from the study. The control group underwent a sham surgery

and they were maintained in the same conditions.

***In vitro* hepcidin induction.** Mouse primary hepatocytes were cultured in the presence of solely medium or medium with added serum collected from non-infected and *P. berghei* NK65 infected mice, new serum was added every 12h. All these three conditions were tested in the presence of Dorsomorphin or IL-6 specific monoclonal antibody (clone MP520F3, Rat IgG1). After 24h culture cells were washed and collected for RNA extraction and measurement of hepcidin expression.

**Total non-heme iron quantification.** Total non-heme iron was measured as described previously<sup>10</sup>, in brief after drying samples (spleens and primary hepatocytes) for 48h at 45°C, tissues were weighed, and digested for 48h in 10% trichloroacetic acid/10% HCl at 65°C. Two hundred microliters of the extract were then added to 1 ml of chromogen solution (0.01% bathophenanthroline-disulfonic acid, 0.1% thioglycolic acid, 2.5 M sodium acetate) and after 15 minutes of incubation, absorbance was measured at 535 nm. A standard curve performed for known iron concentrations between 10 and 500 µg/ml revealed a linearity of response with a slope of ~1. Samples were diluted appropriately to fall within the linear range. Values were expressed as % of control, in micrograms of iron per gram of dry weight.

**HAMP1 peptide *in vivo* treatment.** Mice were treated with 40µg of hamp1 peptide (Peptide, Japan) 20h prior to sporozoite infection and 20h after sporozoite infection. All mice were then infected with  $2 \times 10^4$  *P. berghei* ANKA (1.49L) sporozoites, and 40h later livers were collected and liver infection was determined by expression of PbA 18S *rRNA*.

**HAMP adenovirus *in vivo* infection.** Mice were infected with adenoviral  $5 \times 10^{11}$  pu of pAd.CMV.GFP (control) or pAd.CMV.Hamp.ires.GFP.Wpre (HAMP.adV) kindly provided by Stefano Rivella for (Weill Cornell Medical College, USA) 48h prior to sporozoite infection, hepcidin expression was 2 fold upregulated by the Hamp.adv compared to uninfected and GFP.adv control groups. All mice were then infected with  $2 \times 10^4$  *P. berghei* ANKA (1.49L)

sporozoites, and 40h later livers were collected and liver infection was determined by expression of PbA 18S *rRNA*.

**HAMP transgenic mice and *Plasmodium* liver infection.** Wild-type and transgenic mice containing an over-expression of *hamp1*<sup>11</sup> were infected with  $3 \times 10^4$  *P. berghei* ANKA (1.49L) sporozoites, hepcidin expression was 2 fold upregulated by the transgene compared to wild-type control groups, and 40h later livers were collected and liver infection was determined by expression of PbA 18S *rRNA*.

**Tunel detection of apoptosis.** Liver tissues were harvested from wild type and caspase 3-deficient mice infected with *P. berghei* NK65 for 8 days along with non-infected wild type mice. Tissues were frozen in OCT freezing medium and then sliced into 16  $\mu\text{m}$  sections using a cryostat. Analysis of DNA fragmentation by transferase-mediated dUTP nick-end labelling (TUNEL) was performed using the In Situ Cell Death Detection kit, POD and DAB Substrate kits (Roche, USA) following the manufacturer's instructions, and later stained with DAPI (Sigma) for general nuclei count. Sections were imaged on a Zeiss LSM 510 META Point Scanning Confocal Microscope. Quantification of positive cells was determined counting a total of 1000 cells/section and calculating the proportion of stained nuclei. Images of immunofluorescence-stained sections were analysed using the ImageJ 1.42b software.

**Model description.** A stochastic, individual-based model was used to follow a cohort of  $N$  individuals for up to 20 years in a low, medium and high transmission setting (with according annual EIR of 2, 20 and 200, respectively). At each time point  $t_i$  the probability of an individual becoming infected,  $P$ , is given as the product of the probability of being bitten by an infected mosquito,  $p_{bite}$  ( $=1-1/\text{EIR}$ ), times the probability of this bite leading to successful blood stage infection which itself is dependent on the immune history of the host,  $p_{imm}$ , and the parasite density of a possible ongoing infection,  $p_{dens}$ . That is,  $P(\text{infection}) = P(p_{bite} \cap p_{imm} \cap p_{dens})$ . We assumed that the average parasite density per infection decreases with age<sup>12-14</sup> given as



$\pi_{age} = \pi_{max}(1 + k \exp(-age))$ , and that mean parasitaemia level also decreases over the course of infection <sup>15</sup>; for simplicity we assumed this to be linear although the actual functional form does not change the results presented here. We further assumed that there exists a threshold parasite density,  $p_{crit}$ , above which the host is mostly protected from super-infections. This threshold density then defines the probability of a successful inoculation as a function of infection length and is given as  $p_{dens} = \prod_i (1 + \exp(\tau_i - \Delta t_i)^\beta)^{-1}$ , where  $i$  is the number of concurrent infections,  $\Delta t_i$  is the time since infection  $i$ , and  $\tau_i = T_i(1 - \pi_{crit} / \pi_{max})$  is the time when the probability of a new blood stage infection is approximately half;  $1/T_i$  is the clearance rate of infection  $i$ . For reasons of simplicity and because we are here more concerned with the inhibitory effect on new liver-stage infections, we do not take into account the full complexity of super-infections (see e.g. <sup>16</sup>) and assume infections and their respective clearance rates to be independent. A graphical representation of the relationship between parasitaemia and probability of infection is given in Supplementary Figure 7. Finally we assumed acquired immunity to be driven by exposure, or rather the number of life-time blood stage infections. We chose this to be non-linear to take into account antigenic diversity of and immunity against the various life-stages of the parasite; again, the exact functional form does not have a significant effect on the results presented. The probability of an infection not being

blocked by immunity is then given as  $p_{imm} = \prod_{i=1..n} \sqrt{\frac{D-i}{D}}$ , where  $n$  is the life-time number of

blood stage infections and  $D$  can be understood as a measure of antigenic diversity and which defines the rate of acquired protection with infection history (see SI). We also considered maternal protection during the first few months of life to examine if this could explain the observed patterns in the number and multiplicities of infections (MOI). This was done by including a time-dependent probability of infection  $p_{mat} = 1 / (1 + \exp(-0.05(t - 90)))$ . However, apart from an initial drop in the resulting number of infections and MOI in the <1 year old age

class (see Fig. S11) this had no effect on the overall model predictions and was thus dropped from the subsequent analyses. The parameter values used for the simulations are as follows:  $N=500$ ,  $p_0=5000$ ,  $k=2$ ,  $b=2$ ,  $p_{crit}=3000$ ,  $T \sim \text{normal}(100)$  and  $D=500$ . Note, our results are robust to a wide range of parameter values; however, we do not attempt to fit the outcome to actual epidemiological data but here are more concerned with the qualitative behaviour of the model.

**Statistical analysis.** All experiments were performed with a minimum number of 5 mice per group, and all shown results are one representative of at least three independent experiments, or the cumulative result of at least three independent experiments. In all bar graphs, bars represent average and error bars represent standard deviation. Significance is indicated by \* and its value is identified in every graph. For samples in which  $n > 5$ , statistical analysis was performed using unpaired Student t or variance (ANOVA) parametric tests. Normal distributions were confirmed using the Kolmogorov-Smirnov test.

1. Ploemen, I.H., *et al.* Visualisation and quantitative analysis of the rodent malaria liver stage by real time imaging. *PLoS One* **4**, e7881 (2009).
2. Bruna-Romero, O., *et al.* Detection of malaria liver-stages in mice infected through the bite of a single Anopheles mosquito using a highly sensitive real-time PCR. *Int J Parasitol* **31**, 1499-1502 (2001).
3. Goncalves, L.A., Vigarrio, A.M. & Penha-Goncalves, C. Improved isolation of murine hepatocytes for in vitro malaria liver stage studies. *Malar J* **6**, 169 (2007).
4. Prudencio, M., Rodrigues, C.D., Ataide, R. & Mota, M.M. Dissecting in vitro host cell infection by Plasmodium sporozoites using flow cytometry. *Cell Microbiol* **10**, 218-224 (2008).
5. Irizarry, R.A., *et al.* Exploration, normalization, and summaries of high density oligonucleotide array probe level data. *Biostatistics* **4**, 249-264 (2003).
6. Gentleman, R.C., *et al.* Bioconductor: open software development for computational biology and bioinformatics. *Genome Biol* **5**, R80 (2004).
7. Gautier, L., Cope, L., Bolstad, B.M. & Irizarry, R.A. affy--analysis of Affymetrix GeneChip data at the probe level. *Bioinformatics* **20**, 307-315 (2004).
8. R. Gentleman, V.C., S. Dudoit, R. Irizarry, W. Huber *Bioinformatics and Computational Biology Solutions using R and Bioconductor (Limma: linear models for microarray data (397--420) by Gordon K. Smyth)*, (Springer, New York, 2005).
9. Falcon, S. & Gentleman, R. Using GStats to test gene lists for GO term association. *Bioinformatics* **23**, 257-258 (2007).

10. Patel, B.N., *et al.* Ceruloplasmin regulates iron levels in the CNS and prevents free radical injury. *J Neurosci* **22**, 6578-6586 (2002).
11. Roy, C.N., *et al.* Hepcidin antimicrobial peptide transgenic mice exhibit features of the anemia of inflammation. *Blood* **109**, 4038-4044 (2007).
12. Mayor, A., *et al.* Plasmodium falciparum multiple infections in Mozambique, its relation to other malariological indices and to prospective risk of malaria morbidity. *Trop Med Int Health* **8**, 3-11 (2003).
13. Mmbando, B.P., *et al.* Epidemiology of malaria in an area prepared for clinical trials in Korogwe, north-eastern Tanzania. *Malar J* **8**, 165 (2009).
14. Molineaux, L. & Gramiccia, G. *The Garki project: research on the epidemiology and control of malaria in the Sudan Savanna of West Africa.*, (World Health Organization, Geneva, 1980).
15. Collins, W.E. & Jeffery, G.M. A retrospective examination of sporozoite- and trophozoite-induced infections with Plasmodium falciparum in patients previously infected with heterologous species of Plasmodium: effect on development of parasitologic and clinical immunity. *Am J Trop Med Hyg* **61**, 36-43 (1999).
16. Bruce, M.C., *et al.* Cross-species interactions between malaria parasites in humans. *Science* **287**, 845-848 (2000).

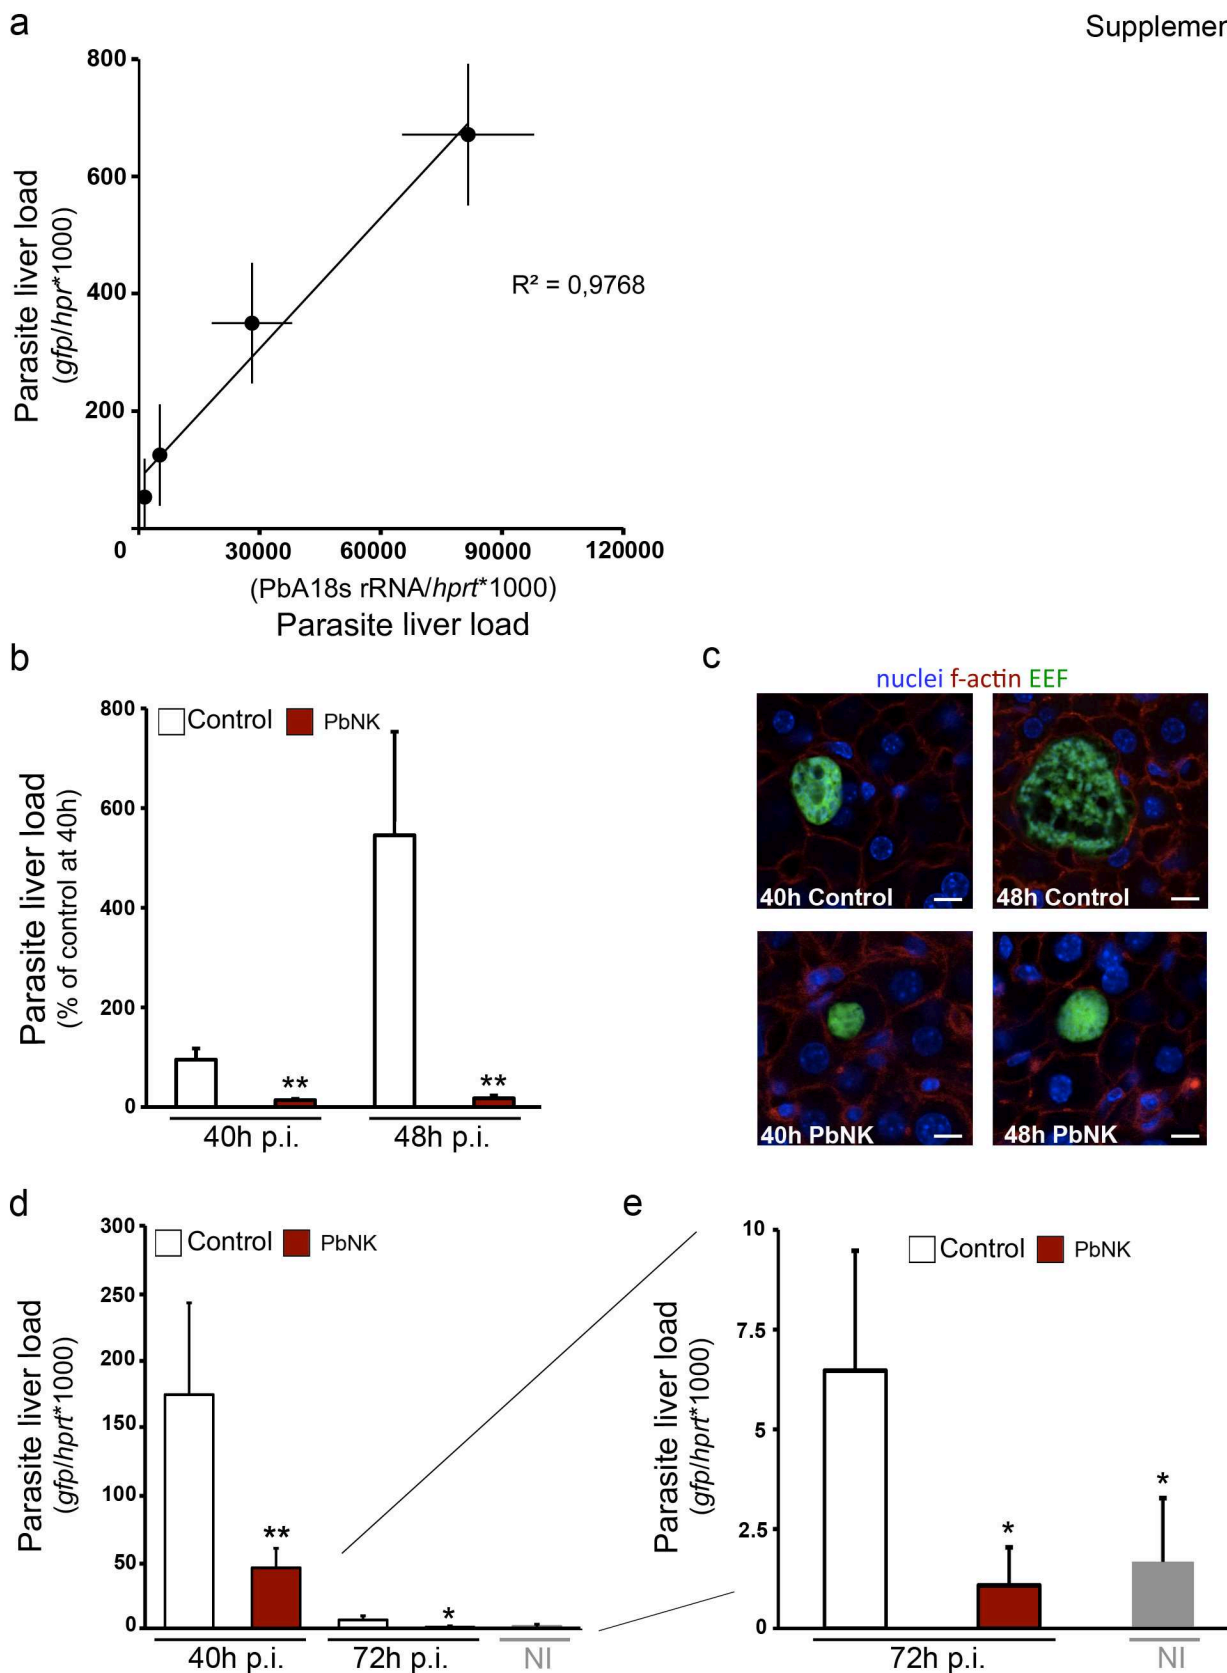

**Supplementary Figure 1.** (a) Correlation between expression levels of 18S rRNA and *gfp* cDNA in mouse livers, 40h post  $5 \times 10^3$ ,  $2 \times 10^4$ ,  $5 \times 10^4$  and  $1.5 \times 10^5$  *P. berghei* ANKA-GFP sporozoite injection. Dots show the average expression of 4 mice and the black line represents the positive correlation between the two parameters measured. (b) *Plasmodium* liver load 40 and 48h post  $5 \times 10^4$  *P. berghei* ANKA-GFP sporozoite injection into naïve mice (control) and mice infected 5 days previously with  $10^6$  *P. berghei* NK65 (PbNK). (c) Representative EEFs in liver sections of naïve mice (Control) or mice infected 5 days previously with  $10^6$  *P. berghei* NK65 iRBCs (PbNK), 40 and 48h post  $5 \times 10^4$  *P. berghei* ANKA-GFP expressing sporozoite infection. (Bar =  $10\mu m$ .) (d) *Plasmodium* liver load 40 and 72h post  $5 \times 10^4$  *P. berghei* ANKA-GFP sporozoite injection into naïve mice (Control) and mice infected 5 days previously with  $10^6$  *P. berghei* NK65 (PbNK), compared to a non-infected group (NI). (e) Magnification of 72h post infection of  $5 \times 10^4$  *P. berghei* ANKA-GFP sporozoite injection into naïve mice (Control) and mice infected 5 days previously with  $10^6$  *P. berghei* NK65 (PbNK), and non infected control group shown in (c). (\* $P < 0.01$ , Ttest). Results are expressed as mean  $\pm$  s.d. of 3 independent infections each counting with a minimum of 5 mice per group.

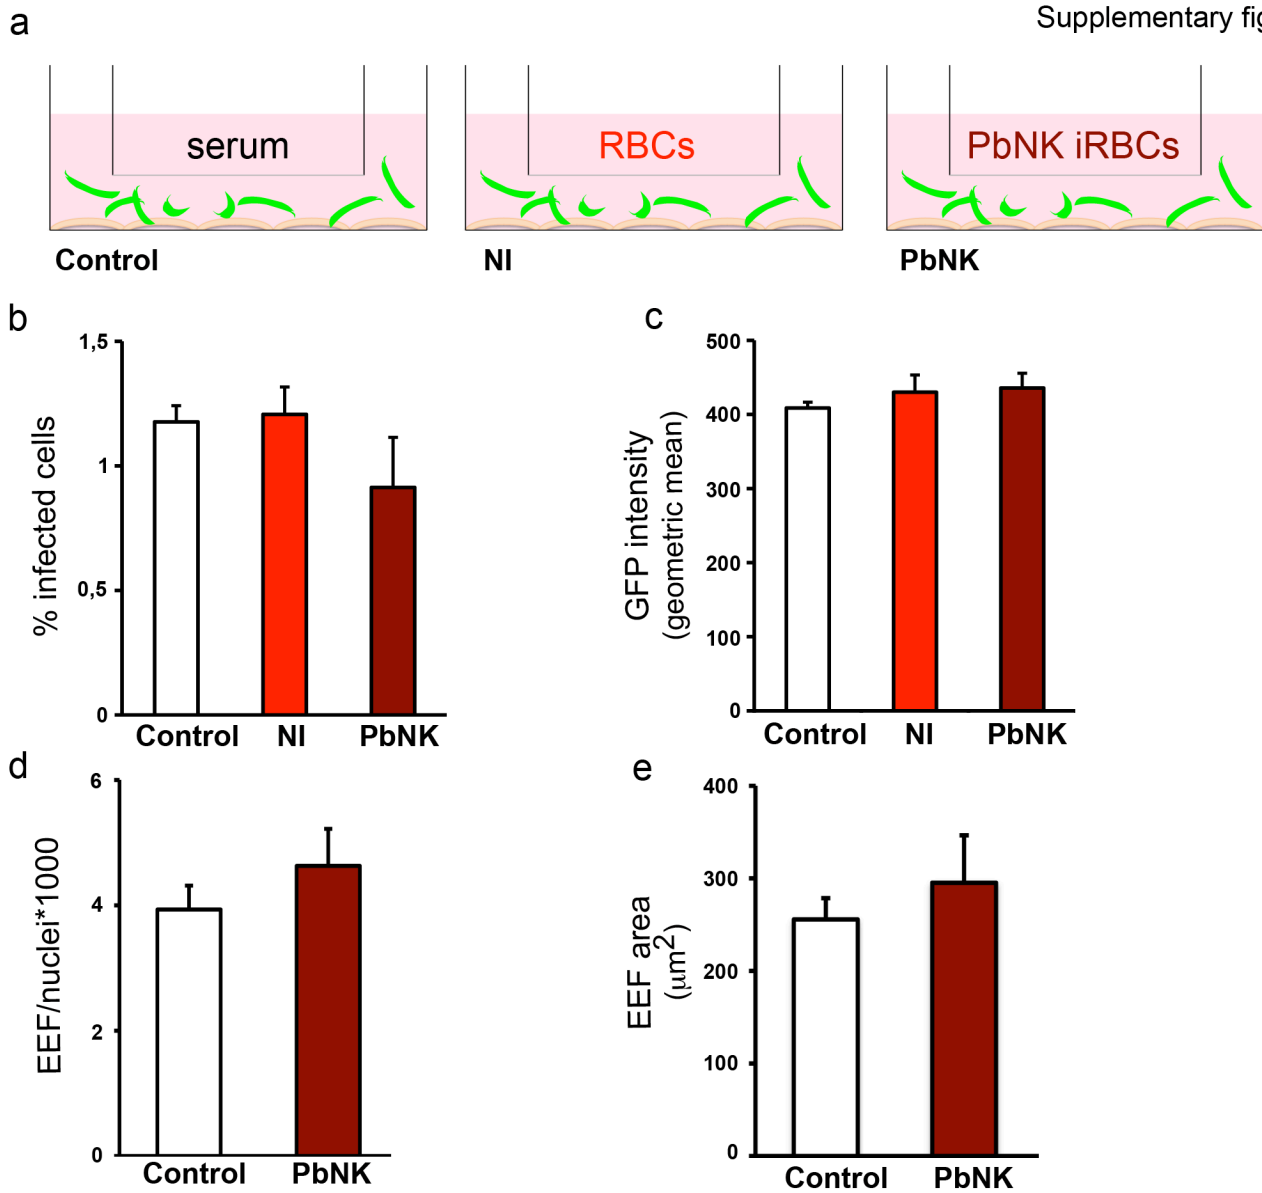

**Supplementary Figure 2.** (a) Effect of *Plasmodium* iRBC supernatants on sporozoite hepatocyte infection. Primary hepatocytes grown in the lower chamber of a transwell system where infection by sporozoites (green crescents) takes place, contacting with medium (Control), non-infected blood (NI) or blood containing  $6 \times 10^5$  *P. berghei* NK65 iRBCs (PbNK) within the upper chamber. (b) Sporozoite infection (% infected cells) in the three conditions described above 36h post- $2 \times 10^4$  *P. berghei* ANKA GFP expressing sporozoite addition, measured by FACS. (c) EEF development (GFP intensity) in the three conditions described above 36h post- $2 \times 10^4$  *P. berghei* ANKA GFP expressing sporozoite addition, quantified by FACS. (d) Sporozoite infection (EEF/1000 nuclei) of mouse primary hepatocytes isolated from naive mice (control) and mice infected 5 to 7 days previously with  $6 \times 10^5$  *P. berghei* NK65 iRBCs (PbNK), 48h post- $2 \times 10^4$  *P. berghei* ANKA GFP expressing sporozoite addition, analysed by wide field microscopy. (e) EEF development (EEF area) in mouse primary hepatocytes isolated from naive mice (control) and mice infected 5 to 7 days previously with  $6 \times 10^5$  *P. berghei* NK65 iRBCs (PbNK), 48h post- $2 \times 10^4$  *P. berghei* ANKA GFP expressing sporozoite addition, analysed by confocal microscopy.



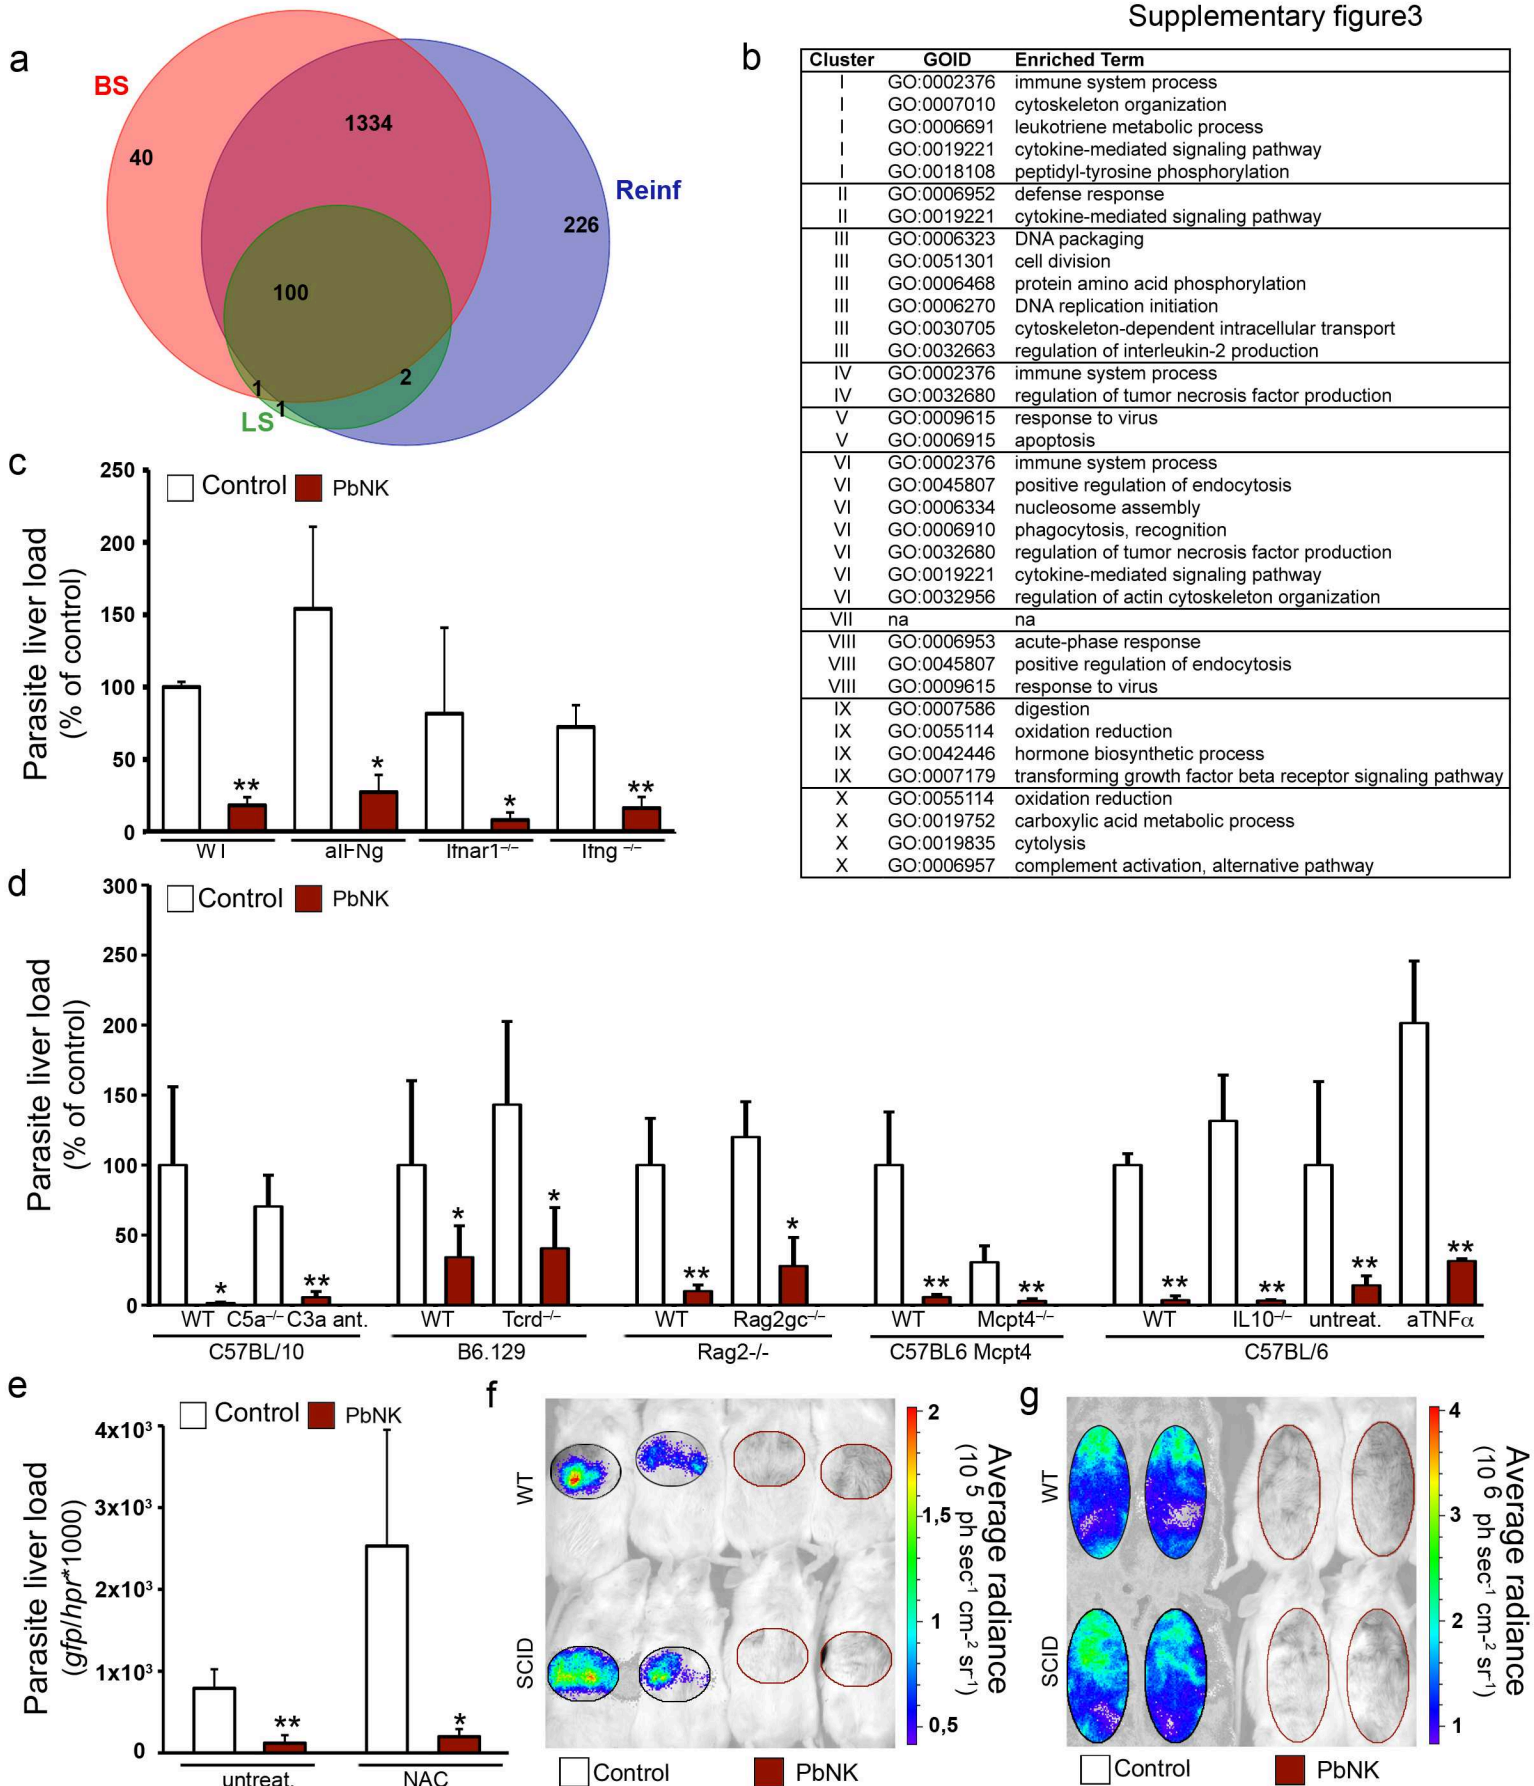

**Supplementary Figure 3.** (a) Microarray data analysis of liver RNA and targeting of hit molecules. Venn diagram showing the proportion of differentially expressed (DE) transcripts. Numbers are indicated for each group. (b) Gene Ontology enrichment *aPlasmodium* load measurement after sporozoite infection of naïve mice (Control) or mice previously infected with *P. berghei* NK65 (PbNK). (c) 40h post  $5 \times 10^4$  ANK PbA-GFP sporozoite injection of mice infected 5 days before with  $10^6$  iRBCs of PbNK iRBCs, with and without IFN $\gamma$  monoclonal antibody (aIFN $\gamma$ ) and using mice deficient for interferon alpha receptor 1 (Ifnar1 $^{-/-}$ ), and mice deficient for Interferon  $\gamma$  (Ifng $^{-/-}$ ). (d) 40h post  $5 \times 10^4$  PbA-GFP sporozoite injection of mice infected 5 days before with  $10^6$  PbNK iRBCs, using mice with different and genotypes, complement factor deficient C5a $^{-/-}$  mice treated with C3a antagonist SB 290157 (C5a $^{-/-}$ -C3a ant.), TCR delta deficient (Tcrd $^{-/-}$ ), Rag2gc deficient, mastocyte deficient (Mcpt4 $^{-/-}$ ), IL-10 deficient (IL10 $^{-/-}$ ) and after monoclonal antibody treatment (aTNF $\alpha$ ), all compared to respective background littermates. (e) 40h post  $5 \times 10^4$  PbA-GFP sporozoite injection of mice infected 3 days before with  $10^6$  PbNK iRBCs, treated with N-acyl.cystein (NAC). (f) 40h after luciferase-expressing PbA infective mosquito bites of mice infected 8 days before with  $10^6$  PbNK iRBCs. (g) as in (d) but 3 days later. (\* $P < 0.05$ , \*\* $P < 0.01$ , Ttest) Results are expressed as the mean  $\pm$  s.d. of 3 independent infections each counting with a minimum of 5 mice per group.

a

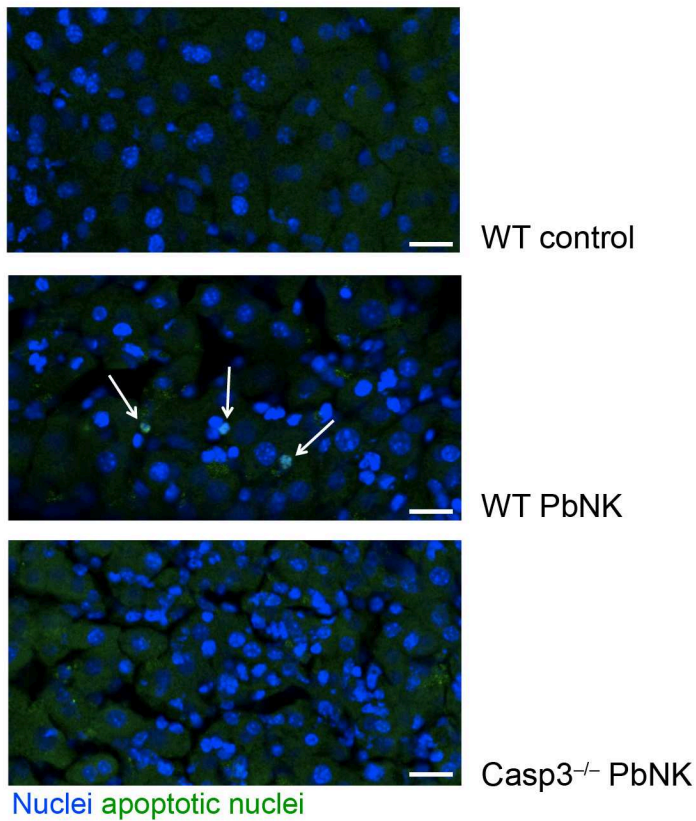

b

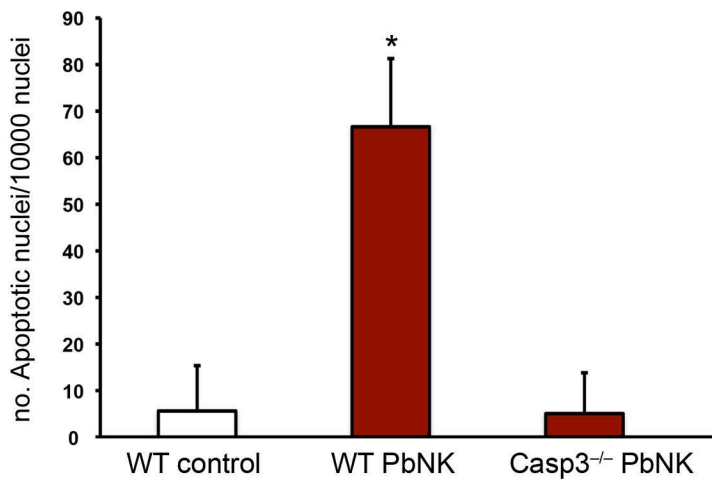

**Supplementary Figure 4.** Blood stage induced apoptosis in caspase 3-deficient mice. **(a)** Apoptosis in liver sections of naïve wild-type C57BL/6 mice (WT control), wild-type C57BL/6 mice infected 6 days previously with  $10^6$  *P. berghei* NK65 iRBCs (WT PbNK) and caspase3-deficient mice infected 6 days previously with  $10^6$  *P. berghei* NK65 iRBCs (Casp3<sup>-/-</sup> PbNK). (bar = 20 $\mu$ m). **(b)** Quantification of apoptotic nuclei in liver sections of naïve wild-type C57BL/6 mice (WT control), wild-type C57BL/6 mice infected 6 days previously with  $10^6$  *P. berghei* NK65 iRBCs (WT PbNK) and caspase3 deficient mice infected 6 days previously with  $10^6$  *P. berghei* NK65 iRBCs (Casp3<sup>-/-</sup> PbNK) (\*P < 0.05 Ttest). Results are expressed as the mean  $\pm$  s.d. of 3 independent infections each counting with a minimum of 5 mice per group.

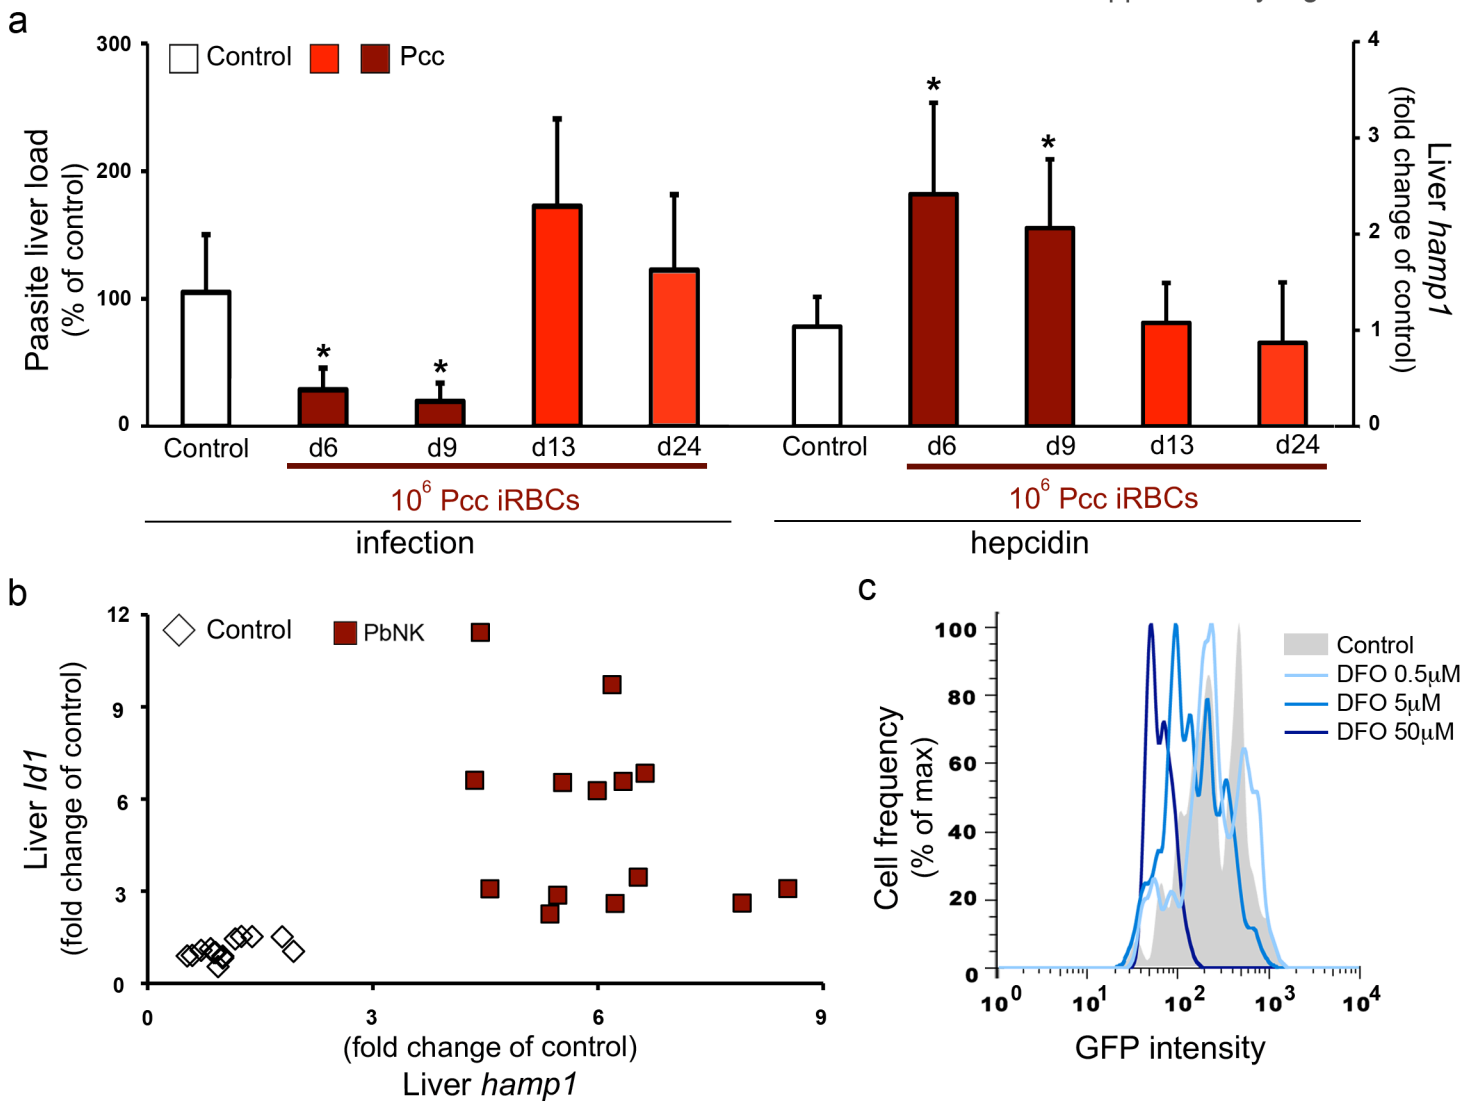

**Supplementary Figure 5.** (a) *Plasmodium* liver load (left axis), and relative hepcidin expression levels (right axis), 40h post  $7 \times 10^4$  *P. berghei* ANKA-GFP sporozoite injection into naïve mice (Control), mice infected 6, 9, 13 and 24 days previously with  $10^6$  *P. chabaudi* AS iRBCs (Pcc). (\* $P < 0.05$ , Ttest) (b) Liver Id1 and hepcidin expression levels, 40h post  $5 \times 10^4$  *P. berghei* ANKA-GFP sporozoite injection into naïve mice (control), mice infected 4 days previously with  $10^6$  *P. berghei* NK65 (PbNK). (c) Effect of various concentrations of DFO on *P. berghei* ANKA-GFP EEF development inside Huh7 hepatoma cells, 36h after- $2 \times 10^4$  *P. berghei* ANKA-GFP expressing sporozoite addition. The graphs show one representative data set of triplicate samples.



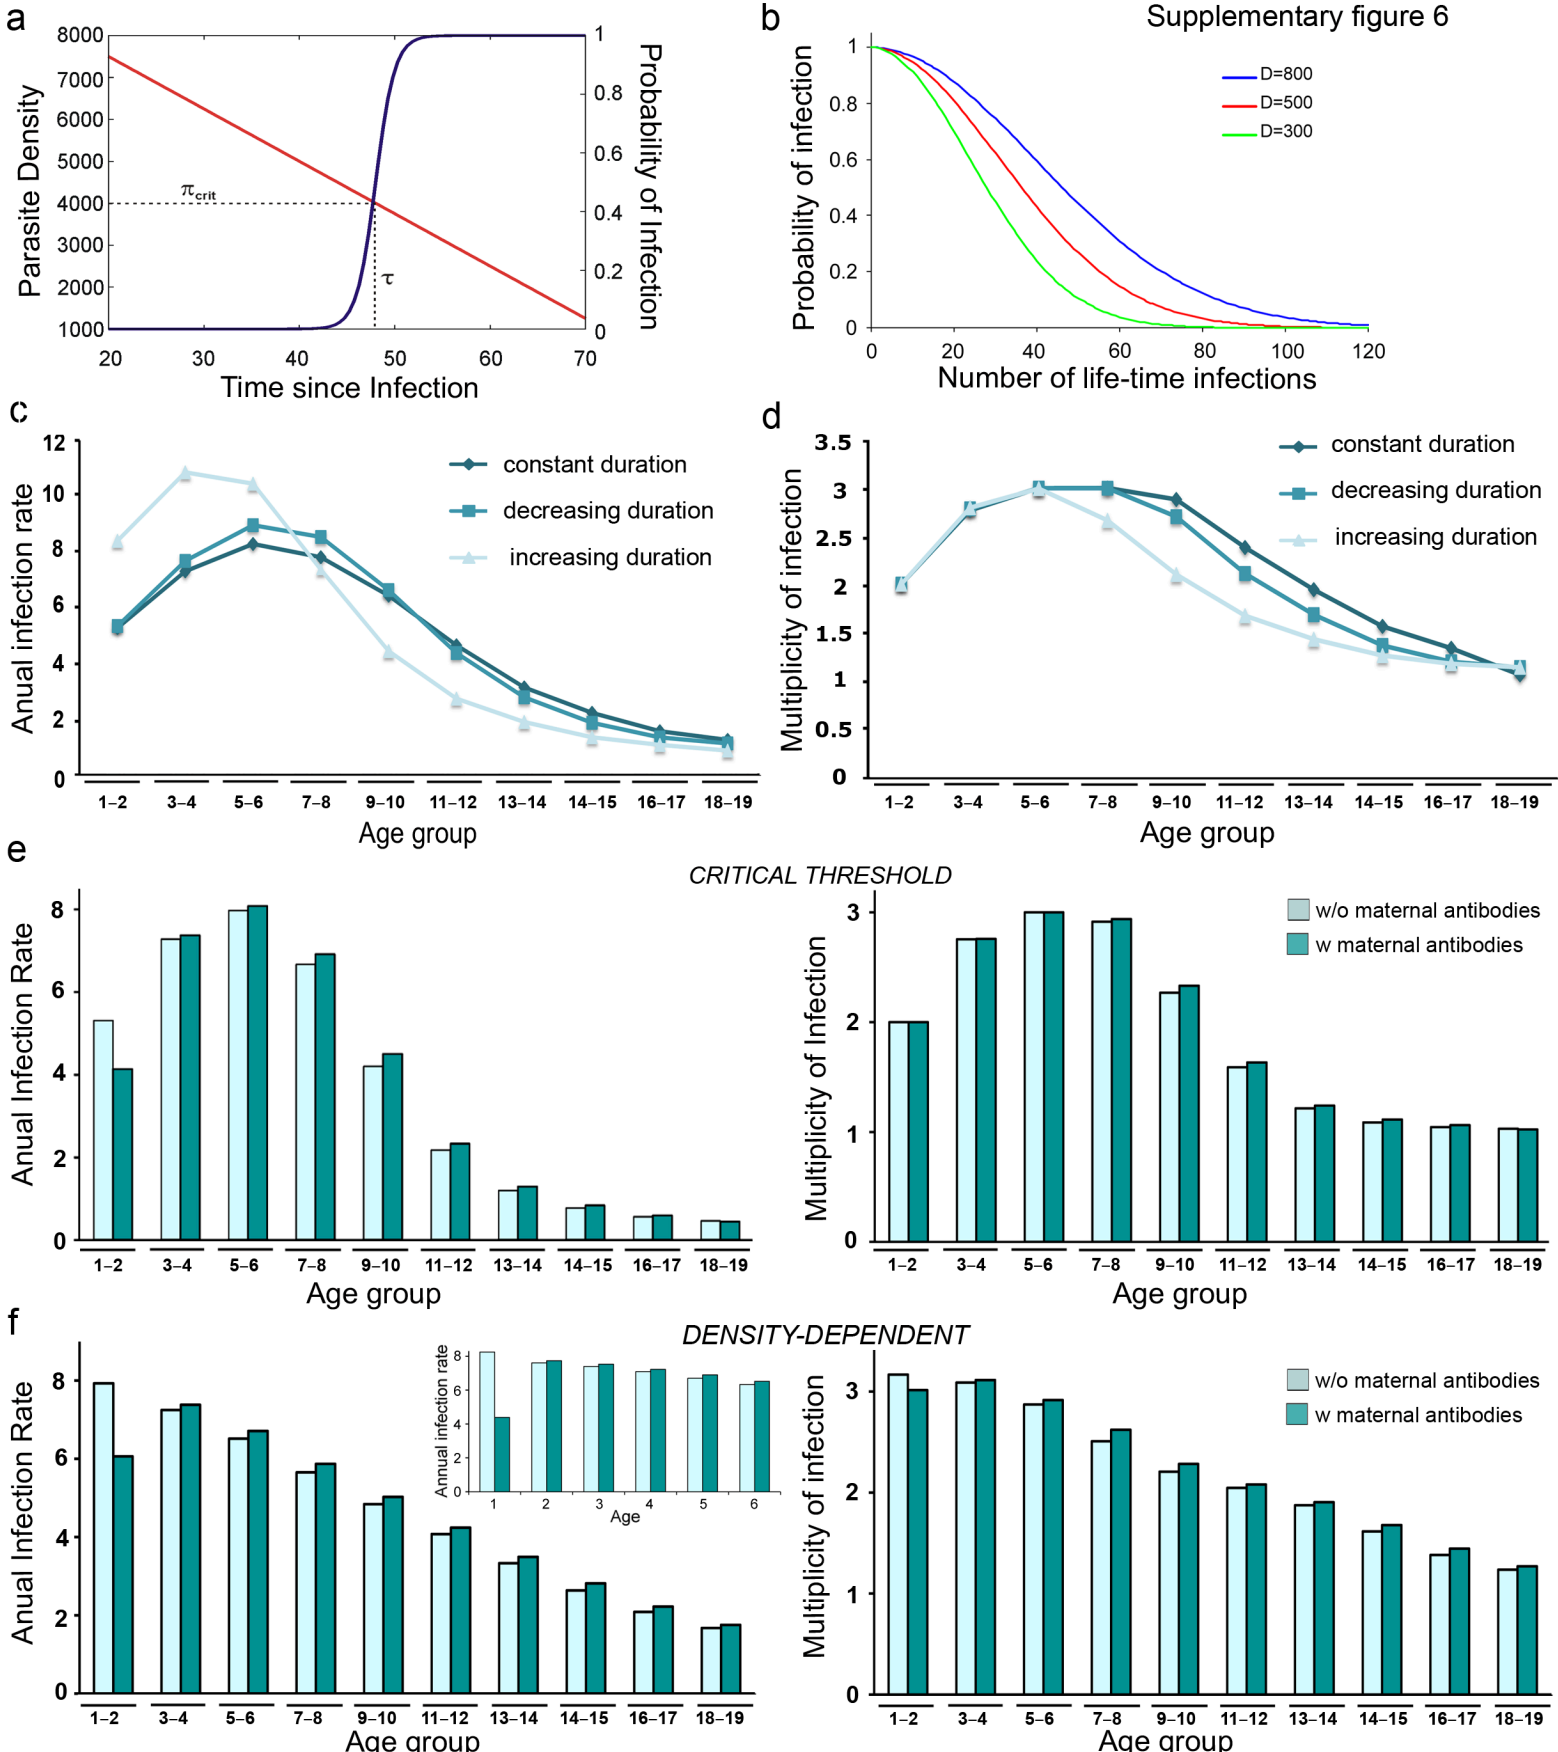

**Supplementary Figure 6.** (a) Functional relationship between parasite density and probability of infection. As the level of parasitaemia of an ongoing infection (red line) remains above a critical threshold density,  $\pi_{crit}$ , the probability of establishing a new blood stage infection (blue line) is extremely low but significantly increases as soon as the parasitaemia level falls below this threshold. (b) Acquired immunity as a function of infection history. The probability of infection is dependent on the total number of blood-stage infections experienced by the host and D, which can generally be understood as a proxy for antigenic diversity, where greater D requires more infections to gain protection. (c and d) Model behaviour under changes in duration of infections. The model was tested under three different assumptions concerning the duration of infection: (i) constant over age ( $T=100$ ), (ii) decreasing with age ( $T=100-2*\text{age}$ ), or (iii) increasing with age ( $T=60+2*\text{age}$ ). Shown are the age-related annual infection rates (c) and multiplicity of infections (d) under these assumptions, clearly demonstrating a qualitative invariance of the model's behaviour to the underlying assumption about the period of infection. (d and f) Effect of maternally derived protection. Assuming that individuals are protected from clinical infections (and high parasitaemia episodes) for the first 3-6 months of live due to maternal antibodies can lead to a small decline in the rate of clinical infections in the youngest age classes but no significant difference in the multiplicity of infection (MOI). (e) The overall qualitative behaviour, i.e. the initial increase in both infection rate and MOI followed by a steady decrease with age, is preserved when assuming maternal protection within the critical threshold model. (f) Including this maternal effect within the density-dependent model does result in a decrease in annual infection rate and MOI in the youngest age class although this is entirely due to the temporary protection of the <1 year olds.

**Supplementary table 1.** Differentially expressed (DE) transcripts organised as toptable (sorted by log odds that a transcript is DE = B column). Cluster Nb corresponds to the clusters found in the non-hierarchical clustering and used for GO enrichment analysis. GO annotation for each transcript is also added, as well as if the transcript detected is a full length or partial or even if it's an EST. All transcripts are significant at p.value adjusted for multiple testing  $p < 0.05$ . Transcript Cluster ID is the Affymetrix accession number. logFC is the log base of the fold change. Grey highlighted rows correspond to genes mentioned in the text.

| Affymetrix ID      | BS/Non Inf.  |              | LS/Non Inf.  |              | ReIN/Non Inf. |              | Average     | Cluster     | Gene               | Gene                                          | Gene Ontology (GC)      | Transcript     |
|--------------------|--------------|--------------|--------------|--------------|---------------|--------------|-------------|-------------|--------------------|-----------------------------------------------|-------------------------|----------------|
| Transcript Cluster | logFC        | B            | logFC        | B            | logFC         | B            | expression  | Number      | Symbol             | Title                                         | Description             | Classification |
| 10345436           | -0.488662795 | -6.097090524 | -0.825587163 | -3.532697959 | -1.076411999  | -3.117384936 | 6.217143022 |             | LOC280487          | pol polyprotein                               | ---                     | partial        |
| 10345675           | -0.601415904 | -4.795082462 | 0.35401      | -5.448006231 | -1.400368093  | 0.620039438  | 5.596311087 |             | Npas2              | neuronal PAS dom:two-component ser            |                         | full-length    |
| 10345762           | 0.458723039  | -6.626551458 | 0.596520253  | -5.34801059  | 1.502116908   | -2.596326751 | 9.483007998 | Cluster II  | Il1r1              | interleukin 1 recept signal transducer a      |                         | full-length    |
| 10345824           | 1.568464859  | 4.074662933  | 0.265663926  | -5.67002262  | 1.295822929   | 1.686074687  | 5.127333798 | Cluster I   | Il18rap            | interleukin 18 recep receptor activity /// i  |                         | full-length    |
| 10346168           | 1.528045861  | 8.174531437  | -0.201671997 | -5.425216669 | 1.529619231   | 7.753375662  | 4.854649429 |             | Stat4              | signal transducer a DNA binding /// trar      |                         | full-length    |
| 10346191           | 2.245572797  | 11.23540134  | 1.660163087  | 7.406066781  | 2.746698753   | 13.22610923  | 10.57502395 | Cluster VI  | Stat1              | signal transducer a DNA binding /// trar      |                         | full-length    |
| 10346222           | -0.488662795 | -6.097090524 | -0.825587163 | -3.532697959 | -1.076411999  | -3.117384936 | 6.217143022 |             | LOC280487          | pol polyprotein                               | ---                     | partial        |
| 10346365           | 1.238860264  | -0.384631353 | 0.009722207  | -6.39106834  | 0.658326799   | -4.736829807 | 4.835880402 | Cluster III | Sgol2              | shugoshin-like 2 (S chromosome, centr         |                         | full-length    |
| 10346410           | -1.305856453 | 1.39552679   | -0.106658749 | -6.27740713  | -1.639414101  | 3.314302862  | 11.56194851 |             | Aox3               | aldehyde oxidase 3 aldehyde oxidase a         |                         | full-length    |
| 10346783           | 1.116786756  | 0.770029106  | 0.124253399  | -6.206669298 | 1.164535111   | 0.791102651  | 5.177951702 |             | Cd28               | CD28 antigen                                  | positive regulation of  | full-length    |
| 10346799           | 1.244777455  | 5.865333743  | -0.020208044 | -6.381216662 | 1.316080191   | 6.070957486  | 5.841575758 |             | Icos               | inducible T-cell co- protein binding /// ir   |                         | full-length    |
| 10347222           | 1.009351426  | 1.168341395  | 0.326829754  | -4.859414166 | 0.924341947   | -0.013352143 | 8.293681242 |             | ---                | ---                                           | ---                     | est            |
| 10347277           | -1.090022407 | -0.823040232 | -0.184213474 | -6.096532361 | -2.386674567  | 6.773248621  | 10.61137768 |             | Igfbp2             | insulin-like growth f regulation of cell gr   |                         | full-length    |
| 10347291           | 0.684676664  | -3.650414189 | -0.094564517 | -6.302858742 | 1.340719157   | 1.206746426  | 3.806800288 |             | Il8rb              | interleukin 8 recept signal transducer a      |                         | full-length    |
| 10347335           | 2.278314362  | 14.57719563  | 0.422528475  | -2.126773417 | 2.527775954   | 15.41483684  | 8.624475088 |             | Slc11a1            | solute carrier family transporter activity ,  |                         | full-length    |
| 10347928           | 1.356642952  | 7.36001555   | 0.234880094  | -6.276654087 | 1.407440196   | 7.355674074  | 5.476680342 |             | ---                | ---                                           | ---                     | partial        |
| 10347933           | 1.560499279  | 6.143283378  | 0.187881662  | -5.807803663 | 1.868274434   | 7.797119961  | 6.667701127 |             | Sp140 /// A530032I | Sp140 nuclear bod; zinc ion binding /// r     |                         | full-length    |
| 10347948           | 0.918196146  | 1.354902028  | 0.505754699  | -2.585760485 | 1.058910266   | 2.385416972  | 7.573024817 |             | Sp100              | nuclear antigen Sp; DNA binding /// binc      |                         | full-length    |
| 10348244           | 1.738001686  | 9.469374676  | 0.004353374  | -6.391323262 | 1.688241862   | 8.692895905  | 7.214365916 | Cluster I   | Inpp5d             | inositol polyphosph inositol or phosphat      |                         | full-length    |
| 10348702           | -0.50596952  | -4.628101337 | -0.052503521 | -6.357725144 | -1.407190544  | 2.760263873  | 9.348201241 | Cluster X   | Agxt               | alanine-glyoxylate ; catalytic activity /// ; |                         | full-length    |
| 10349661           | 1.680824552  | 5.144786193  | 0.344731087  | -5.0546373   | 2.1352932     | 7.455580651  | 5.887134529 |             | 5430435G22Rik      | RIKEN cDNA 5430 nucleotide binding /          |                         | full-length    |
| 10349968           | 1.427600734  | -0.256316403 | 0.068122624  | -6.364326118 | 2.314194199   | 4.136204015  | 5.932215742 |             | Chi3l1             | chitinase 3-like 1 catalytic activity /// l   |                         | full-length    |
| 10350136           | 1.561697103  | 8.093157466  | -0.06927187  | -6.276654408 | 1.507842033   | 7.249358357  | 8.901392019 | Cluster I   | Csrp1              | cysteine and glycyl protein binding /// n     |                         | full-length    |
| 10350247           | 1.080375795  | 1.055258105  | 0.454354862  | -4.033226296 | 1.244611762   | 2.057660348  | 5.607917906 |             | Kif21b             | kinesin family mem nucleotide binding /       |                         | full-length    |
| 10350630           | 1.321470502  | 2.276906762  | 0.020093247  | -6.387016139 | 0.848068004   | -1.996823983 | 6.659460595 | Cluster III | Fam129a            | family with sequenc negative regulation       |                         | full-length    |
| 10350733           | -0.014113415 | -7.278357094 | 0.16497872   | -6.177300387 | -1.350982589  | 0.234568256  | 9.176120665 |             | Rgs16              | regulator of G-prote signal transducer a      |                         | full-length    |
| 10350838           | 2.551290618  | 6.695762609  | 0.432454803  | -5.179335221 | 2.393876047   | 5.539023704  | 7.445096409 |             | 2810417H13Rik      | RIKEN cDNA 2810 nucleus /// mitochor          |                         | full-length    |
| 10351182           | 1.485107925  | 0.586966806  | -0.100790127 | -6.324957052 | 2.329459636   | 4.808263004  | 6.004016261 |             | Sele               | selectin, endothelia binding /// protein b    |                         | full-length    |
| 10351197           | 2.334114146  | 7.154491617  | -0.152993339 | -6.179350612 | 2.888676791   | 9.229972691  | 6.692433976 |             | Sell               | selectin, lymphocyt binding /// protein b     |                         | full-length    |
| 10351206           | 0.867361333  | -1.321676529 | 0.069243969  | -6.332462495 | 1.370177033   | 2.501456826  | 5.60655358  | Cluster IV  | Selp               | selectin, platelet glycoprotein bindin        |                         | full-length    |
| 10351293           | -0.751052198 | -1.808340459 | -0.493701816 | -3.56027995  | -1.287103194  | 2.689000294  | 6.018635441 |             | Dpt                | dermatopontin protein binding /// e           |                         | full-length    |
| 10351380           | 0.892956567  | -1.943854175 | -0.269983577 | -5.703569557 | 2.049555665   | 5.672559586  | 7.378538886 |             | Ildr2              | immunoglobulin-like ---                       |                         | full-length    |
| 10351477           | 1.186634491  | -0.272682983 | -0.142762829 | -6.219802944 | 1.242948217   | -0.218601857 | 4.006053373 | Cluster I   | Sh2d1b1            | SH2 domain protei phosphotyrosine bi          |                         | full-length    |
| 10351509           | 2.841819489  | 15.45932015  | 0.441521476  | -2.71974558  | 3.075590109   | 16.01124046  | 8.983862863 |             | Fcgr4              | Fc receptor, IgG, lo receptor activity /// i  |                         | full-length    |
| 10351603           | 1.556326916  | 8.473372975  | 0.036601279  | -6.356666839 | 1.567628491   | 6.66342467   | 6.86342467  |             | Arhgap30           | Rho GTPase activa molecular _function         |                         | full-length    |
| 10351644           | 1.615634983  | 5.124579543  | -0.060886902 | -6.34198717  | 1.737446201   | 5.515617234  | 5.609582963 |             | Cd244              | CD244 natural kille receptor activity /// j   |                         | full-length    |
| 10351658           | 2.522447918  | 13.90759518  | -0.061766518 | -6.298054647 | 2.512707559   | 13.46627181  | 7.006319409 | Cluster VI  | Cd48               | CD48 antigen                                  | protein binding /// p   | full-length    |
| 10351679           | 1.394320753  | 5.462182946  | -0.139351858 | -6.02873136  | 1.30283081    | 4.28572126   | 6.883782526 |             | Cd84               | CD84 antigen                                  | receptor activity /// j | full-length    |
| 10351691           | 1.100684335  | 6.257330663  | 0.161952271  | -5.52191284  | 0.960231284   | 4.301727566  | 4.757971483 |             | Slamf6             | SLAM family memt receptor activity /// j      |                         | full-length    |
| 10351792           | 1.561576307  | 10.34337334  | 0.258436141  | -4.377862172 | 1.720155183   | 11.07417637  | 6.657600169 |             | Slamf9             | SLAM family memt membrane /// integr          |                         | full-length    |
| 10351825           | 1.811187972  | 10.84318358  | -0.251028138 | -4.801401858 | 1.721957093   | 9.813086611  | 7.474558649 |             | Tagln2             | transgelin 2                                  | muscle developme        | full-length    |
| 10351867           | 1.072097677  | 3.083283713  | -0.185203377 | -5.708429779 | 0.982535182   | 1.793274685  | 5.170416975 |             | Aim2               | absent in melanom protein binding /// n       |                         | full-length    |
| 10351873           | 2.28142115   | 6.700626036  | 1.029071192  | -0.608596332 | 2.554497554   | 7.581962168  | 6.396509508 |             | Pyhin1             | pyrin and HIN dom; protein binding /// n      |                         | full-length    |
| 10352344           | -1.015213476 | 2.301230637  | -0.448676484 | -3.251060095 | -2.205925589  | 10.6731044   | 8.451798175 |             | ---                | ---                                           | ---                     | predicted      |
| 10352439           | -1.236846041 | 5.695558624  | -0.092604521 | -6.176952776 | -1.567998449  | 8.006570776  | 6.38606834  |             | Susd4              | sushi domain conta membrane /// integr        |                         | full-length    |
| 10352548           | -0.919126119 | 0.551804675  | -0.095255508 | -6.238161762 | -1.330436461  | 3.885246873  | 8.765617624 |             | Slc30a10           | solute carrier family plasma membrane         |                         | full-length    |

| 10352709           | 1.188215565  | 0.683735867  | -0.102366216   | -6.282188557 | 0.613764117  | -4.320271609 | 5.275984687 | Cluster III       | Nsl1               | NSL1, MIND kineto nucleus /// cell cycl     | full-length |                |
|--------------------|--------------|--------------|----------------|--------------|--------------|--------------|-------------|-------------------|--------------------|---------------------------------------------|-------------|----------------|
| 10353181           | -0.68800574  | 0.532026627  | -0.134953538   | -8.59787627  | -1.547971544 | 8.910071712  | 10.62300121 |                   | Lactb2             | lactamase, beta 2 mitochondrion /// zii     | full-length |                |
| 10353420           | 1.620406997  | 3.571632592  | 0.060811008    | -6.354586927 | 1.496507151  | 2.336163727  | 6.817711044 |                   | Mcm3               | minichromosome rr nucleotide binding /      | full-length |                |
| 10354003           | 0.945108111  | 0.700823085  | -0.025335671   | -6.381057958 | 1.067995612  | 1.492002814  | 4.89286009  |                   | Mgat4a             | mannoside acetylgl extracellular region     | full-length |                |
| 10354472           | 1.096688317  | 4.972609226  | -0.320481857   | -3.981673445 | 1.262847229  | 6.138668628  | 6.764435211 |                   | Gls                | glutaminase neuroleological contro          | full-length |                |
| 10354588           | 1.46491064   | 10.83786926  | -0.317822901   | -3.033637799 | 1.494521959  | 10.65226473  | 8.308846166 |                   | Stk17b             | serine/threonine kir nucleotide binding /   | full-length |                |
| 10354768           | 1.091393952  | 3.806670901  | 0.083653963    | -6.231178029 | 0.815462021  | 0.486796789  | 7.973761064 |                   | Akr1b3             | aldo-keto reductase aldehyde reductase      | full-length |                |
| 10355162           | 1.152675424  | 1.960371794  | 0.247095105    | -5.566749701 | 1.014798475  | 0.361323767  | 5.673447408 |                   | Plekhh3            | pleckstrin homolog; intracellular signalir  | full-length |                |
| 10356020           | 1.865246671  | 10.11537985  | 0.098354227    | -6.164735859 | 1.659987366  | 8.300379508  | 6.989028641 |                   | Dock10             | dedicator of cytokin guanyl-nucleotide e    | full-length |                |
| 10356082           | 0.553155346  | -3.21849284  | 0.035106609    | -6.369913882 | 1.099866905  | 2.08600168   | 8.757588006 | Cluster IV        | Plscr1             | phospholipid scram calcium ion binding      | full-length |                |
| 10356248           | 0.869490439  | 8.300054267  | 0.169772364    | -4.402490107 | 1.076243774  | 10.4037186   | 4.76004335  |                   | C130026121Rik ///  | RIKEN cDNA C130 ---                         | full-length |                |
| Affymetrix ID      | BS/Non Inf.  | LS/Non Inf.  | RelNF/Non Inf. | Average      | Cluster      | Gene         | Gene        | Gene Ontology (GC | Transcript         |                                             |             |                |
| Transcript Cluster | logFC        | B            | logFC          | B            | logFC        | B            | expression  | Number            | Symbol             | Title                                       | Description | Classification |
| 10356269           | 0.923575905  | -2.532104671 | 0.075702059    | -6.346734144 | 1.195167635  | -0.896646034 | 6.380586917 |                   | A530032D15Rik      | RIKEN cDNA A530 ---                         |             | full-length    |
| 10356278           | 1.135509064  | 8.92492463   | 0.256884186    | -3.612150977 | 1.427116847  | 11.22217422  | 6.950308132 | Cluster IV        | Sp110 /// MGC118   | Sp110 nuclear bod; DNA binding /// binc     |             | full-length    |
| 10356293           | 1.29886182   | 8.832593564  | 0.40383995     | -1.926843486 | 1.257892917  | 8.021437883  | 5.615639076 |                   | A630001G21Rik      | RIKEN cDNA A630 ---                         |             | full-length    |
| 10356593           | -1.108556479 | 3.457428402  | -0.155972915   | -5.897857779 | -1.477516015 | 6.219126636  | 7.862908758 |                   | Hes6               | hairy and enhancer DNA binding /// trar     |             | full-length    |
| 10356762           | -0.488662795 | -6.097090524 | -0.825587163   | -3.532697959 | -1.076411999 | -3.117384936 | 6.217143022 |                   | 100043821 /// 1000 | predicted gene, 10( ---                     |             | est            |
| 10357003           | -0.381223971 | -6.393638041 | 0.202990275    | -6.134720024 | -1.362877505 | -0.696793284 | 6.758321153 |                   | Rnf152             | ring finger protein 1 protein binding /// z |             | full-length    |
| 10357242           | -0.549853945 | -4.593855377 | 0.005344403    | -6.391486617 | -1.053276575 | -0.696939613 | 11.7567844  |                   | Dbi                | diazepam binding ii acyl-CoA binding ///    |             | full-length    |
| 10357261           | 4.526537759  | 17.07484221  | 0.233843469    | -5.700442254 | 4.310452098  | 16.17993199  | 9.380993706 |                   | Marco              | macrophage recept receptor activity /// :   |             | full-length    |
| 10357298           | -0.488662795 | -6.097090524 | -0.825587163   | -3.532697959 | -1.076411999 | -3.117384936 | 6.217143022 |                   | 100043821 /// 1000 | predicted gene, 10( ---                     |             | est            |
| 10357332           | 0.872655299  | 6.257582797  | 0.12059409     | -5.618529154 | 1.034816739  | 7.802282788  | 10.28407466 |                   | Actr3              | ARP3 actin-related nucleotide binding /     |             | full-length    |
| 10357436           | 1.963521823  | 7.583204295  | 0.066898253    | -6.329278606 | 1.761095853  | 5.895875753  | 7.150609625 |                   | Mcm6               | minichromosome rr nucleotide binding /      |             | full-length    |
| 10357472           | 1.269732834  | 8.768783458  | -0.1878545     | -6.377311439 | 2.039226378  | 13.99596486  | 6.988309214 |                   | Cxcr4              | chemokine (C-X-C patterning of blood        |             | full-length    |
| 10357604           | 1.452698965  | 5.903257289  | -0.016276289   | -6.386718335 | 2.184763448  | 10.25673191  | 8.603072906 |                   | Ikbke              | inhibitor of kappaB nucleotide binding /    |             | full-length    |
| 10357875           | 1.820055808  | 0.11500494   | 0.274601404    | -6.099217696 | 1.695533034  | -0.845038051 | 6.818474213 |                   | Btg2               | B-cell translocation protein binding /// tr |             | full-length    |
| 10357878           | 0.963253546  | -3.794594483 | -0.176076967   | -6.244602029 | 1.735995154  | 0.187034967  | 7.161137143 | Cluster IV        | Adora1             | adenosine A1 recep adenosine receptor       |             | full-length    |
| 10358027           | 0.664333066  | -4.926673837 | 0.146848774    | -6.258821933 | 1.131375739  | -2.232432656 | 5.272792099 |                   | Elf3               | E74-like factor 3 DNA binding /// trar      |             | full-length    |
| 10358224           | 2.579933642  | 14.87817004  | 0.173498235    | -5.601379677 | 2.608336334  | 14.62734008  | 8.427281409 | Cluster VI        | Ptprc              | protein tyrosine phc activation of MAPK     |             | full-length    |
| 10358389           | 1.578881287  | 3.646778056  | 0.019463212    | -6.387709407 | 1.208079639  | 0.568838403  | 6.440332482 |                   | Rgs2               | regulator of G-prote signal transducer a    |             | full-length    |
| 10358408           | 0.920727537  | -2.083180418 | -0.471844374   | -6.444021144 | 1.077097369  | -1.198922602 | 5.267976285 |                   | Rgs1               | regulator of G-prote signal transducer a    |             | full-length    |
| 10358434           | 2.059111457  | 11.14202971  | 0.030870844    | -6.369631359 | 1.993117365  | 10.32807003  | 7.00380142  |                   | Pla2g4a            | phospholipase A2, phospholipase activ       |             | full-length    |
| 10358454           | 1.812480084  | 1.721865529  | 0.03895128     | -6.383256522 | 2.101723556  | 2.829483671  | 10.23263092 |                   | Rbm3               | RNA binding motif i nucleotide binding /    |             | full-length    |
| 10358476           | 1.379392915  | 6.202294558  | 0.139347025    | -5.971022388 | 1.921470187  | 9.654226163  | 8.433181645 |                   | Prg4               | proteoglycan 4 (me extracellular region     |             | full-length    |
| 10359161           | 1.945498921  | 12.69735625  | 0.311962195    | -3.730795685 | 2.047679482  | 12.89993494  | 7.781374022 |                   | Soat1              | sterol O-acyltransfe sterol O-acyltransfe   |             | full-length    |
| 10359582           | 0.763183298  | -6.566799093 | -0.33640944    | -6.250606425 | 2.239576201  | -3.015820247 | 8.760436618 |                   | Fmo2               | flavin containing mc magnesium ion bin      |             | full-length    |
| 10359593           | 2.369822837  | -4.969049554 | 0.093358349    | -6.38761594  | 4.832316558  | -0.926295075 | 6.589762045 |                   | Fmo3               | flavin containing mc monooxygenase ac       |             | full-length    |
| 10359642           | -0.488662795 | -6.097090524 | -0.825587163   | -3.532697959 | -1.076411999 | -3.117384936 | 6.217143022 |                   | 100043821 /// 1000 | predicted gene, 10( ---                     |             | est            |
| 10359890           | 2.188209014  | 3.088687425  | 0.061358334    | -6.372806062 | 1.754502657  | 0.514259396  | 5.670234685 |                   | Nuf2               | NUF2, NDC80 kine chromosome, centr          |             | full-length    |
| 10359970           | 0.789262932  | -2.728299611 | 0.152339065    | -6.159353033 | 1.054601546  | -0.873397667 | 6.628030778 |                   | Nos1ap             | nitric oxide synthas PDZ domain bindin      |             | full-length    |
| 10360040           | 1.315938931  | 6.835291013  | -0.063282427   | -6.282707146 | 1.149575594  | 4.872577046  | 7.178272194 | Cluster I         | Fcgr3              | Fc receptor, IgG, lo antibody-dependen      |             | full-length    |
| 10360070           | 2.547024871  | 14.06393917  | 0.2510721      | -4.985737813 | 2.622844323  | 14.01947442  | 10.10560572 | Cluster VI        | Fcgr1g             | Fc receptor, IgE, hi positive regulation    |             | full-length    |
| 10360158           | 2.332627992  | 14.53317849  | 0.080131645    | -6.188239089 | 2.310602555  | 14.03489461  | 6.714514011 |                   | Ly9                | lymphocyte antigen protein binding /// c    |             | full-length    |
| 10360173           | 2.252196952  | 3.221698512  | -0.480984069   | -5.349661773 | 2.864306529  | 5.43212602   | 5.47419144  |                   | Slamf7             | SLAM family memt receptor activity /// i    |             | full-length    |
| 10360306           | 2.077551657  | 9.355413266  | -0.197062217   | -5.765270951 | 2.763899434  | 12.34053829  | 6.205779542 |                   | Slamf8             | SLAM family memt membrane /// integr        |             | full-length    |
| 10360328           | 1.347003667  | -0.940922403 | 0.056457287    | -6.373757653 | 2.137773995  | 3.041491689  | 10.1162751  |                   | Apcs               | serum amyloid P-cx calcium ion binding      |             | full-length    |
| 10360367           | 1.151856355  | 1.81323835   | 1.178350132    | 2.484207364  | 1.7610862    | 5.960798547  | 6.198808716 |                   | ---                | ---                                         |             | partial        |
| 10360370           | 1.145955613  | -3.02483614  | 0.356977878    | -5.852968498 | 0.637235509  | -5.808802792 | 4.070470875 |                   | BC094916           | cDNA sequence BC protein binding /// n      |             | full-length    |
| 10360373           | 1.071424452  | -2.210477258 | 1.389919613    | 0.466021514  | 1.621751532  | 0.908252189  | 4.98433849  |                   | ---                | ---                                         |             | partial        |
| 10360377           | 1.647610747  | 5.456112424  | 0.886601735    | -0.091752475 | 2.04723578   | 7.521415775  | 8.119960418 |                   | AI607873           | expressed sequenc ---                       |             | full-length    |
| 10360382           | 1.758429232  | 7.172285646  | 0.947215281    | 1.155794289  | 1.978064747  | 8.116221071  | 7.764202583 |                   | Mnda /// Ifi204    | myeloid cell nuclea transcription cofact    |             | full-length    |
| 10360391           | 0.87578147   | -2.242859167 | 1.022394879    | -0.408489897 | 1.070141006  | -1.026252448 | 7.600846508 |                   | Ifi203             | interferon activated protein binding /// n  |             | full-length    |
| 10360406           | 2.975243539  | 8.612193504  | 0.667704224    | -3.764111831 | 3.54843202   | 10.27631824  | 6.758379305 |                   | Ifi205             | interferon activated protein binding /// n  |             | full-length    |
| 10360506           | 1.086485113  | 4.229990997  | 0.039557383    | -6.352234248 | 1.050079467  | 3.448331077  | 6.251975011 | Cluster III       | Akt3               | thymoma viral protc nucleotide binding /    |             | full-length    |
| 10360631           | -0.334255269 | -6.187614199 | -0.029165998   | -6.38298082  | -1.251190712 | 0.713158533  | 10.58090668 |                   | Cabc1              | chaperone, ABC1 ε nucleotide binding /      |             | full-length    |

| 10361065           | 1.021558326  | 9.833413408  | 0.036670075   | -6.290455906 | 1.229659351  | 11.6238222   | 7.104265134  | Cluster IV        | Mfsd7b             | major facilitator sup in utero embryonic     | full-length |                |
|--------------------|--------------|--------------|---------------|--------------|--------------|--------------|--------------|-------------------|--------------------|----------------------------------------------|-------------|----------------|
| 10361091           | 1.674577616  | 2.134704173  | 0.163999254   | -6.201950598 | 2.057733114  | 3.885549776  | 6.493619283  |                   | Atf3               | activating transcript DNA binding /// trar   | full-length |                |
| 10361110           | 1.093713695  | 2.102786385  | 0.144630165   | -6.051862863 | 0.711368331  | -2.025103631 | 5.019566964  |                   | Dtl                | denticleless homolok nucleus /// cytoplas    | full-length |                |
| 10361133           | 1.270400628  | 3.490397665  | -0.08169506   | -6.284784032 | 1.615537793  | 5.718403967  | 6.621638214  |                   | ---                | ---                                          | ---         |                |
| 10361246           | -1.75170692  | 4.275116517  | -1.118186675  | 0.425096     | -2.251807281 | 6.676837589  | 7.833937967  |                   | G0s2               | G0/G1 switch gene cell cycle                 | full-length |                |
| 10361375           | 1.755301447  | 2.168553775  | 0.45695988    | -5.149253852 | -1.063411423 | 5.455597213  | 5.455597213  | Cluster I         | Fbxo5              | F-box protein 5 mitotic metaphase /          | full-length |                |
| 10361790           | 1.040729629  | 0.466361906  | 0.01122691    | -6.390137714 | 0.731817461  | -2.672183103 | 7.423174497  |                   | Fuca2              | fucosidase, alpha-L catalytic activity /// t | full-length |                |
| 10361807           | 0.887436856  | 0.854722358  | 0.179105892   | -5.791389203 | 1.120879743  | 2.783145423  | 5.959132819  |                   | Hivep2             | human immunodeficiency nucleic acid binding  | full-length |                |
| 10361887           | -0.689250152 | 2.114803956  | -0.105101445  | -5.942570265 | -1.15350809  | 7.35416531   | 9.413311509  |                   | Perp               | PERP, TP53 apopt protein binding /// r       | full-length |                |
| 10362091           | -0.51324539  | -5.169196626 | -0.162906674  | -6.154990654 | -1.849444783 | 4.077323332  | 7.61060347   |                   | Raet1d /// Raet1e  | retinoic acid early t plasma membrane        | full-length |                |
| 10362129           | 0.487609316  | -4.263344469 | 0.179583748   | -5.906685703 | 1.166097385  | 2.022981371  | 10.41536753  |                   | Vnn3               | vanin 3 extracellular space                  | full-length |                |
| 10362138           | -1.634332453 | 2.246424186  | -0.24072564   | -5.960956874 | -1.839373457 | 3.06586999   | 9.223019333  |                   | Vnn1               | vanin 1 acute inflammatory                   | full-length |                |
| 10362350           | 1.209549714  | 2.180574811  | 0.11380783    | -6.214781546 | 1.078234223  | 0.679443774  | 4.57014725   |                   | E430004N04Rik      | RIKEN cDNA E430 ---                          | full-length |                |
| 10362379           | -0.740247154 | -1.957657115 | -0.109991365  | -6.219360426 | -1.399339862 | 3.509962107  | 8.903988682  |                   | Echdc1             | enoyl Coenzyme A catalytic activity /// t    | full-length |                |
| 10362538           | -0.646404854 | -3.491254958 | -0.173009186  | -6.045660615 | -1.09355326  | 0.103497855  | 5.887827853  |                   | Lama4              | laminin, alpha 4 blood vessel develk         | full-length |                |
| 10362596           | 1.046466734  | 0.987280822  | -0.086459512  | -6.284241421 | 0.857183867  | -1.124638987 | 7.675973755  | Cluster III       | Fyn                | Fyn proto-oncogene nucleotide binding /      | full-length |                |
| 10362896           | 1.010778356  | -1.943995819 | -0.560584606  | -4.320939134 | 0.793963923  | -3.775034488 | 5.84573092   | Cluster III       | Cd24a              | CD24a antigen response to hypoxia            | full-length |                |
| 10362904           | -0.610620913 | -1.457964983 | -0.098446486  | -6.16118027  | -1.071905703 | 3.424141321  | 8.3807565767 | Cluster X         | Rtn4ip1            | reticulon 4 interacti protein binding /// r  | full-length |                |
| 10363005           | -0.488662795 | -6.097090524 | -0.825587163  | -3.532697959 | -1.076411999 | -3.117384936 | 6.217143022  |                   | LOC280487          | pol polyprotein ---                          | partial     |                |
| 10363070           | 3.489822096  | 9.876060996  | 0.326670844   | -5.727656711 | 4.126552251  | 11.45311271  | 7.562396819  |                   | Gp49a              | glycoprotein 49 A membrane /// integr        | full-length |                |
| 10363082           | 2.794059814  | 7.532401052  | 0.21255272    | -6.088575369 | 3.394983507  | 9.398446859  | 7.256798107  | Cluster VI        | Lilrb4             | leukocyte immunog receptor activity /// i    | full-length |                |
| Affymetrix ID      | BS/Non Inf.  | LS/Non Inf.  | ReIN/Non Inf. | Average      | Cluster      | Gene         | Gene         | Gene Ontology (GC | Transcript         |                                              |             |                |
| Transcript Cluster | logFC        | B            | logFC         | B            | logFC        | B            | expression   | Number            | Symbol             | Title                                        | Description | Classification |
| 10363161           | 1.591120189  | 6.88086314   | 0.100984784   | -6.201482788 | 1.659545777  | 6.936467473  | 7.047246907  |                   | ---                | ---                                          | ---         | partial        |
| 10363475           | 1.189894173  | -0.770349478 | 0.351689864   | -5.517933047 | 1.538587996  | 1.183020383  | 5.976169472  |                   | Prf1               | perforin 1 (pore form calcium ion binding    | full-length |                |
| 10363561           | -0.488662795 | -6.097090524 | -0.825587163  | -3.532697959 | -1.076411999 | -3.117384936 | 6.217143022  |                   | 100043821 /// 1000 | predicted gene, 100 ---                      | ---         | est            |
| 10363669           | 0.543098373  | -5.667227879 | -0.340521201  | -5.727814419 | 1.322457655  | -1.167289663 | 8.936570341  |                   | Dnajc12            | DnaJ (Hsp40) hom molecular_function          | full-length |                |
| 10364262           | 2.826728451  | 16.24887648  | -0.079894243  | -6.205906576 | 2.973509212  | 16.47996796  | 8.480707392  | Cluster VI        | Itgb2              | integrin beta 2 receptor activity /// i      | full-length |                |
| 10364593           | 1.863987541  | 10.26143735  | -0.055613942  | -6.316406268 | 1.868118108  | 9.85939879   | 7.09953153   | Cluster I         | Cnn2               | calponin 2 actin binding /// calr            | full-length |                |
| 10364950           | 1.105789686  | -4.201914788 | -0.14180972   | -6.329457361 | 2.404728971  | 1.20972625   | 8.011268438  |                   | Gadd45b            | growth arrest and C activation of MAPK       | full-length |                |
| 10365482           | 0.574366458  | -0.126839786 | -0.060035708  | -6.25717396  | 1.570778565  | 10.36624007  | 7.852668869  |                   | Timp3              | tissue inhibitor of m enzyme inhibitor ac    | full-length |                |
| 10366476           | -1.354729312 | 3.504230558  | 0.050727062   | -6.355216601 | -2.544360843 | 10.31164239  | 8.322779568  |                   | Ptprb              | protein tyrosine phc protein tyrosine phc    | full-length |                |
| 10366886           | 1.0240414    | 4.432962946  | 0.017081966   | -6.383152745 | 0.931961095  | 3.008474954  | 6.416521213  |                   | Arhgap9            | Rho GTPase activa GTPase activator a         | full-length |                |
| 10367066           | -2.265239313 | 3.66888708   | -0.193218274  | -6.198425349 | -3.269151426 | 7.370115533  | 8.30989025   | Cluster IX        | Sdr9c7             | 4short chain dehyd catalytic activity /// t  | full-length |                |
| 10367634           | 0.932606492  | 2.159433981  | 0.212462986   | -5.42106521  | 1.230785411  | 4.694440457  | 6.511553206  |                   | Akap12             | A kinase (PRKA) ai protein binding /// c     | full-length |                |
| 10367734           | 1.014488874  | 3.420266068  | 0.268527662   | -4.801532655 | 1.048606128  | 3.362041571  | 5.524470178  |                   | Ust                | uronyl-2-sulfotransf Golgi apparatus ///     | full-length |                |
| 10367805           | 1.650803283  | 4.77429189   | 0.002199906   | -6.391732273 | 1.59701093   | 3.992150593  | 5.474218023  |                   | 9130014G24Rik      | RIKEN cDNA 9130 ---                          | partial     |                |
| 10367816           | 1.838134186  | 5.505616267  | 0.104769138   | -6.270527901 | 1.216782423  | 0.795283394  | 5.364307106  |                   | ---                | ---                                          | ---         | predicted      |
| 10368144           | 1.880001717  | -0.141165237 | 0.325852217   | -6.029337638 | 2.899248002  | 3.73822324   | 7.20719571   |                   | Tnfrsf3            | tumor necrosis fact DNA binding /// pro      | full-length |                |
| 10368644           | 1.707112856  | 2.090415316  | 0.200074166   | -6.123929484 | 2.301219589  | 4.853888231  | 6.725260485  |                   | Mar26f             | family with sequenc membrane /// integr      | full-length |                |
| 10368675           | 1.372548595  | 6.2349302    | -0.028293408  | -6.373609094 | 1.268834334  | 4.920684017  | 8.483214743  |                   | Famcs              | myristoylated alanin actin binding /// pro   | full-length |                |
| 10368713           | -0.729881771 | -0.051802218 | -0.080669603  | -6.238910697 | -1.369861596 | 6.035555939  | 9.257790419  |                   | AI317395           | expressed sequenc sugar:hydrogen syr         | full-length |                |
| 10368947           | 1.164132296  | 2.358447877  | 0.586831506   | -2.514625144 | 1.728132635  | 6.244155232  | 8.448273162  |                   | Aim1               | absent in melanom molecular_function         | full-length |                |
| 10369264           | -0.664503812 | -4.498074544 | -0.145277744  | -6.233065128 | -1.872858588 | 3.204607579  | 8.504763706  |                   | Oit3               | oncprotein induce calcium ion binding        | full-length |                |
| 10369290           | 0.797558457  | -6.058145688 | 0.661217888   | -5.550172703 | 2.094584762  | -1.7784914   | 7.882915674  |                   | Ddit4              | DNA-damage-induc molecular_function          | full-length |                |
| 10369541           | 0.902230137  | 4.111263221  | 0.068612148   | -6.224606006 | 1.032014275  | 5.174419469  | 6.363685635  |                   | Hk1                | hexokinase 1 nucleotide binding /            | full-length |                |
| 10369615           | 1.832506603  | 11.36015098  | -0.084495753  | -6.177584313 | 2.036507757  | 12.20430104  | 10.03750933  |                   | Srgn               | serglycin ossification /// prote             | full-length |                |
| 10369815           | 1.526985135  | 1.762301183  | 0.19953856    | -6.081041485 | 0.792120564  | -3.710461741 | 6.320725725  | Cluster III       | Cdc2a              | cell division cycle 2 nucleotide binding /   | full-length |                |
| 10370339           | 1.197304332  | 1.141454085  | 0.138605444   | -6.17553227  | 1.1821282    | 0.647100424  | 6.368579705  |                   | Trpm2              | transient receptor p receptor activity /// i | full-length |                |
| 10370946           | 1.290354763  | 7.790552998  | 0.091132483   | -6.117999678 | 1.364359874  | 8.011843291  | 7.401956996  |                   | Mobkl2a            | MOB1, Mps One Bi protein binding /// z       | full-length |                |
| 10371054           | -0.792592944 | 6.747548816  | -0.312281575  | -1.543713231 | -1.001532463 | 9.058771803  | 9.764962308  |                   | Creb3l3            | cAMP responsive e DNA binding /// trar       | full-length |                |
| 10371591           | 1.18092784   | 5.150213285  | 0.116859855   | -6.054457252 | 0.79095565   | 0.608438401  | 4.785507696  |                   | 4930547N16Rik      | RIKEN cDNA 4930 DNA binding /// nuc          | full-length |                |
| 10371607           | 1.782829489  | 8.375094421  | 0.233546586   | -5.407862883 | 2.28492287   | 10.89748787  | 7.138551976  |                   | 1200002N14Rik      | RIKEN cDNA 1200 lysosome /// autoph          | full-length |                |
| 10371662           | 2.900484713  | 7.616295235  | 0.218421418   | -6.090319858 | 3.230321953  | 8.448960992  | 6.919085471  |                   | Spic               | Spi-C transcription DNA binding /// trar     | full-length |                |
| 10371796           | -0.637548342 | -2.786021194 | -0.102915726  | -6.231268045 | -1.151396731 | 1.806726418  | 7.347246192  |                   | Slc17a8            | solute carrier family transporter activity / | full-length |                |
| 10371846           | 1.231010175  | 7.231056845  | -0.151037827  | -5.667263652 | 1.233488813  | 6.822111734  | 6.894045396  |                   | Apaf1              | apoptotic peptidase nucleotide binding /     | full-length |                |

|          |              |              |               |              |              |              |             |             |                    |                                               |             |
|----------|--------------|--------------|---------------|--------------|--------------|--------------|-------------|-------------|--------------------|-----------------------------------------------|-------------|
| 10371970 | -0.410972989 | -4.248045702 | 0.078744354   | -6.256010746 | -1.654345506 | 7.809346945  | 10.99451669 | Cluster X   | Amdhd1             | amidohydrolase do iron ion binding /// c      | full-length |
| 10372028 | -1.058169955 | 2.398480302  | -0.054300529  | -6.336309284 | -1.483127529 | 5.633603911  | 7.615402266 |             | Plexnc1            | plexin C1 receptor activity /// i             | full-length |
| 10372177 | -0.532103302 | -1.529807826 | -0.345591142  | -3.446203596 | -1.067759855 | 4.779974404  | 6.702880178 |             | Tmtc2              | transmembrane an binding /// membrar          | full-length |
| 10372324 | -0.524425534 | -6.215835438 | -0.100929981  | -6.35023252  | -1.153293513 | -3.476009927 | 7.315046123 |             | Syt1               | synaptotagmin I transporter activity ,        | full-length |
| 10372410 | 1.962854789  | 14.90729117  | -0.075229842  | -6.122958795 | 1.82496027   | 13.66420586  | 5.768514647 |             | Glipr1             | GLI pathogenesis-r extracellular region       | full-length |
| 10372648 | 1.64329724   | 6.325026331  | -0.032906056  | -6.374366025 | 1.43231003   | 4.356750009  | 10.3580629  |             | Lyz2               | lysozyme 2 lysozyme activity ///              | full-length |
| 10372716 | 0.920126308  | 7.341540095  | -0.0819665306 | -5.992443829 | 1.138885077  | 9.4234468345 | 10.67557607 |             | Rap1b              | RAS related protein nucleotide binding /      | full-length |
| 10372781 | 2.105091219  | 8.900567408  | 0.352950236   | -4.724246551 | 2.420479379  | 10.13091087  | 6.98071657  | Cluster VI  | Irak3              | interleukin-1 recept nucleotide binding /     | full-length |
| 10372831 | -0.366265715 | -5.705678145 | -0.374942938  | -4.793464895 | -1.06407414  | 0.231104729  | 5.863238486 |             | Tbc1d30            | TBC1 domain famil Rab GTPase activa           | partial     |
| 10373054 | -0.677718443 | -0.607918476 | -0.254837324  | -4.983276414 | -1.173153616 | 4.406199234  | 5.933289485 |             | Slc26a10           | solute carrier family transporter activity ,  | partial     |
| 10373197 | -1.012609869 | 3.953512817  | -0.321656049  | -4.019567799 | -0.255764436 | -5.790502085 | 9.254078765 |             | Inhbc              | inhibin beta-C hormone activity ///           | full-length |
| 10373325 | -0.858355708 | -0.46298624  | -0.071927876  | -6.311386459 | -1.706323831 | 6.152539739  | 7.546581133 |             | Gpr182             | G protein-coupled r signal transducer a       | full-length |
| 10373334 | -1.392349111 | -4.159252343 | -0.354926384  | -6.144812829 | -3.108649354 | 1.549614482  | 11.02856138 | Cluster IX  | Hsd17b6            | hydroxysteroid (17- catalytic activity /// €  | full-length |
| 10373407 | 1.183128152  | 4.766522979  | -0.13089993   | -5.975228098 | 1.210386106  | 4.596887709  | 7.677344106 |             | Mbc2               | membrane bound C membrane /// integri         | full-length |
| 10374183 | -0.488662795 | -6.097090524 | -0.825587163  | -3.532697959 | -1.076411999 | -3.117384936 | 6.217143022 |             | 100043821 /// 1000 | predicted gene, 10( ---                       | predicted   |
| 10374236 | 1.082967561  | 0.108769141  | -0.078166782  | -6.323746361 | 1.600189571  | 3.581772438  | 6.047462293 |             | Upp1               | uridine phosphoryl catalytic activity /// t   | full-length |
| 10374333 | 1.712968256  | 10.47807967  | 0.010290408   | -6.388603786 | 1.990403633  | 11.85054124  | 6.025749216 | Cluster I   | Ikzf1              | IKAROS family zinc nucleic acid binding       | full-length |
| 10374352 | -0.488662795 | -6.097090524 | -0.825587163  | -3.532697959 | -1.076411999 | -3.117384936 | 6.217143022 |             | 100043821 /// 1000 | predicted gene, 10( ---                       | est         |
| 10374842 | 1.240939914  | 2.843331599  | -0.084037245  | -6.286844123 | 0.825835549  | -1.294966867 | 5.03492856  | Cluster III | Ccdc88a            | coiled coil domain c regulation of proteir    | full-length |
| 10375065 | 1.456871655  | 4.851211078  | 0.438049206   | -3.910302045 | 1.857819427  | 7.191718798  | 5.783462051 |             | Sh3pxd2b           | SH3 and PX domai protein binding /// c;       | full-length |
| 10375083 | 1.47394103   | 5.59971414   | 0.00550984    | -6.391255605 | 1.433739267  | 4.864753323  | 6.743067489 |             | Stk10              | serine/threonine kir nucleotide binding /     | full-length |
| 10375145 | 2.196852134  | 14.89080491  | 0.154794919   | -5.527258491 | 2.311834375  | 7.70870904   | 15.11137589 | Cluster VI  | Lcp2               | lymphocyte cytosol protein binding /// c;     | full-length |
| 10375324 | -0.488662795 | -6.097090524 | -0.825587163  | -3.532697959 | -1.076411999 | -3.117384936 | 6.217143022 |             | 100043821 /// 1000 | predicted gene, 10( ---                       | est         |
| 10375443 | 1.641451406  | 10.12203555  | 0.342129426   | -3.525647257 | 1.753040767  | 10.47997449  | 5.628203496 |             | Havcr2             | hepatitis A virus cel receptor activity /// i | full-length |
| 10375472 | 1.552143994  | 2.11048047   | 0.165447208   | -6.168561526 | 1.134191285  | -1.119213371 | 8.248047736 |             | Timd4              | T-cell immunoglobl membrane /// integri       | full-length |
| 10375515 | 2.163320003  | 8.343374057  | 1.0206651     | 0.87964578   | 2.878337614  | 11.31430543  | 7.98201593  |             | Ifi47 /// Olfr56   | interferon gamma ii endoplasmic reticul       | full-length |
| 10375704 | -0.594441182 | -2.772098413 | -0.217833598  | -5.601141092 | -1.482968028 | 5.271349894  | 7.589326709 |             | 3010026009Rik      | RIKEN cDNA 3010 ---                           | full-length |
| 10376060 | 1.843935277  | 6.317100379  | 0.18700999    | -5.959483611 | 1.93189853   | 6.42150479   | 8.934093717 | Cluster I   | Irf1               | interferon regulator DNA binding /// trar     | full-length |
| 10376094 | -0.624635402 | -3.992569208 | -0.0540101    | -6.360940626 | -1.130227665 | -0.109979543 | 7.852882164 |             | ---                | ---                                           | est         |
| 10376324 | 3.58629976   | 9.882140173  | 2.107233713   | 4.607294086  | 4.783493732  | 12.90275301  | 9.063691189 |             | OTTMUSG000000      | predicted gene, OT ---                        | full-length |
| 10376326 | 2.423222592  | 12.94644092  | 1.803062145   | 8.835895185  | 3.056565883  | 15.29314886  | 10.25251441 |             | Igtp /// Iigp2     | interferon gamma ii GTPase activity /// t     | full-length |

| Affymetrix ID      | BS/Non Inf.  | LS/Non Inf.  | ReIN/Non Inf. | Average      | Cluster      | Gene         | Gene        | Gene Ontology (GC) | Transcript                               |                                            |                |
|--------------------|--------------|--------------|---------------|--------------|--------------|--------------|-------------|--------------------|------------------------------------------|--------------------------------------------|----------------|
| Transcript Cluster | logFC        | B            | logFC         | B            | logFC        | expression   | Number      | Symbol             | Title                                    | Description                                | Classification |
| 10376459           | 0.961331072  | 6.784603893  | 0.111535496   | -5.786359065 | 1.00358155   | 6.850207737  | 6.438140325 | OTTMUSG000000      | predicted gene, OT ---                   | est                                        | est            |
| 10376868           | 1.591914123  | 6.092440238  | 0.281838315   | -5.199372816 | 1.40095067   | 4.23908462   | 6.280057207 | Trpv2              | transient receptor pion channel activity | full-length                                | full-length    |
| 10377265           | 0.942198022  | 0.486583777  | 0.019760394   | -6.385516741 | 1.027666852  | 0.92710934   | 5.781217238 | Pik3r5             | phosphoinositide-3 nucleus /// cytoplas  | full-length                                | full-length    |
| 10377405           | 1.865137577  | 5.143414988  | 0.133920715   | -6.212208372 | 1.428693823  | 1.899420406  | 6.25133693  | Aurkb              | aurora kinase B nucleotide binding /     | full-length                                | full-length    |
| 10377439           | 0.232662313  | -6.99085316  | 0.415530918   | -5.531526463 | 1.157581454  | -2.616593463 | 6.846480927 | Per1               | period homolog 1 (I two-component ser    | full-length                                | full-length    |
| 10378068           | 1.581144999  | 6.385460143  | 1.998100913   | 8.587921138  | 1.848288823  | 7.765228547  | 7.159940547 | Cluster V          | Xaf1                                     | XIAP associated fa nucleus /// cytoplas    | full-length    |
| 10378216           | 1.422618765  | 5.59110259   | 0.21731545    | -5.555746516 | 1.397747953  | 4.967898054  | 5.792143921 | Atp2a3             | ATPase, Ca++ tran nucleotide binding /   | full-length                                | full-length    |
| 10378385           | -1.07461346  | -2.778868455 | -0.000252509  | -6.391790625 | -1.442749025 | -0.897472939 | 6.359157411 | Spata22            | spermatogenesis a ---                    | full-length                                | full-length    |
| 10378572           | -0.705770047 | -4.803373921 | 0.23019386    | -6.088224483 | -1.909553634 | 2.057567954  | 10.40341831 | Tlcd2              | TLC domain contain membrane /// integri  | full-length                                | full-length    |
| 10379511           | 1.966443803  | -1.805702183 | 0.090508217   | -6.374345808 | 3.052353723  | 1.689273299  | 6.598362357 | Cluster VI         | Ccl2                                     | chemokine (C-C m; G-protein-coupled r      | full-length    |
| 10379518           | 1.133878564  | -3.696256706 | 0.07166272    | -6.373371737 | 1.996043296  | 0.136329844  | 6.175795342 | Cluster II         | Ccl7                                     | chemokine (C-C m; cytokine activity /// t  | full-length    |
| 10379530           | 0.791371974  | -3.783133729 | -0.015423917  | -6.390091529 | 1.829506656  | 2.627194333  | 4.578959959 | Cluster II         | Ccl12                                    | chemokine (C-C m; cytokine activity /// t  | full-length    |
| 10379535           | 1.584947677  | 7.125922051  | 0.107671717   | -6.164970074 | 1.69700124   | 7.488912684  | 4.281286028 | Cluster I          | Ccl8                                     | chemokine (C-C m; cytokine activity /// t  | full-length    |
| 10379615           | 0.821428303  | 1.539505649  | 1.055279843   | 4.374243239  | 1.192390482  | 5.060238797  | 7.57563771  |                    | Slfn5                                    | schlafen 5 nucleotide binding /            | full-length    |
| 10379630           | 2.533280086  | 8.816292331  | 0.797448229   | -1.856306275 | 2.862628874  | 9.837658605  | 7.890803406 |                    | Slfn2                                    | schlafen 2 negative regulation             | full-length    |
| 10379633           | 2.058122405  | 0.994984416  | 0.795818624   | -4.367711997 | 2.944921854  | 4.275221911  | 5.999187408 |                    | Slfn1                                    | schlafen 1 G1/S transition of r            | full-length    |
| 10379636           | 1.616899303  | -0.757859217 | 0.27328985    | -6.09189986  | 2.625558883  | 3.518960356  | 5.436920306 |                    | Slfn4                                    | schlafen 4 ---                             | full-length    |
| 10379646           | 0.944728061  | 2.242020862  | 0.558149814   | -1.595456678 | 1.002172616  | 2.446667565  | 5.968986553 |                    | Slfn3                                    | schlafen 3 negative regulation             | full-length    |
| 10379721           | 1.189204782  | -1.786203663 | -0.035181415  | -6.384540312 | 1.322808382  | -1.279876661 | 5.531307805 | Cluster I          | Ccl4                                     | chemokine (C-C m; cytokine activity /// i  | full-length    |
| 10379727           | 1.730466441  | 12.55887777  | 0.150101175   | -5.511781817 | 1.930974581  | 13.45820118  | 9.847081292 |                    | OTTMUSG000000                            | predicted gene, OT ---                     | full-length    |
| 10380566           | -0.89420656  | 3.179791791  | 0.084601416   | -6.175226146 | -1.013180753 | 4.105959481  | 5.871579626 |                    | Phospho1 /// Abi3                        | phosphatase, orph; magnesium ion bin       | full-length    |
| 10380571           | 1.703075558  | 8.768440781  | -0.001720336  | -6.3917234   | 1.600568673  | 7.604699712  | 6.434065744 |                    | Gngt2                                    | guanine nucleotide signal transducer a     | full-length    |
| 10381072           | 1.40332835   | 3.727326683  | 0.328250893   | -5.049644893 | 1.228483902  | 1.941921279  | 6.072626386 | Cluster III        | Cdc6                                     | cell division cycle 6 nucleotide binding / | full-length    |

| 10381387           | -1.195230754 | -0.362150293 | -0.254322056  | -5.878686617 | -2.371967117 | 6.267681109  | 11.83997744 | G6pc          | glucose-6-phospha catalytic activity /// c   | full-length                                 |             |                |
|--------------------|--------------|--------------|---------------|--------------|--------------|--------------|-------------|---------------|----------------------------------------------|---------------------------------------------|-------------|----------------|
| 10381514           | -0.671256707 | -0.689955674 | -0.115432964  | -6.076654319 | -1.373420774 | 6.175937106  | 7.372488574 | Cd300lg       | CD300 antigen like receptor activity /// c   | full-length                                 |             |                |
| 10381588           | 0.800235002  | 6.950372262  | 0.071194392   | -6.018682223 | 1.016219219  | 9.327053297  | 11.47042852 | Gm            | granulin blastocyst hatching                 | full-length                                 |             |                |
| 10381708           | 1.180230383  | 1.975381799  | 0.262133753   | -5.496949833 | 1.405109577  | 3.375636805  | 5.575184047 | Fmn1          | formin-like 1 actin binding /// pro          | full-length                                 |             |                |
| 10381809           | 1.103158855  | 7.367009489  | 0.191495566   | -4.9859428   | 1.426749919  | 9.974346778  | 7.271567779 | Itgb3         | integrin beta 3 receptor activity /// i      | full-length                                 |             |                |
| 10382106           | 1.992028991  | 7.568821326  | 0.325980552   | -5.087704377 | 2.151038093  | 8.035907293  | 6.701270724 | Gm885         | gene model 885, (N extracellular region      | full-length                                 |             |                |
| 10382271           | -0.277664227 | -6.523456235 | -0.001800876  | -6.391758082 | -1.114225444 | -0.428514439 | 7.364389253 | Arsg          | arylsulfatase G catalytic activity /// c     | full-length                                 |             |                |
| 10382438           | 1.34328317   | 10.67344314  | -0.226129352  | -4.218138081 | 1.220631538  | 9.103606688  | 7.15321494  | Cluster I     | Cd300a                                       | CD300A antigen DNA binding /// rec          | full-length |                |
| 10382532           | 1.055830526  | -4.333466296 | -0.477270362  | -5.693782454 | 2.024011731  | -0.203438738 | 7.11095152  | Slc16a5       | solute carrier family ---                    | full-length                                 |             |                |
| 10383152           | 1.418770227  | 6.507303881  | 2.192405812   | 10.50640326  | 2.044228831  | 10.37704321  | 9.644297057 | ---           | ---                                          | partial                                     |             |                |
| 10383168           | 1.490500526  | 6.67682517   | 2.15467087    | 10.05104298  | 2.033536025  | 9.900379192  | 9.837844354 | ---           | ---                                          | partial                                     |             |                |
| 10383192           | 1.35905021   | 4.719314619  | 2.071940942   | 8.959127911  | 2.077220639  | 9.187727499  | 8.684434569 | ---           | ---                                          | partial                                     |             |                |
| 10383194           | 1.391641572  | 4.789091982  | 2.024667161   | 8.580936049  | 1.948620432  | 8.223494762  | 9.864739093 | ---           | ---                                          | partial                                     |             |                |
| 10383196           | 1.567901683  | 6.723583211  | 2.157004688   | 9.643522439  | 1.96193122   | 8.917694279  | 8.892665308 | ---           | ---                                          | partial                                     |             |                |
| 10383198           | 1.61574014   | 6.838241853  | 2.161775081   | 9.481035537  | 2.10055242   | 9.49118417   | 9.823970862 | ---           | ---                                          | partial                                     |             |                |
| 10383200           | 1.574268366  | 6.124748376  | 2.206625429   | 9.33819291   | 2.039170261  | 8.707840906  | 8.952714283 | ---           | ---                                          | partial                                     |             |                |
| 10383202           | 1.623369752  | 8.690550066  | 2.210102957   | 11.02299423  | 2.092909436  | 11.28972542  | 9.977040214 | ---           | ---                                          | partial                                     |             |                |
| 10383204           | 1.547985395  | 7.511593612  | 2.21166423    | 10.57872862  | 2.078258436  | 10.57039772  | 9.081417163 | ---           | ---                                          | partial                                     |             |                |
| 10383206           | 1.579579841  | 6.825879742  | 2.344417795   | 10.39647201  | 2.236424433  | 10.49882322  | 9.365484694 | ---           | ---                                          | partial                                     |             |                |
| 10383208           | 1.255452005  | 0.631817021  | 1.904109723   | 5.060843454  | 1.931205565  | 4.645691756  | 7.767187752 | ---           | ---                                          | partial                                     |             |                |
| 10383210           | 1.35328663   | 6.799857288  | 2.076120554   | 10.6630425   | 2.017349605  | 11.08972709  | 9.491558493 | ---           | ---                                          | partial                                     |             |                |
| 10383212           | 1.460430637  | 6.40381905   | 2.183797038   | 10.13994933  | 2.125101266  | 10.38706652  | 9.905593156 | ---           | ---                                          | partial                                     |             |                |
| 10383214           | 1.403403128  | 7.930134961  | 2.138613293   | 11.42024444  | 1.969024763  | 11.52866311  | 9.841506825 | Rnf213        | ring finger protein 2 ---                    | partial                                     |             |                |
| 10383233           | 1.325744716  | 6.693197561  | 2.008067158   | 10.47307902  | 1.899945089  | 10.50628882  | 9.881494571 | Rnf213        | ring finger protein 2 ---                    | partial                                     |             |                |
| 10383395           | -0.509778151 | -1.397085802 | 0.024269993   | -6.371029983 | -1.016118758 | 4.895077022  | 10.00298178 | Slc25a10      | solute carrier family binding /// mitochon   | full-length                                 |             |                |
| 10383502           | 1.406111692  | 4.943938216  | 0.227526952   | -5.556069307 | 2.262143321  | 10.0415289   | 7.173573762 | Slc16a3       | solute carrier family transporter activity , | full-length                                 |             |                |
| 10383556           | -0.340877279 | -4.87544513  | -0.085035956  | -6.218597911 | -1.007937443 | 2.787015437  | 7.137788823 | BC032265      | cDNA sequence BC kinase activity /// tre     | full-length                                 |             |                |
| 10383564           | -0.61448859  | -0.257887293 | -0.104022915  | -6.054494658 | -1.267579849 | 6.853098886  | 6.636475529 | Fn3k          | fructosamine 3 kinase soluble fraction /// c | full-length                                 |             |                |
| 10384154           | 1.967312651  | 10.83032492  | -0.138384508  | -5.943958918 | 2.050799907  | 10.90309524  | 6.403158349 | Myo1g         | myosin IG nucleotide binding /               | full-length                                 |             |                |
| 10384373           | 1.975806708  | 3.162585665  | 0.312916632   | -5.804256112 | 1.701763906  | 1.258214588  | 5.190272439 | Fignl1        | fidgetin-like 1 nucleotide binding /         | full-length                                 |             |                |
| 10384378           | -0.733861122 | -2.131301216 | -0.098594134  | -6.257001035 | -1.119022157 | 1.08392066   | 9.164559336 | Cluster X     | Ddc                                          | dopa decarboxylase catalytic activity /// c | full-length |                |
| 10384458           | 3.165962824  | 14.67055603  | 0.103335959   | -6.203425002 | 3.752989775  | 16.27588698  | 7.875501065 | Plek          | pleckstrin intracellular signalr             | full-length                                 |             |                |
| 10385118           | 2.180841882  | 9.945359245  | 0.294795069   | -5.063000387 | 2.058639798  | 8.82897407   | 6.924710381 | Cluster I     | Dock2                                        | dedicator of cyto-kii membrane raft pola    | full-length |                |
| 10385236           | 1.091424672  | 3.909354003  | 0.12805245    | -6.01465206  | 0.786205394  | 0.239389138  | 8.125265415 | Akr1b3        | aldo-keto reductase aldehyde reductase       | full-length                                 |             |                |
| 10385248           | 1.289603378  | 2.079562322  | 0.199087121   | -5.93484672  | 1.018511523  | -0.496219458 | 3.892145997 | Hmmr          | hyaluronan mediate receptor activity /// l   | full-length                                 |             |                |
| 10385391           | 1.768715548  | 10.40944604  | 0.122359588   | -5.98683602  | 2.161546179  | 12.38634957  | 6.654200439 | Cyfp2         | cytoplasmic FMR1 molecular_function          | full-length                                 |             |                |
| 10385428           | 1.09630116   | 9.09056877   | 0.067982989   | -6.1283278   | 1.17772544   | 9.510600581  | 5.80265477  | Cluster III   | Itk                                          | IL2-inducible T-cell nucleotide binding /   | full-length |                |
| 10385500           | 1.89722396   | 7.387294162  | 1.545956735   | 5.183620549  | 2.606642781  | 10.71931804  | 10.04014577 | Cluster VI    | Irgm1                                        | immunity-related G nucleotide binding /     | full-length |                |
| 10385504           | 1.570955825  | -0.409868479 | 1.129342508   | -2.149194545 | 1.737524383  | 0.123854686  | 5.701314774 | EG432555      | predicted gene, EG ---                       | full-length                                 |             |                |
| 10385507           | 0.624544378  | 1.911396748  | 0.082886949   | -6.061980009 | 1.09839234   | 7.697454988  | 4.871835754 | ---           | ---                                          | predicted                                   |             |                |
| 10385513           | 1.87147335   | 11.07906977  | 0.827327434   | 2.339016976  | 1.727180237  | 9.694656539  | 7.209400817 | 9930111J21Rik | /// IRIKEN cDNA 9930 ---                     | full-length                                 |             |                |
| Affymetrix ID      | BS/Non Inf.  | LS/Non Inf.  | ReIN/Non Inf. | Average      | Cluster      | Gene         | Gene        | Gene          | Ontology (GC                                 | Transcript                                  |             |                |
| Transcript Cluster | logFC        | B            | logFC         | B            | logFC        | B            | expression  | Number        | Symbol                                       | Title                                       | Description | Classification |
| 10385518           | 4.546315414  | 16.60680771  | 1.885822012   | 6.255855848  | 5.170872358  | 17.72414045  | 9.176843692 | Cluster VIII  | Tgtp                                         | T-cell specific GTP:GTPase activity /// c   | full-length |                |
| 10385526           | 1.814934235  | 10.68956465  | 0.779302152   | 1.781196203  | 1.687242294  | 9.391274569  | 7.152753182 | 9930111J21Rik | /// IRIKEN cDNA 9930 ---                     | full-length                                 |             |                |
| 10385533           | 4.273880337  | 16.52872138  | 1.635440815   | 5.400330775  | 4.968870374  | 17.89159697  | 9.588838281 | Cluster VIII  | Tgtp                                         | T-cell specific GTP:GTPase activity /// c   | full-length |                |
| 10385542           | -0.070151101 | -7.228573715 | -0.093014875  | -6.303769248 | -1.145567281 | -0.142437489 | 6.647123073 | Cluster VIII  | Btnl9                                        | butyrophilin-like 9 membrane /// integr     | full-length |                |
| 10385747           | 0.609016939  | -0.712901442 | 0.147992268   | -5.78034716  | 1.009216143  | 3.794825596  | 6.594592237 | Cluster VIII  | Phf15                                        | PHD finger protein protein binding /// z    | full-length |                |
| 10385814           | -0.803806754 | -0.694799364 | -0.222745146  | -5.604240096 | -1.612201881 | 5.941651306  | 5.970543864 | Cluster VIII  | Leap2                                        | liver-expressed ant extracellular region    | full-length |                |
| 10385872           | -1.355691427 | 6.58797815   | -0.36634407   | -3.711515267 | -0.819101918 | 0.830814953  | 7.326963237 | Cluster X     | Slc22a5                                      | solute carrier family nucleotide binding /  | full-length |                |
| 10385941           | 0.974132651  | 1.654862104  | -0.079748518  | -6.270677366 | 1.173052781  | 3.154185805  | 7.000225866 | Cluster X     | Tnip1                                        | TNFAIP3 interactin nucleus /// cytoplas     | full-length |                |
| 10386652           | -0.996211169 | 3.930222866  | -0.171561116  | -5.60218059  | -1.353678598 | 6.951578396  | 10.68909927 | Cluster X     | Aldh3a2                                      | aldehyde dehydrog aldehyde dehydrog         | full-length |                |
| 10387536           | 2.030701703  | 13.99935585  | 0.074793699   | -6.178372531 | 2.087236709  | 13.931892    | 9.319713129 | Cluster X     | Cd68                                         | CD68 antigen lysosome /// endos             | full-length |                |
| 10387821           | 1.371964504  | 3.117001144  | -0.15153186   | -6.101819317 | 1.186375541  | 1.254658929  | 5.625007224 | Cluster X     | Alox12                                       | arachidonate 12-lip arachidonate 12-lip     | full-length |                |
| 10387890           | 0.990819115  | 1.344020075  | -0.133899396  | -6.086538261 | 1.183769232  | 2.738125304  | 6.997679828 | Cluster IV    | Cxcl16                                       | chemokine (C-X-C low-density lipoprot       | full-length |                |
| 10387985           | 1.133220648  | 1.904214037  | 0.373329116   | -4.588198202 | 1.514570878  | 4.552717001  | 6.00226295  | Cluster IV    | A430084P05Rik                                | RIKEN cDNA A430 membrane /// integr         | full-length |                |

|          |              |              |              |              |              |              |             |             |                    |                       |                        |             |
|----------|--------------|--------------|--------------|--------------|--------------|--------------|-------------|-------------|--------------------|-----------------------|------------------------|-------------|
| 10388254 | -0.924423784 | -0.066490249 | -0.158772845 | -6.029782049 | -1.082751974 | 1.02103159   | 6.99445857  | Cluster X   | Aspa               | aspartoacylase        | aminoacylase activ     | full-length |
| 10388545 | 1.563280718  | 5.874953765  | 0.051834398  | -6.347719357 | 2.005928056  | 8.336088805  | 6.379464514 |             | Abr                | active BCR-related    | guanyl-nucleotide e    | full-length |
| 10388834 | -0.996006349 | 3.708003305  | -0.119470869 | -6.012155086 | -1.125839763 | 4.625815973  | 5.334581833 |             | Slc13a2            | solute carrier family | transporter activity , | full-length |
| 10388958 | 1.947611678  | 14.61597744  | 0.218921957  | -4.465806934 | 1.900282657  | 13.9398213   | 5.944090119 |             | Evi2b /// Evi2a    | ecotropic viral integ | membrane /// integri   | full-length |
| 10389134 | 1.493285921  | 5.309575499  | 1.606629716  | 6.123745662  | 1.434916318  | 4.443909464  | 6.658812368 |             | Slnf9              | schlafen 9            | nucleus                | full-length |
| 10389143 | 1.186781313  | 0.751254378  | 0.809723921  | -1.655485832 | 1.745034567  | 4.290075812  | 5.88579375  |             | Slnf8              | schlafen 8            | ---                    | full-length |
| 10389207 | 3.716420785  | 19.3673981   | -0.31227799  | -3.960604353 | 3.466792941  | 18.35100876  | 8.705297218 |             | Ccl5               | chemokine (C-C m      | cytokine activity ///  | full-length |
| 10389222 | 3.026076712  | 15.04294057  | 0.079962802  | -6.259577713 | 3.34017426   | 15.82161349  | 9.346184162 | Cluster VI  | Ccl6               | chemokine (C-C m      | cytokine activity ///  | full-length |
| 10389231 | 3.683332876  | 5.958010909  | 0.224943937  | -6.241327809 | 4.214842774  | 7.077988055  | 6.760123827 |             | Ccl3               | chemokine (C-C m      | cytokine activity ///  | full-length |
| 10389261 | 0.001174274  | -7.279970578 | 0.072915931  | -6.315146967 | -1.263014481 | 2.456286747  | 7.233731466 |             | OTTMUSG000000      | predicted gene, OT    | membrane /// integri   | partial     |
| 10389606 | 1.164228284  | -0.712097807 | 0.167480865  | -6.170804287 | 0.857750529  | -3.235842233 | 5.093231743 |             | Prr11              | proline rich 11       | ---                    | full-length |
| 10390186 | 1.294572607  | 1.131487866  | 0.101216438  | -6.292453201 | 1.231112258  | 0.291784605  | 7.417077977 | Cluster III | Abi3               | ABI gene family, m    | molecular_function     | full-length |
| 10390640 | 1.742359822  | 6.121824829  | -0.137820004 | -6.134166337 | 1.876718523  | 6.543531527  | 5.273988617 |             | Ikzf3              | IKAROS family zinc    | nucleic acid binding   | full-length |
| 10390691 | -0.803763522 | -5.495063916 | -0.310089453 | -6.101455779 | -2.20259578  | 0.344776126  | 9.463424518 |             | Nr1d1 /// Thra     | nuclear receptor su   | DNA binding /// trar   | full-length |
| 10390707 | 2.774201802  | 5.731240285  | 0.261495857  | -6.052437602 | 2.434168612  | 3.860717015  | 6.535280504 |             | Top2a              | topoisomerase (DN     | nucleotide binding /   | full-length |
| 10391207 | 0.786058486  | 4.391660712  | 1.731465742  | 11.88019373  | 0.886289086  | 5.301715261  | 7.698706802 |             | Dhx58              | DEXH (Asp-Glu-X-I     | nucleotide binding /   | full-length |
| 10391301 | 0.777641281  | 1.722013077  | 0.280568908  | -4.347442513 | 1.057840044  | 4.54479799   | 10.18687501 | Cluster II  | Stat3              | signal transducer a   | temperature homeoc     | full-length |
| 10391461 | 1.42091858   | 9.015926383  | 0.160499497  | -5.565966602 | 1.390575661  | 8.327973051  | 5.29610825  |             | Bra1               | breast cancer 1       | condensed chromo       | full-length |
| 10392142 | 0.916798156  | -0.008067696 | -0.444486993 | -3.926278691 | 1.121382105  | 1.50418196   | 6.093784094 |             | Cd79b              | CD79B antigen         | transmembrane rec      | full-length |
| 10392522 | -0.977191331 | -3.073158683 | -0.136005362 | -6.282258866 | -1.354364023 | -1.013591263 | 9.924223409 |             | Abca8a             | ATP-binding casse     | nucleotide binding /   | full-length |
| 10392796 | 1.168013368  | 3.311884815  | 0.108847487  | -6.176332493 | 1.253312408  | 3.652527883  | 5.595038043 |             | Cd300lb            | CD300 antigen like    | receptor activity ///  | full-length |
| 10392808 | 1.451453647  | 2.779988711  | -0.042090474 | -6.37265396  | 1.215462683  | 0.642803467  | 7.657685187 | Cluster I   | 4732429D16Rik      | RIKEN cDNA 4732       | receptor activity ///  | full-length |
| 10392815 | 1.711074121  | 11.98604065  | 0.076017385  | -6.170995216 | 1.732503323  | 11.71831981  | 7.336673965 | Cluster I   | Cd300a /// AF2517  | CD300A antigen ///    | DNA binding /// rec    | full-length |
| 10392825 | 1.138292597  | 4.835141703  | 0.028551094  | -6.370801478 | 1.070260306  | 3.743326226  | 6.555058249 |             | RP23-331L12.8 ///  | CMRF-35-like mole     | molecular_function     | full-length |
| 10392834 | 1.086404843  | 4.339119619  | -0.042103909 | -6.346087178 | 1.103433823  | 4.091269021  | 6.607936086 |             | CD23-331L12.8 ///  | CMRF-35-like mole     | molecular_function     | full-length |
| 10392839 | 2.595166456  | 14.80435953  | -0.118924858 | -6.01732804  | 2.77867661   | 15.22357452  | 8.049746496 | Cluster VI  | Cd300e             | CD300e antigen        | receptor activity ///  | full-length |
| 10392845 | 2.394464465  | 5.669463728  | 0.335926505  | -5.670238858 | 3.218570833  | 8.671290607  | 6.547312912 | Cluster VI  | Cd300f             | CD300 antigen like    | receptor activity ///  | full-length |
| 10393341 | 1.149121609  | 4.773528908  | 0.138608494  | -5.928036632 | 1.322266484  | 5.92524287   | 7.661117494 |             | Rhbf2              | rhomboid 5 homolo     | endoplasmic reticul    | full-length |
| 10393449 | 0.773793266  | -1.327426713 | 0.056670133  | -6.341897585 | 1.119473844  | 1.608358209  | 6.989372155 | Cluster III | Socs3              | suppressor of cyto    | regulation of cell gr  | full-length |
| 10393754 | 1.76581318   | 15.22034632  | 0.054534265  | -6.206338935 | 1.962221976  | 11.50216721  | 16.07704213 | Cluster I   | Actg1              | actin, gamma, cyto    | nucleotide binding /   | full-length |
| 10394054 | 1.138933719  | 3.636753121  | 0.01336199   | -6.388100847 | 0.783656441  | -0.392064577 | 5.983748651 |             | Cd7                | CD7 antigen           | receptor activity ///  | full-length |
| 10394068 | 1.194806982  | -0.716258774 | 0.560962999  | -4.358271053 | 1.124746572  | -1.533316933 | 5.059150181 |             | Sectm1a            | secreted and trans    | extracellular region   | full-length |
| 10394593 | 2.213459504  | 12.79084346  | 0.450407523  | -2.481493985 | 2.348283286  | 13.08903361  | 7.819887087 |             | Fam49a             | family with sequenc   | ---                    | full-length |
| 10394674 | -1.78352182  | -1.779570122 | -1.903208928 | -0.608438617 | -0.806442524 | -5.880105734 | 8.610149583 |             | ---                | ---                   | ---                    | partial     |
| 10394978 | 1.422706486  | 2.329722983  | 0.154469197  | -6.150267775 | 1.032896095  | -0.995206251 | 7.3537293   |             | Rrm2               | ribonucleotide redu   | ribonucleoside-diph    | full-length |
| 10395039 | 0.785167927  | -1.769653404 | 2.097353396  | 7.791693477  | 1.424408161  | 3.340787627  | 7.435309179 |             | Cmpk2              | cytidine monophos     | nucleotide binding /   | full-length |
| 10395259 | 1.147507637  | 1.122438025  | 0.682585815  | -2.275930359 | 2.121606291  | 7.336951906  | 9.953764182 |             | Nampt              | nicotinamide phosph   | cytoplasm /// NAD t    | full-length |
| 10395273 | 1.434576677  | -1.136793428 | 1.045593913  | -2.586198095 | 1.882236995  | 0.894947699  | 6.321739011 |             | Gdap10             | ganglioside-induce    | ---                    | full-length |
| 10395275 | -0.488662795 | -6.097090524 | -0.825587163 | -3.532697959 | -1.076411999 | -3.117384936 | 6.217143022 |             | 100043821 /// 1000 | predicted gene, 10    | ---                    | est         |
| 10395770 | 0.88012766   | 2.629449619  | 0.144009567  | -5.824810786 | 1.044751718  | 4.03732745   | 7.199263659 |             | Srp54c /// 1700047 | signal recognition p  | ---                    | full-length |
| 10395780 | 0.88012766   | 2.629449619  | 0.144009567  | -5.824810786 | 1.044751718  | 4.03732745   | 7.199263659 |             | Srp54c /// 1700047 | signal recognition p  | ---                    | full-length |
| 10395805 | 0.857542087  | 0.778533572  | 0.190979028  | -5.678863099 | 1.053741675  | 2.415419716  | 8.681631134 |             | 1700047117Rik1     | RIKEN cDNA 1700       | ---                    | full-length |
| 10396402 | 1.071638349  | 3.567697856  | 0.12287853   | -6.052783996 | 0.883471046  | 1.204768584  | 7.291487619 | Cluster III | Prkch              | protein kinase C, et  | nucleotide binding /   | full-length |
| 10396919 | 0.627693376  | -4.51854092  | 0.386769507  | -5.236817828 | 1.480509428  | 1.34874753   | 8.8702687   |             | 4933426M11Rik      | RIKEN cDNA 4933       | ---                    | full-length |
| 10397145 | -0.785886437 | 1.715537389  | -0.34024313  | -3.624202176 | -1.405160143 | 7.659544487  | 7.820804004 | Cluster X   | Acot2              | acyl-CoA thioester    | carboxylesterase ac    | full-length |
| 10397148 | -2.679519424 | 6.530530195  | -0.54174295  | -4.770249546 | -3.901762127 | 10.52782823  | 6.949443915 |             | Acot1              | acyl-CoA thioester    | long-chain fatty acic  | full-length |
| 10397346 | 0.609271995  | -4.869318125 | 0.355101232  | -5.495958959 | 1.020338138  | -2.250238417 | 6.13773868  |             | Fos                | FBJ osteosarcoma      | DNA binding /// trar   | full-length |
| 10397359 | 1.023215347  | 5.934855567  | -0.235162539 | -4.539232816 | 0.959111414  | 4.78198452   | 5.964798568 |             | Batf               | basic leucine zippe   | DNA binding /// trar   | full-length |
| 10397541 | 0.514786118  | -5.27349734  | 0.016220665  | -6.389525982 | 1.001801681  | -1.939870303 | 9.123939191 |             | Eif1a /// EG266459 | eukaryotic translati  | RNA binding /// trar   | full-length |
| 10397543 | 0.608812509  | -4.836788785 | -0.030946735 | -6.384367374 | 1.102969378  | -1.607158422 | 9.157370996 |             | Eif1a /// EG266459 | eukaryotic translati  | RNA binding /// trar   | full-length |
| 10397645 | 2.130857952  | 12.58583067  | -0.093897929 | -6.151396124 | 2.343083731  | 13.31014553  | 6.70528544  |             | Gpr65              | G-protein coupled r   | signal transducer a    | full-length |

| Affymetrix ID      | BS/Non Inf.  | LS/Non Inf.  | ReIN/Non Inf. | Average      | Cluster      | Gene         | Gene        | Gene Ontology (GC | Transcript           |                                         |             |                |
|--------------------|--------------|--------------|---------------|--------------|--------------|--------------|-------------|-------------------|----------------------|-----------------------------------------|-------------|----------------|
| Transcript Cluster | logFC        | B            | logFC         | B            | logFC        | B            | expression  | Number            | Symbol               | Title                                   | Description | Classification |
| 10398011           | -4.236418831 | 5.376953055  | -0.384729327  | -6.094998667 | -4.724305998 | 6.18582556   | 7.794616807 |                   | Serpina4-ps1         | serine (or cysteine) ---                |             | full-length    |
| 10398039           | 3.024887823  | 13.52453352  | 0.836000377   | 0.071615834  | 3.302049243  | 14.16722273  | 8.690266092 |                   | Serpina3g /// Serpir | serine (or cysteine) endopeptidase inhi |             | full-length    |
| 10398069           | 0.65095769   | -4.996485966 | 0.17085164    | -6.211545304 | 1.354842259  | -0.814721316 | 11.97186424 |                   | Serpina3m            | serine (or cysteine) endopeptidase inhi |             | full-length    |

|          |              |              |              |              |              |              |             |                         |                                                               |                                         |             |
|----------|--------------|--------------|--------------|--------------|--------------|--------------|-------------|-------------------------|---------------------------------------------------------------|-----------------------------------------|-------------|
| 10398075 | 0.748148429  | -3.85597004  | 0.177316848  | -6.151647049 | 1.294419992  | -0.27651097  | 12.42849654 | Serpina3n               | serine (or cysteine) endopeptidase inhil                      | full-length                             |             |
| 10398267 | 1.328113799  | 6.655897573  | 0.201848204  | -5.40605402  | 1.67139821   | 8.915702252  | 7.749627151 | Evl                     | Ena-vasodilator stir actin binding /// pro                    | full-length                             |             |
| 10398299 | -0.414113476 | -2.189107046 | -0.20713247  | -4.759823898 | -1.042064259 | 6.336871498  | 12.00415093 | Al132487                | expressed sequenc transporter activity ,                      | full-length                             |             |
| 10398665 | 1.395080545  | 6.346715589  | -0.31897107  | -4.437423227 | 1.431343308  | 6.210618629  | 8.046413842 | Tnfaip2                 | tumor necrosis fact angiogenesis /// mu                       | full-length                             |             |
| 10398907 | 2.196906967  | 11.39213238  | 0.287734017  | -4.83075924  | 1.988957712  | 9.779246239  | 7.792405489 | Pld4                    | phospholipase D fa catalytic activity /// r                   | full-length                             |             |
| 10399005 | 1.842722128  | 10.4411117   | -0.098534411 | -6.14552749  | 1.595845627  | 8.301758115  | 7.507792165 | Crip1                   | cysteine-rich protei zinc ion binding /// r                   | full-length                             |             |
| 10399087 | 2.356759165  | 5.831690596  | 0.113892433  | -6.299233731 | 1.671018599  | 1.738825877  | 5.411149749 | Ncapg2                  | non-SMC condens inner cell mass cell                          | full-length                             |             |
| 10399178 | 1.127067018  | 0.335031041  | 0.125455748  | -6.222959443 | 1.071082224  | -0.47018502  | 5.622974669 | Cdca7l                  | cell division cycle a protein binding /// n                   | full-length                             |             |
| 10399354 | -0.366255893 | -5.727432216 | -0.070370004 | -6.329168453 | -1.100725263 | 0.469744695  | 6.011129199 | ---                     | ---                                                           | est                                     |             |
| 10399360 | 0.614127492  | -3.247146272 | 0.004575843  | -6.391491767 | 1.037108548  | 0.461916687  | 7.695296935 | Rhob                    | ras homolog gene f nucleotide binding /                       | full-length                             |             |
| 10399457 | 1.137965692  | 5.430766007  | 0.017209863  | -6.383292704 | 0.838680136  | 1.770338843  | 7.990043937 | Akr1b3                  | aldo-keto reductase aldehyde reductase                        | full-length                             |             |
| 10399540 | 1.426207631  | 8.458097486  | 0.199326442  | -5.268516067 | 1.260744555  | 6.585677966  | 6.026872392 | Pqlc3                   | PQ loop repeat con membrane /// integri                       | full-length                             |             |
| 10399710 | 1.240784794  | -0.157267941 | 2.363898115  | 6.433481636  | 2.023616548  | 4.32671077   | 8.643245448 | Rsad2                   | radical S-adenosyl catalytic activity /// i                   | full-length                             |             |
| 10399924 | 1.740633292  | -11.10230928 | 0.00089324   | -6.391765136 | 1.874917551  | 11.57004594  | 6.058329615 | Pik3cg                  | phosphoinositide-3- inositol or phosphat                      | full-length                             |             |
| 10400023 | 1.28835144   | 0.936101917  | -0.237037464 | -5.88057061  | 1.13988572   | -0.527390172 | 7.295455465 | Tspan13                 | tetraspanin 13 membrane /// integri                           | full-length                             |             |
| 10400357 | 0.708757144  | -0.140400459 | 0.205382859  | -5.425680148 | 1.012749728  | 2.929153795  | 7.299846646 | Baz1a                   | bromodomain adjac nuclear chromosom                           | full-length                             |             |
| 10400510 | -1.29696058  | 3.316803279  | -0.318007458 | -5.028716076 | -2.109816912 | 8.38905659   | 6.358353593 | Clec14a                 | C-type lectin domai binding /// sugar bir                     | full-length                             |             |
| 10400589 | 1.161950156  | -0.53727765  | -0.193614134 | -6.084822032 | 0.812132146  | -3.428831083 | 3.987229999 | C79407                  | expressed sequenc ---                                         | full-length                             |             |
| 10400844 | -0.323514574 | -4.337820223 | -0.046856844 | -6.316685667 | -1.088399635 | 5.522330055  | 11.1221662  | Pygl                    | liver glycogen phos nucleotide binding /                      | full-length                             |             |
| 10401160 | 1.225138039  | 1.313716903  | -0.160927964 | -6.104791485 | 1.228739332  | 0.963635091  | 6.56918436  | 6330442E10Rik           | RIKEN cDNA 6330 membrane /// integri                          | full-length                             |             |
| 10401829 | 0.595803589  | -4.749467229 | -0.025635437 | -6.386243133 | 1.097266459  | -1.314144536 | 8.497319048 | Eif1a /// EG266459      | eukaryotic translati RNA binding /// trar                     | full-length                             |             |
| 10402268 | 1.493248649  | 12.7635069   | 0.010006908  | -6.385967906 | 1.512831697  | 12.51011842  | 10.81436756 | Lgmn                    | legumain cysteine-type endoj                                  | full-length                             |             |
| 10402347 | 1.24179531   | 9.379263728  | 0.592324645  | 1.736052766  | 1.157023561  | 8.110260294  | 6.430070166 | Ifi27                   | interferon, alpha-inr aging /// response t                    | full-length                             |             |
| 10402428 | -0.839393488 | -0.577386966 | 0.000339599  | -6.391789134 | -1.723276604 | 6.368210274  | 7.875891223 | Serpina12               | serine (or cysteine) endopeptidase inhil                      | full-length                             |             |
| 10402585 | 0.921100346  | 5.661194202  | -0.044298367 | -6.302820047 | 1.339516934  | 9.599457844  | 8.611743433 | Wars                    | tryptophanyl-tRNA : nucleotide binding /                      | full-length                             |             |
| 10402708 | 1.18918105   | 0.969065702  | 0.029781478  | -6.381872439 | 0.655028302  | -3.831718517 | 7.671534298 | Ckb                     | creatine kinase, brz nucleotide binding /                     | full-length                             |             |
| 10402864 | 2.412037407  | 8.105508827  | 0.014681937  | -6.389599134 | 2.523119293  | 8.202195067  | 6.248789458 | Igh /// Igh-6 /// Igh-V | immunoglobulin he: activation of MAPK                         | full-length                             |             |
| 10402991 | 2.399502366  | 3.94282047   | -0.331881645 | -5.870341475 | 2.157094225  | 2.41403181   | 6.467209059 | ---                     | ---                                                           | partial                                 |             |
| 10403006 | 1.620561415  | -1.344328757 | 0.135290938  | -6.327309011 | 0.777842614  | -5.545859126 | 3.798757982 | ---                     | ---                                                           | partial                                 |             |
| 10403009 | 2.389924278  | -0.977717719 | -0.691308212 | -5.591200369 | 2.05812809   | -2.423139364 | 5.082742289 | ---                     | ---                                                           | full-length                             |             |
| 10403011 | 2.111400194  | 2.704021211  | 0.118904277  | -6.320955827 | 1.778406131  | 0.628485928  | 3.842409925 | ---                     | ---                                                           | partial                                 |             |
| 10403015 | 4.337803737  | 9.685338007  | -0.545166827 | -5.273574212 | 4.120459401  | 8.643590934  | 6.744391441 | ---                     | ---                                                           | partial                                 |             |
| 10403018 | 4.21655688   | 8.942663514  | -0.873432448 | -3.98083219  | 3.951374756  | 7.743953801  | 7.37883165  | ---                     | ---                                                           | partial                                 |             |
| 10403021 | 4.287390512  | 7.729487478  | -0.046014356 | -6.385402761 | 3.997255288  | 6.48350264   | 5.800215116 | ---                     | ---                                                           | partial                                 |             |
| 10403028 | 3.752118089  | 10.65221645  | -0.075561169 | -6.355007032 | 3.266736604  | 8.574404045  | 4.964840004 | ---                     | ---                                                           | partial                                 |             |
| 10403031 | 1.92222016   | -0.917950971 | 0.035480886  | -6.388269904 | 1.989601566  | -0.968703829 | 4.68986167  | ---                     | ---                                                           | partial                                 |             |
| 10403034 | 5.189469753  | 13.669253    | -0.195840125 | -6.179949344 | 5.241060299  | 13.38871935  | 7.401476571 | Igh                     | immunoglobulin he: ---                                        | full-length                             |             |
| 10403036 | 1.638535218  | -0.450231253 | -0.145283652 | -6.301570293 | 1.428014942  | -1.881517886 | 3.831466274 | Igh                     | immunoglobulin he: ---                                        | full-length                             |             |
| 10403038 | 3.048582165  | 12.45499113  | 0.123845885  | -6.191691887 | 2.520318938  | 9.76137894   | 4.406416528 | ---                     | ---                                                           | partial                                 |             |
| 10403043 | 3.894345847  | 11.19214841  | -0.024815067 | -6.387748467 | 3.908256773  | 10.81170244  | 7.674871583 | ---                     | ---                                                           | partial                                 |             |
| 10403046 | 0.566215986  | -5.515228577 | 0.011803673  | -6.390935091 | 1.168699793  | -2.048114191 | 3.878503935 | ---                     | ---                                                           | partial                                 |             |
| 10403048 | 4.330384989  | 13.11068604  | -0.272816451 | -5.867690611 | 4.278419591  | 12.56065952  | 7.978757401 | ---                     | ---                                                           | partial                                 |             |
| 10403054 | 3.276720893  | 10.2179919   | -0.033339043 | -6.383043153 | 3.208850097  | 9.539312284  | 7.262290059 | ---                     | ---                                                           | partial                                 |             |
| 10403060 | 3.474690349  | 12.27257273  | -0.044089698 | -6.372591976 | 3.290268835  | 11.20381827  | 6.407605945 | ---                     | ---                                                           | partial                                 |             |
| 10403063 | 4.290722601  | 11.40701745  | -0.062370461 | -6.370010917 | 4.405231237  | 11.30132205  | 6.63507977  | Igh                     | immunoglobulin he: ---                                        | full-length                             |             |
| 10403069 | 4.49697847   | 12.13711639  | -0.217895463 | -6.123392072 | 4.354255691  | 11.33444869  | 5.151612048 | ---                     | ---                                                           | partial                                 |             |
| 10403073 | 2.553319795  | 1.452620719  | 0.394920598  | -5.986090858 | 2.532027782  | 0.992309655  | 3.791517751 | ---                     | ---                                                           | partial                                 |             |
| 10403079 | 3.862783219  | 9.268242166  | -0.237930472 | -6.124018497 | 3.559129045  | 7.8684451    | 6.34304094  | ---                     | ---                                                           | partial                                 |             |
| 10403108 | 1.178575616  | 5.298144584  | 0.116595453  | -6.045838055 | 0.925758752  | 2.292751768  | 9.558395208 | Hmgn2                   | high mobility group chromatin /// DNA t                       | full-length                             |             |
| 10403352 | 1.26068969   | 3.913274215  | -0.134064248 | -6.080144249 | 1.790123181  | 7.446241723  | 7.597721323 | Klf6                    | Kruppel-like factor ( nucleic acid bindi                      | full-length                             |             |
| 10403743 | -1.350960195 | 4.66877051   | -0.69941719  | -0.919781683 | -1.901696051 | 8.157441671  | 6.548072685 | Inhba                   | inhibin beta-A receptor binding ///                           | full-length                             |             |
| 10403842 | 1.463572157  | 9.408897112  | -0.095184702 | -6.086984176 | 1.520993538  | 9.435594404  | 5.951190619 | Elmo1                   | engulfment and cel protein binding /// c                      | full-length                             |             |
| 10403871 | 1.692428397  | 8.281319133  | 0.117035347  | -6.106640473 | 1.713700433  | 7.995078383  | 6.294626442 | Aoah                    | acyloxyacyl hydroly metabolic proc                            | full-length                             |             |
| 10403938 | 1.011035303  | 3.641839976  | 0.039051838  | -6.351866637 | 0.792729324  | 0.792897986  | 10.80120072 | Cluster III             | Hist1h2ai /// Hist1h: histone cluster 1, H nucleosome /// DN/ | full-length                             |             |
| 10403941 | 2.656640354  | 11.07813234  | 0.233534434  | -5.677809695 | 2.344801224  | 9.161492735  | 10.27607897 | Cluster VI              | Hist1h3i /// Hist2h3: histone cluster 1, H nucleosome /// DN/ | full-length                             |             |
| 10403943 | 1.120615391  | 1.549044076  | 0.203522352  | -5.828277997 | 0.828974157  | -1.472093356 | 7.723914203 | Cluster III             | Hist1h2bm                                                     | histone cluster 1, H nucleosome /// DN/ | full-length |



| 10403948           | 1.004053745  | 0.761116453  | -0.088212161 | -6.275957082 | 0.611647463   | -3.381911426 | 9.427372087 |             |                                                               | LOC665622 /// Hist H2b histone family nucleosome /// DN/      | full-length        |                |
|--------------------|--------------|--------------|--------------|--------------|---------------|--------------|-------------|-------------|---------------------------------------------------------------|---------------------------------------------------------------|--------------------|----------------|
| 10403955           | 1.037873776  | 3.422236924  | 0.025148054  | -6.376685124 | 0.797657686   | 0.415266552  | 11.02750983 | Cluster III |                                                               | RP23-480B19.10 // similar to histone 2: nucleosome /// DN/    | full-length        |                |
| 10403957           | 1.083932352  | 2.622156242  | 0.037934599  | -6.364773774 | 0.806643561   | -0.548756545 | 9.955015714 | Cluster III |                                                               | Hist1h4i /// Hist1h4i:histone cluster 1, H nucleosome /// DN/ | full-length        |                |
| 10403978           | 1.057983377  | 1.071912872  | -0.05369897  | -6.350260663 | 0.67753786    | -2.862977282 | 9.612201009 |             |                                                               | LOC665622 /// Hist H2b histone family nucleosome /// DN/      | full-length        |                |
| 10404026           | 1.004131759  | 3.186191256  | 0.015980321  | -6.3855548   | 0.778642822   | 0.292649033  | 11.05200557 | Cluster III |                                                               | Hist1h2ai /// Hist1h:histone cluster 1, H nucleosome /// DN/  | full-length        |                |
| Affymetrix ID      | BS/Non Inf.  |              | LS/Non Inf.  |              | ReIN/Non Inf. |              | Average     | Cluster     | Gene                                                          | Gene                                                          | Gene Ontology (GC) | Transcript     |
| Transcript Cluster | logFC        | B            | logFC        | B            | logFC         | B            | expression  | Number      | Symbol                                                        | Title                                                         | Description        | Classification |
| 10404028           | 2.603618434  | 10.85407752  | 0.248023803  | -5.589892243 | 2.304269785   | 8.970109424  | 10.36666004 | Cluster VI  | Hist1h3i /// Hist1h3i:histone cluster 1, H nucleosome /// DN/ |                                                               |                    | full-length    |
| 10404045           | 1.042313045  | 3.499200285  | 0.015822981  | -6.385770926 | 0.79826785    | 0.449626287  | 10.84549605 | Cluster III |                                                               | Hist1h2ai /// Hist1h:histone cluster 1, H nucleosome /// DN/  | full-length        |                |
| 10404049           | 2.749791353  | 10.85610984  | 0.264904828  | -5.572538312 | 2.420768202   | 8.909123131  | 10.35790962 | Cluster VI  |                                                               | Hist1h3i /// Hist2h3i:histone cluster 1, H nucleosome /// DN/ | full-length        |                |
| 10404061           | 1.060988666  | -0.478686811 | 0.269557393  | -5.690363293 | 0.943211155   | -1.757122982 | 5.224189199 | Cluster III |                                                               | Hist1h2bb histone cluster 1, H nucleosome /// DN/             | full-length        |                |
| 10404063           | 2.178380614  | 3.680430705  | 0.057091388  | -6.37324649  | 1.390160901   | -0.992441981 | 4.158456098 |             |                                                               | Hist1h2ab histone cluster 1, H nucleosome /// DN/             | full-length        |                |
| 10404065           | 2.726411915  | 11.08407653  | 0.250747507  | -5.613465591 | 2.416737208   | 9.218562981  | 10.49620367 | Cluster VI  |                                                               | Hist1h3i /// Hist2h3i:histone cluster 1, H nucleosome /// DN/ | full-length        |                |
| 10404067           | 1.033673356  | 3.385528424  | 0.031752827  | -6.367696583 | 0.784845383   | 0.272698487  | 10.22968492 | Cluster III |                                                               | Hist1h4m /// Hist1h:histone cluster 1, H nucleosome /// DN/   | full-length        |                |
| 10404069           | 1.626035492  | 3.747389607  | -0.104516501 | -6.279660429 | 1.1859411     | 0.215485721  | 7.752394477 |             |                                                               | Hist1h1a histone cluster 1, H nucleosome /// DN/              | full-length        |                |
| 10404097           | -0.900095184 | 2.929042522  | 0.005478626  | -6.390922106 | -1.101639355  | 4.690669101  | 9.493295348 |             |                                                               | Slc17a3 solute carrier family ---                             | full-length        |                |
| 10404132           | -0.897137612 | -4.390626389 | 0.000504039  | -6.391789858 | -1.653929598  | -0.644467084 | 9.930473069 | Cluster X   |                                                               | Cmah cytidine monophosph iron ion binding /// c               | full-length        |                |
| 10404152           | 1.570728718  | 6.644797174  | -0.062726013 | -6.318808392 | 1.744170892   | 7.427818227  | 5.893428157 |             |                                                               | Fam65b family with sequenc binding                            | full-length        |                |
| 10404389           | 1.165804227  | 4.369368097  | -0.258682058 | -5.033796989 | 1.429154956   | 6.229401636  | 4.70963077  | Cluster IV  |                                                               | Irf4 interferon regulator DNA binding /// trar                | full-length        |                |
| 10404422           | 0.818703961  | 1.349662037  | 0.111271679  | -6.082772061 | 1.222765064   | 5.160686433  | 7.079824406 |             |                                                               | Serpnb6b serine (or cysteine) ---                             | full-length        |                |
| 10404429           | 1.143220679  | 3.127847614  | 0.145216577  | -6.010205264 | 1.517787696   | 5.818186752  | 6.642140254 |             |                                                               | Serpnb9 serine (or cysteine) protein binding /// a            | full-length        |                |
| 10404439           | 0.937929806  | 0.19623511   | 0.113369739  | -6.199085796 | 1.212375807   | 2.284911638  | 4.997937458 |             |                                                               | Serpnb9b serine (or cysteine) protein binding /// c           | full-length        |                |
| 10404496           | -0.353015577 | -5.823868425 | -0.08940307  | -6.290799673 | -1.01561348   | -0.244164602 | 10.21135598 | Cluster X   |                                                               | Nqo2 NAD(P)H dehydrog dihydronicotinamid                      | full-length        |                |
| 10404606           | 1.774521878  | 7.451937686  | 0.345994823  | -4.641714074 | 1.555228036   | 5.505739165  | 9.058640403 | Cluster I   |                                                               | Ly86 lymphocyte antigen protein binding /// e                 | full-length        |                |
| 10404874           | -0.778647753 | 4.735822104  | -0.150221369 | -5.273121148 | -1.013959411  | 7.31448221   | 7.084982906 |             |                                                               | Mylip myosin regulatory li molecular_function                 | full-length        |                |
| 10405216           | 1.677566478  | 8.248008208  | 0.053573833  | -6.330259197 | 1.57094802    | 7.046848368  | 6.416556822 | Cluster I   |                                                               | Syk spleen tyrosine kin; nucleotide binding /                 | full-length        |                |
| 10405587           | 1.038529572  | 6.280423137  | 0.01178464   | -6.386231903 | 1.219639924   | 7.711946634  | 9.217578351 |             |                                                               | Tgfb1 transforming growth protein binding /// e               | full-length        |                |
| 10405753           | -0.77841468  | -2.779502736 | -0.030464808 | -6.38222512  | -1.40252469   | 1.793414342  | 11.10209971 | Cluster X   |                                                               | Me1 malic enzyme 1, N/ catalytic activity /// r               | full-length        |                |
| 10406407           | -0.132794714 | -7.17789115  | -0.046992785 | -6.379220837 | -1.401069646  | -0.928053055 | 10.06352336 |             |                                                               | Arrdc3 arrestin domain cor molecular_function                 | full-length        |                |
| 10406417           | 1.605874795  | 13.36525042  | 0.007367722  | -6.388768671 | 1.777866237   | 14.17400532  | 11.60114828 |             |                                                               | Actg1 actin, gamma, cyto nucleotide binding /                 | full-length        |                |
| 10406676           | -1.141512845 | 3.74917922   | -0.428593424 | -3.370723353 | -1.448358048  | 5.968348952  | 6.521617429 |             |                                                               | Lhfp12 lipoma HMGIC fusi; membrane /// integri                | full-length        |                |
| 10406817           | 0.530953684  | -3.325505291 | 0.086399273  | -6.254219671 | 1.044105157   | 1.797532176  | 7.554511623 |             |                                                               | Enc1 ectodermal-neural (actin binding) /// pro                | full-length        |                |
| 10406928           | 2.56849209   | 17.16581422  | 0.110748034  | -5.894686271 | 2.826397166   | 17.91298073  | 7.022083842 | Cluster VI  |                                                               | Cd180 CD180 antigen receptor activity /// i                   | full-length        |                |
| 10406982           | 0.643151629  | -3.557585931 | 0.851854434  | -0.996312857 | 1.323500189   | 1.85478772   | 5.314655354 |             |                                                               | Adamts6 a disintegrin-like an molecular_function              | full-length        |                |
| 10407327           | 2.4935708    | 4.607925365  | -0.330479742 | -5.851719965 | 2.86552595    | 5.739516162  | 5.758154418 |             |                                                               | Emb embigin membrane /// integri                              | full-length        |                |
| 10407481           | 1.775358402  | 11.34963967  | -0.110298871 | -6.008675967 | 2.194438508   | 13.46550743  | 7.321659514 |             |                                                               | Pfkb phosphofructokinase nucleotide binding /                 | full-length        |                |
| 10407792           | 1.517900535  | 4.38555468   | -0.212925213 | -5.812571708 | 1.830979119   | 6.061363868  | 6.519176974 |             |                                                               | Gpr137b-ps /// Gpr: G protein-coupled r molecular_function    | full-length        |                |
| 10407803           | 1.159358544  | 1.522383585  | 0.258624353  | -5.563763527 | 1.288877063   | 2.187174401  | 6.007661361 |             |                                                               | Gpr137b G protein-coupled r molecular_function                | full-length        |                |
| 10407985           | 2.412308373  | 4.233311296  | 0.153448223  | -6.271724004 | 3.103360856   | 6.641294408  | 4.742868145 |             |                                                               | Gpr141 G protein-coupled r signal transducer a                | full-length        |                |
| 10408072           | 1.010068222  | 3.503430192  | 0.03156476   | -6.366298409 | 0.787498501   | 0.618477156  | 11.07846573 | Cluster III |                                                               | Hist1h2ai /// Hist1h:histone cluster 1, H nucleosome /// DN/  | full-length        |                |
| 10408074           | 1.030828203  | 3.296861972  | 0.050982006  | -6.330548389 | 0.796721123   | 0.358431987  | 10.20357844 | Cluster III |                                                               | Hist1h4m /// Hist1h:histone cluster 1, H nucleosome /// DN/   | full-length        |                |
| 10408077           | 1.28868286   | 2.58698012   | -0.02905779  | -6.380638533 | 0.987583699   | -0.325216131 | 6.156464837 | Cluster III |                                                               | Hist1h2ak histone cluster 1, H nucleosome /// DN/             | full-length        |                |
| 10408081           | 2.812923756  | 10.96193489  | 0.184656867  | -5.99155171  | 2.552592512   | 9.375854526  | 8.758656865 | Cluster VI  |                                                               | Hist1h1b histone cluster 1, H nucleosome /// DN/              | full-length        |                |
| 10408083           | 2.649884886  | 10.95584562  | 0.243234839  | -5.631898033 | 2.332684904   | 9.007990185  | 10.26776855 | Cluster VI  |                                                               | Hist1h3i /// Hist2h3i:histone cluster 1, H nucleosome /// DN/ | full-length        |                |
| 10408085           | 1.018184824  | 3.369328625  | 0.020011024  | -6.381947355 | 0.797077252   | 5.539189499  | 10.80013262 | Cluster III |                                                               | Hist1h2ai /// Hist1h:histone cluster 1, H nucleosome /// DN/  | full-length        |                |
| 10408092           | 1.083932352  | 2.622156242  | 0.037934599  | -6.364773774 | 0.806643561   | -0.548756545 | 9.955015714 | Cluster III |                                                               | Hist1h4i /// Hist1h4i:histone cluster 1, H nucleosome /// DN/ | full-length        |                |
| 10408094           | 1.022867933  | 3.591068061  | 0.03605511   | -6.358838125 | 0.793267193   | 0.645735645  | 10.8471452  | Cluster III |                                                               | RP23-480B19.10 // similar to histone 2: nucleosome /// DN/    | full-length        |                |
| 10408111           | 1.012918984  | 3.362643784  | 0.021968165  | -6.379821143 | 0.78275691    | 0.413990572  | 11.02689464 | Cluster III |                                                               | Hist1h2ai /// Hist1h:histone cluster 1, H nucleosome /// DN/  | full-length        |                |
| 10408118           | 1.045914804  | 3.491040544  | 0.033613183  | -6.36489555  | 0.813642892   | 0.587064081  | 10.79949939 | Cluster III |                                                               | Hist1h2ag /// Hist1f histone cluster 1, H nucleosome /// mol  | full-length        |                |
| 10408200           | 1.421810245  | 2.668680891  | 0.063709336  | -6.347161071 | 1.234249764   | 0.879564021  | 7.385365586 | Cluster III |                                                               | Hist1h4f histone cluster 1, H nucleosome /// DN/              | full-length        |                |
| 10408202           | 2.674371361  | 10.21067781  | 0.217988415  | -5.853739131 | 2.336739279   | 8.177992903  | 10.18473722 | Cluster VI  |                                                               | Hist1h3i /// Hist1h3i:histone cluster 1, H nucleosome /// DN/ | full-length        |                |
| 10408239           | 2.689368252  | 11.19583886  | 0.2518841    | -5.572018029 | 2.369072959   | 9.256003265  | 10.46535703 | Cluster VI  |                                                               | Hist1h3i /// Hist1h3i:histone cluster 1, H nucleosome /// DN/ | full-length        |                |
| 10408243           | 1.06134143   | 3.663048314  | 0.094210028  | -6.182863685 | 0.839327786   | 0.892430554  | 9.94395126  | Cluster III |                                                               | Hist1h4m /// Hist1h:histone cluster 1, H nucleosome /// DN/   | full-length        |                |
| 10408246           | 2.608984263  | 10.81349922  | 0.240695322  | -5.641715772 | 2.297328517   | 8.86930596   | 10.36360744 | Cluster VI  |                                                               | Hist1h3a /// Hist1h:histone cluster 1, H nucleosome /// DN/   | full-length        |                |
| 10408251           | -0.2257751   | -6.707382349 | 0.2214465    | -5.853433258 | -1.183883458  | 0.66171065   | 9.185585321 |             |                                                               | Slc17a4 solute carrier family transporter activity ,          | full-length        |                |
| 10408600           | 1.014257298  | 1.833239822  | -0.129014317 | -6.092824855 | 0.679061019   | -2.010586481 | 8.283333601 |             |                                                               | Serpnb6a serine (or cysteine) endopeptidase inhil             | full-length        |                |

| Affymetrix ID      | BS/Non Inf.  | LS/Non Inf.  | ReIN/Non Inf. | Average      | Cluster      | Gene         | Gene        | Gene Ontology (GC     | Transcript            |                           |                |
|--------------------|--------------|--------------|---------------|--------------|--------------|--------------|-------------|-----------------------|-----------------------|---------------------------|----------------|
| Transcript Cluster | logFC        | B            | logFC         | B            | logFC        | expression   | Number      | Symbol                | Title                 | Description               | Classification |
| 10408693           | 1.673038375  | -3.326360576 | -0.367135822  | -6.143816796 | 2.777961747  | 0.187511219  | 5.712335758 | F13a1                 | coagulation factor 3  | protein-glutamine g       | full-length    |
| 10408838           | -0.524174474 | -4.823580402 | -0.08751202   | -6.131645142 | -1.679538688 | 3.772874628  | 11.37920873 | Elovl2                | elongation of very l  | very-long-chain fatt      | full-length    |
| 10408850           | 1.068925592  | 6.055389156  | -0.148033571  | -5.640923679 | 1.062705125  | 5.560992577  | 7.079941882 | Nedd9                 | neural precursor ce   | regulation of cell gr     | full-length    |
| 10408861           | -0.724048852 | 0.223769085  | -0.042286803  | -6.346006033 | -1.027027005 | 3.282750419  | 9.509372748 | 9530008L14Rik         | RIKEN cDNA 9530       | membrane /// integri      | full-length    |
| 10409240           | 1.846269208  | 10.08405799  | 0.020260726   | -6.381842135 | 2.038492694  | 10.84060835  | 6.461892809 | Sema4d                | sema domain, imm      | receptor binding ///      | full-length    |
| 10409376           | 1.897247082  | 8.304814493  | 0.108437502   | -6.194868798 | 2.158847792  | 9.402381432  | 6.988596414 | Hk3                   | hexokinase 3          | nucleotide binding /      | full-length    |
| 10409567           | 1.862487502  | 6.317365676  | 0.178774213   | -6.003206374 | 2.088668809  | 7.209941214  | 6.060815846 | Tifab                 | TRAF-interacting p    | ---                       | full-length    |
| 10409866           | 1.208470232  | 5.332220193  | 0.199139508   | -5.469044371 | 0.621620548  | -1.513341107 | 5.914253402 | Ctla2b                | cytotoxic T lympho    | cysteine protease ir      | partial        |
| 10409876           | 1.782509988  | 6.502418331  | 0.153153368   | -6.068572673 | 1.853597947  | 6.521443825  | 6.039876641 | Ctla2a                | cytotoxic T lympho    | molecular_function        | full-length    |
| 10410452           | -1.363159492 | -3.494152106 | -0.000896818  | -6.391788824 | -1.761729846 | -2.095708147 | 9.460559388 | Srd5a1                | steroid 5 alpha-red   | 3-oxo-5-alpha-sterc       | full-length    |
| 10410560           | 1.081985533  | 2.452804367  | -0.012822341  | -6.388788134 | 0.807327052  | -0.666580287 | 5.630000489 | Trip13                | thyroid hormone re    | nucleotide binding /      | full-length    |
| 10410650           | -0.926630249 | 2.300887814  | -0.419003046  | -3.136384648 | -1.092401193 | 3.615806155  | 7.123835428 | Zfp825                | zinc finger protein   | ε nucleus /// zinc ion    | full-length    |
| 10410927           | -0.488662795 | -6.097090524 | -0.825587163  | -3.532697959 | -1.076411999 | -3.117384936 | 6.217143022 | LOC280487             | pol polyprotein       | ---                       | partial        |
| 10410931           | 1.729542495  | -0.511448571 | 0.13312081    | -6.324653275 | 2.028486224  | 0.551234424  | 5.144738856 | Vcan                  | versican              | binding /// calcium i     | full-length    |
| 10411359           | 1.792012955  | 6.978017219  | -0.07141986   | -6.314801607 | 1.729926972  | 6.140992556  | 6.998276701 | Plp2                  | proteolipid protein   | 2 membrane /// integri    | full-length    |
| 10411595           | 0.995286333  | 4.561796084  | 0.170330472   | -5.521789554 | 1.023057653  | 4.444672927  | 6.222896902 | Naip2                 | NLR family, apopto    | nucleotide binding /      | full-length    |
| 10411633           | 1.216206039  | 3.137363684  | 0.223687191   | -5.614918129 | 0.798239658  | -1.180420403 | 4.881047026 | Naip1                 | NLR family, apopto    | nucleotide binding /      | full-length    |
| 10411668           | -0.666225565 | -2.620722632 | -0.216683234  | -5.733106596 | -1.269379597 | 2.602566946  | 7.487831736 | Ocln                  | occludin              | structural molecule       | full-length    |
| 10411728           | 1.451033253  | 1.804600321  | 0.119610032   | -6.265273963 | 0.9970172    | -1.839213113 | 4.183971695 | Ccnph                 | centromere protein    | kinetochore /// kinet     | full-length    |
| 10411739           | 2.488172416  | 6.804383     | -0.196357992  | -6.103639215 | 2.251759816  | 5.237689133  | 6.07059277  | Ccnb1                 | cyclin B1             | in utero embryonic        | full-length    |
| 10412036           | -0.45115032  | -3.217020777 | -0.178401881  | -5.59231414  | -1.052625319 | 3.759644386  | 7.912664386 | Apoo /// Apoo-ps      | apolipoprotein O      | /// membrane /// integri  | full-length    |
| 10412123           | 1.543574131  | 9.569308021  | 0.02091855    | -6.377881983 | 1.504395589  | 8.832488827  | 6.384197149 | Ncf2                  | neutrophil cytosolic  | acrosome /// bindin       | full-length    |
| 10412211           | 3.430390235  | 13.31908536  | 0.140570235   | -6.15684091  | 3.700117919  | 13.81842533  | 6.319758208 | Gzma                  | granzyme A            | serine-type endope        | full-length    |
| 10412218           | 1.181816292  | 8.48809159   | 0.008615211   | -6.388436167 | 1.121690893  | 7.441785754  | 5.296097447 | Gzmk                  | granzyme K            | serine-type endope        | full-length    |
| 10412345           | 1.465779112  | 9.024957918  | -0.249636416  | -4.645848949 | 1.655868631  | 10.04537423  | 6.361684057 | Parp8                 | poly (ADP-ribose) ɛ   | NAD+ ADP-ribosylt         | full-length    |
| 10412607           | -1.390891779 | 5.89759731   | -0.186542311  | -5.703454918 | -1.901624217 | 9.11239537   | 8.903904949 | Abhd6                 | abhydrolase domai     | catalytic activity /// r  | full-length    |
| 10413047           | 2.023844067  | 7.40783395   | -0.105536554  | -6.250558974 | 1.876070715  | 6.100702814  | 6.515110578 | Plau                  | plasminogen activa    | response to hypoxi        | full-length    |
| 10414163           | -0.650084089 | -1.517696827 | -0.041309231  | -6.355975999 | -1.022002646 | -2.19609727  | 7.170806772 | Lrit1                 | leucine-rich repeat,  | protein binding /// e     | full-length    |
| 10414262           | 2.263078432  | 10.0681886   | -0.162422298  | -5.980443354 | 2.249403484  | 9.566477115  | 6.70650711  | Ear2                  | eosinophil-associa    | nucleic acid binding      | full-length    |
| 10414360           | 2.866730502  | 14.22814816  | 0.205413917   | -5.589846347 | 3.111773911  | 14.80785711  | 8.184513738 | Lgals3                | lectin, galactose b   | ir skeletal developme     | full-length    |
| 10414548           | 1.7722049    | 7.615476489  | -0.110031642  | -6.185366188 | 1.597444896  | 5.984295756  | 6.257220313 | Rnase6                | ribonuclease, RNas    | nucleic acid binding      | full-length    |
| 10415052           | 1.035300964  | 3.884063216  | 0.053241695   | -6.317947871 | 1.439530205  | 7.169420941  | 8.987358541 | Mmp14                 | matrix metalloprote   | metalloendopeptid         | full-length    |
| 10415279           | -1.417876186 | 4.879359713  | -0.151605523  | -6.01772778  | -1.947796403 | 8.094265501  | 9.114115085 | 1110028A07Rik         | RIKEN cDNA 1110       | endoplasmic reticul       | full-length    |
| 10416023           | 0.79672943   | -5.581003887 | 0.381567119   | -5.972973563 | 1.911733017  | -1.04828725  | 6.708502695 | Scara5                | scavenger receptor    | scavenger receptor        | full-length    |
| 10416037           | 1.172340705  | -2.285815974 | -0.130575577  | -6.302769279 | 0.157812195  | -7.210773537 | 4.67100739  | Pbk                   | PDZ binding kinase    | nucleotide binding /      | full-length    |
| 10416071           | -0.862731701 | 0.370234525  | -0.249172111  | -5.32468896  | -1.072324622 | 2.082431628  | 5.70183682  | Chrna2                | cholinergic recepto   | receptor activity /// r   | full-length    |
| 10416334           | 0.874771103  | 1.612933129  | 0.109396373   | -6.114949803 | 1.065961839  | 3.234381088  | 6.69580545  | Dok2                  | docking protein 2     | MAPKKK cascade ,          | full-length    |
| 10416340           | 1.081198624  | -1.600153237 | 0.019538754   | -6.388948473 | 0.505563684  | -5.723286941 | 5.335315329 | Gfra2                 | glial cell line deriv | e receptor activity /// r | full-length    |
| 10416437           | 0.794454397  | 6.789689158  | -0.127875889  | -5.272202635 | 1.102540119  | 10.22162057  | 10.33094596 | Lcp1                  | lymphocyte cytosol    | ruffle /// phagocytic     | full-length    |
| 10416566           | 1.322241611  | 9.197014321  | 0.28737806    | -3.688190184 | 1.163299783  | 7.256789524  | 5.869620573 | Epsti1                | epithelial stromal    | in molecular_function     | full-length    |
| 10416696           | -0.488662795 | -6.097090524 | -0.825587163  | -3.532697959 | -1.076411999 | -3.117384936 | 6.217143022 | 100043821 /// 1000    | predicted gene, 10(   | ---                       | est            |
| 10416698           | -0.488662795 | -6.097090524 | -0.825587163  | -3.532697959 | -1.076411999 | -3.117384936 | 6.217143022 | 100043821 /// 1000    | predicted gene, 10(   | ---                       | est            |
| 10416700           | 1.153499881  | -0.967828384 | 0.036114042   | -6.381788513 | 0.454941109  | -5.964796962 | 5.994365929 | Pcdh17                | protocadherin 17      | calcium ion binding       | full-length    |
| 10416837           | 3.07736229   | 4.602021016  | -0.156371507  | -6.309598454 | 3.595138698  | 5.920929812  | 6.674863917 | Irg1                  | immunoresponsive      | propionate cataboli       | full-length    |
| 10417787           | 1.03790217   | 4.597224852  | 0.033164717   | -6.35919191  | 0.963873257  | 3.380243395  | 6.872385087 | Gng2                  | guanine nucleotide    | GTPase activity /// r     | full-length    |
| 10418410           | 1.140518857  | 5.790194814  | 0.039110906   | -6.345359269 | 1.282549077  | 6.704151981  | 8.092748887 | Prkcd                 | protein kinase C, d   | nucleotide binding /      | full-length    |
| 10418434           | 0.751164488  | 0.185850163  | 0.1290006     | -6.009389634 | 1.098754735  | 3.565523283  | 12.51440271 | Ith3                  | inter-alpha trypsin   | i endopeptidase inhi      | full-length    |
| 10418848           | 1.328702946  | 3.511998235  | 0.123193638   | -6.170419061 | 1.081487982  | 1.031975639  | 6.231075677 | Wdfy4                 | WD repeat and FY      | ---                       | partial        |
| 10418868           | 1.422117113  | 2.724279327  | 0.109568469   | -6.259320022 | 1.004862074  | -0.901366629 | 6.763233079 | ---                   | ---                   | ---                       | predicted      |
| 10418917           | -0.755013901 | -0.988783226 | -0.140704078  | -6.048236209 | -1.107546431 | 2.168480798  | 8.049869819 | 2200001115Rik         | RIKEN cDNA 2200       | ---                       | full-length    |
| 10419082           | -0.6305862   | 1.790460819  | -0.025557435  | -6.361065288 | -1.089073786 | 7.342468881  | 10.41096244 | 5730469M10Rik         | RIKEN cDNA 5730       | extracellular region      | full-length    |
| 10419154           | 1.824621031  | 9.835061402  | -0.003448791  | -6.391507718 | 1.624689193  | 8.02836958   | 5.73450307  | Ear2 /// Ear1 /// Ear | eosinophil-associa    | nucleic acid binding      | full-length    |
| 10419156           | 2.046706297  | 6.699734101  | -0.002442783  | -6.391724781 | 1.813061987  | 4.896932944  | 6.271160705 | Ear2 /// Ear1 /// Ear | eosinophil-associa    | nucleic acid binding      | full-length    |
| 10419296           | 1.160290348  | 2.779568821  | -0.000876063  | -6.391777978 | 1.012340426  | 1.029637081  | 5.684902209 | Wdhd1                 | WD repeat and HM      | DNA binding /// nuc       | full-length    |

| 10419323           | 1.570038014  | 4.452191649  | 0.107457158   | -6.247385138 | 1.396478739  | 2.787233013  | 5.686657303 | Dlgap5             | discs, large (Drosophila) nucleus /// cytoplasm      | full-length          |             |                |
|--------------------|--------------|--------------|---------------|--------------|--------------|--------------|-------------|--------------------|------------------------------------------------------|----------------------|-------------|----------------|
| 10419563           | -4.085458832 | 1.162971677  | -3.094252761  | -0.608404836 | -4.114620294 | 0.854708968  | 6.062411127 | Rnase1             | ribonuclease, RNase nucleic acid binding             | full-length          |             |                |
| 10419854           | 1.860609124  | 11.21372998  | 0.109706572   | -6.05332113  | 2.135477046  | 12.44323259  | 7.533482936 | Slc7a8             | solute carrier family amine transporter              | full-length          |             |                |
| 10420023           | -0.581250126 | -3.027489904 | 0.168097551   | -5.925138904 | -1.113826155 | 2.0241902    | 8.178549003 | Fam158a            | family with sequence ---                             | full-length          |             |                |
| 10420198           | 2.085226247  | 11.00553043  | 0.220196085   | -5.396477187 | 1.870699525  | 9.283001959  | 6.89746141  | Ripk3              | receptor-interacting nucleotide binding /            | full-length          |             |                |
| 10420308           | 4.739648816  | 15.47432623  | 0.287669311   | -5.67388678  | 5.280516687  | 16.36105088  | 7.145009835 | Gzmb               | granzyme B serine-type endopeptidase                 | full-length          |             |                |
| 10420426           | 1.333050422  | -0.877488785 | -0.116986967  | -6.311886325 | 0.866736596  | -4.056564519 | 4.420003638 | F630043A04Rik      | RIKEN cDNA F630 ---                                  | full-length          |             |                |
| 10420483           | 1.947397729  | 3.932709116  | 0.885863718   | -2.234253083 | 2.322103987  | 5.456833953  | 5.23748241  | Phf11              | EG628700 PHD finger protein ---                      | full-length          |             |                |
| 10420488           | 0.952217941  | 0.999543106  | 0.757201147   | -0.368515922 | 1.522709011  | 5.518553136  | 6.957555637 | D14Ert668e         | DNA segment, Chr DNA binding /// nucleosome          | full-length          |             |                |
| 10420935           | -0.855791201 | 6.976219728  | -0.045933479  | -0.45867676  | -1.142308166 | 9.948892794  | 11.52961769 | Ephx2              | epoxide hydrolase ; magnesium ion binding            | full-length          |             |                |
| 10421029           | 1.292894468  | 2.541242522  | 0.229578766   | -5.739790672 | 0.724769138  | -2.76271783  | 5.279592811 | Cdca2              | cell division cycle a molecular function             | full-length          |             |                |
| 10421293           | 1.071854084  | 6.256505287  | -0.191568099  | -5.146468318 | 1.062085568  | 5.723218877  | 6.540193183 | Ppp3cc             | protein phosphatase phosphoprotein phosphatase       | full-length          |             |                |
| 10421309           | 0.227183247  | -6.912292179 | -0.031222194  | -6.384823978 | 1.024446085  | -2.446551362 | 10.22480952 | Slc39a14           | solute carrier family zinc ion transporter           | full-length          |             |                |
| 10421648           | -2.500849101 | 4.458013489  | -0.984584126  | -2.79072219  | -2.913221775 | 5.738994633  | 8.878193232 | Slc25a30           | solute carrier family transporter activity ,         | full-length          |             |                |
| 10421697           | 1.484596241  | 6.320152516  | 0.245565075   | -5.299841049 | 1.981364073  | 9.266597797  | 7.938886558 | 9030625A04Rik      | RIKEN cDNA 9030 ---                                  | full-length          |             |                |
| 10422247           | -0.488662795 | -6.097090524 | -0.825587163  | -3.532697959 | -1.076411999 | -3.117384936 | 6.217143022 | LOC280487          | pol polyprotein ---                                  | partial              |             |                |
| 10422493           | 1.086765034  | 3.9468177    | 0.196985869   | -5.520065782 | 1.073495126  | 3.4024823    | 5.979377752 | Gpr18              | G protein-coupled receptor signal transducer a       | full-length          |             |                |
| 10422608           | 1.359864788  | 0.278290709  | 0.083418859   | -6.340867954 | 1.200894381  | -1.134943011 | 6.618715783 | Oxct1              | 3-oxoacid CoA transferase mitochondrion ///          | full-length          |             |                |
| 10422635           | -1.626773115 | 2.936619132  | -0.074116017  | -6.343219375 | -1.908887909 | 4.2347417    | 9.704342597 | C6                 | complement component ---                             | full-length          |             |                |
| 10422748           | -1.011501279 | -0.785611259 | 0.011821303   | -6.390333294 | -1.153547347 | 0.000170563  | 11.49263507 | C9                 | complement component extracellular region            | full-length          |             |                |
| 10422760           | 2.121215255  | 7.029865932  | 0.255835346   | -5.713117689 | 2.025042928  | 6.064795188  | 7.013326301 | Fyb                | FYN binding protein nucleus /// cytoplasm            | full-length          |             |                |
| 10422822           | -1.206566678 | -2.683148725 | -0.20630745   | -6.206349742 | -2.006593534 | 1.152124436  | 10.37370014 | Lifr               | leukemia inhibitory receptor activity ///            | full-length          |             |                |
| 10423005           | -1.268627979 | 7.644371912  | -0.065733874  | -6.246618518 | -1.654735772 | 10.36084297  | 10.05926814 | Ugt3a1             | UDP glycosyltransferase metabolic process /          | full-length          |             |                |
| 10423090           | -0.584527936 | -0.364574257 | -0.046189538  | -6.318594351 | -1.14144221  | 6.0795235    | 10.06168223 | Amacr              | alpha-methylacyl-CoA catalytic activity ///          | full-length          |             |                |
| 10424188           | 1.099818259  | 0.81327286   | 0.215750749   | -5.827923196 | 0.849252223  | -1.733229611 | 5.293418537 | Mtbp               | Mdm2, transforming protein binding ///               | full-length          |             |                |
| Affymatrix ID      | BS/Non Inf.  | LS/Non Inf.  | ReIN/Non Inf. | Average      | Cluster      | Gene         | Gene        | Gene Ontology (GC) | Transcript                                           |                      |             |                |
| Transcript Cluster | logFC        | B            | logFC         | B            | logFC        | B            | expression  | Number             | Symbol                                               | Title                | Description | Classification |
| 10424377           | -0.488662795 | -6.097090524 | -0.825587163  | -3.532697959 | -1.076411999 | -3.117384936 | 6.217143022 | 1000               | 1000                                                 | predicted gene, 1000 | predicted   | predicted      |
| 10424400           | 1.610728559  | 10.97211977  | -0.214528029  | -4.881263666 | 1.531018796  | 9.939740787  | 7.262905063 | Myc                | myelocytomatosis c b cell apoptosis ///              | full-length          |             |                |
| 10424676           | 1.052586866  | 6.445673286  | 0.70662265    | 2.558853264  | 1.134407823  | 6.877828367  | 11.9742688  | Ly6e               | lymphocyte antigen in utero embryonic                | full-length          |             |                |
| 10424683           | 0.680433621  | -2.168893491 | 0.180955747   | -5.884155585 | 1.229363994  | 2.726397924  | 4.004173444 | ---                | ---                                                  | ---                  | partial     |                |
| 10424929           | -0.998410269 | 1.88880566   | -0.217485487  | -5.542763879 | -1.582949172 | 6.464582555  | 7.827781599 | Adck5              | aaarF domain containing protein kinase activ         | full-length          |             |                |
| 10425049           | 0.802535498  | 4.2800802    | 1.271031507   | 8.941546977  | 1.280955908  | 9.227511735  | 11.38494442 | Apol9a             | apolipoprotein L 9a ---                              | full-length          |             |                |
| 10425053           | 1.729952914  | 8.949268103  | -0.170188032  | -5.762671008 | 1.883960136  | 9.530800042  | 6.415382968 | Ncf4               | neutrophil cytosolic protein binding /// c           | full-length          |             |                |
| 10425066           | 1.906754174  | 6.726485865  | -0.222096142  | -5.787643546 | 2.025385409  | 6.993058303  | 7.134698146 | Csf2rb             | colony stimulating factor receptor activity ///      | full-length          |             |                |
| 10425092           | 2.280002693  | 9.931153201  | 0.314661185   | -5.015310279 | 2.095910028  | 8.500293091  | 7.435875071 | Cyth4              | cytohesin 4 guanyl-nucleotide e                      | full-length          |             |                |
| 10425161           | 1.586039166  | 6.770286803  | -0.025656783  | -6.379493761 | 1.262811319  | 3.793621814  | 9.472872593 | Lgals1             | lectin, galactose binding sugar binding ///          | full-length          |             |                |
| 10425321           | 2.359205695  | 12.27425151  | 0.577242047   | -1.600399795 | 2.625105992  | 13.13843722  | 7.136738212 | Apobec3            | apolipoprotein B mitochondrial nucleus /// cytoplasm | full-length          |             |                |
| 10425410           | 1.314826364  | 7.082891176  | 0.155745747   | -5.730231913 | 1.383186644  | 7.239569793  | 5.64960807  | Grap2              | GRB2-related adaptor protein binding                 | full-length          |             |                |
| 10425866           | 1.93690622   | 8.29320546   | 0.170449924   | -5.935240245 | 2.00834374   | 8.286921127  | 7.008517122 | Parvg              | parvin, gamma actin binding /// protein              | full-length          |             |                |
| 10426479           | 1.202293745  | 3.566087177  | -0.134437048  | -6.069095759 | 1.137840037  | 2.5816952    | 7.757515217 | Ano6               | anoctamin 6 ion channel activity                     | full-length          |             |                |
| 10426557           | -0.664617276 | 3.666589984  | -0.147451612  | -5.184896407 | -1.012275101 | 7.999808883  | 7.948039329 | Pfkm               | phosphofructokinase nucleotide binding /             | full-length          |             |                |
| 10426812           | -0.78627222  | 3.822985401  | -0.18258336   | -5.04568881  | -1.457251204 | 10.50940482  | 10.78864991 | Gpd1               | glycerol-3-phosphate catalytic activity ///          | full-length          |             |                |
| 10427035           | 1.548274755  | 4.369321786  | 0.077880269   | -6.314560799 | 1.614198121  | 4.407623523  | 6.596011679 | Nr4a1              | nuclear receptor subunit DNA binding ///             | full-length          |             |                |
| 10427336           | 2.297149129  | 15.3541954   | 0.006939591   | -6.389948784 | 2.219440645  | 14.57756846  | 7.860930127 | Nckap11            | NCK associated protein ---                           | full-length          |             |                |
| 10427389           | -0.488662795 | -6.097090524 | -0.825587163  | -3.532697959 | -1.076411999 | -3.117384936 | 6.217143022 | LOC280487          | pol polyprotein ---                                  | partial              |             |                |
| 10427918           | 1.647756833  | 4.706411184  | -0.034922552  | -6.377142404 | 1.491600492  | 3.214037644  | 6.441586478 | Fam105a            | family with sequence ---                             | full-length          |             |                |
| 10428302           | -0.664676758 | -3.510747169 | -0.447684593  | -4.47299739  | -1.40431655  | 2.200637139  | 7.722891507 | Klf10              | Kruppel-like factor nucleic acid binding             | full-length          |             |                |
| 10428534           | 1.230721493  | 2.022701269  | -0.099879238  | -6.263690921 | 1.492373113  | 3.622334505  | 4.545753771 | Trps1              | trichorhinophalange DNA binding ///                  | full-length          |             |                |
| 10428536           | 1.173417702  | 5.027733779  | 0.17016661    | -5.702411122 | 1.036177173  | 3.258060786  | 5.254332809 | Trps1              | trichorhinophalange DNA binding ///                  | full-length          |             |                |
| 10428604           | 1.024609234  | 8.174936914  | -0.048400533  | -6.259554433 | 0.666046338  | 2.920149523  | 7.10136318  | Tnfrsf1b           | tumor necrosis factor receptor activity ///          | full-length          |             |                |
| 10428763           | 1.186061874  | -3.273003811 | 0.116283731   | -6.340629484 | 0.911263413  | -4.841234148 | 6.009052725 | Atad2              | ATPase family, AAA nucleotide binding /              | full-length          |             |                |
| 10428983           | 1.547352456  | 11.61627575  | -0.0529457    | -6.267778264 | 1.723037128  | 12.48585871  | 8.19133647  | Fam49b             | family with sequence ---                             | full-length          |             |                |
| 10429114           | 0.843720289  | -2.300373089 | -0.059888565  | -6.355637103 | 1.14649618   | -0.193742168 | 5.915243503 | Tmem71             | transmembrane protein membrane ///                   | full-length          |             |                |
| 10429128           | 2.274439678  | 10.66625231  | 0.314793578   | -4.846605702 | 2.589163657  | 11.79410151  | 7.45697743  | Sla                | src-like adaptor protein binding ///                 | full-length          |             |                |
| 10429520           | 0.904149481  | -0.805158109 | -0.155648568  | -6.084393203 | 1.006937077  | -0.230461318 | 6.828532686 | Ly6d               | lymphocyte antigen plasma membrane                   | full-length          |             |                |

| 10429560           | 2.740088064  | 10.05264577   | 0.255904825   | -5.71161494   | 3.816276419  | 13.58972306  | 5.42516361  | Ly6i                    | lymphocyte antigen plasma membrane             | full-length                                |             |                |
|--------------------|--------------|---------------|---------------|---------------|--------------|--------------|-------------|-------------------------|------------------------------------------------|--------------------------------------------|-------------|----------------|
| 10429564           | 2.792793476  | 16.13039233   | 0.936583426   | 3.783099915   | 3.147798147  | 17.14835405  | 11.10187085 | Ly6a                    | lymphocyte antigen intracellular /// plas      | full-length                                |             |                |
| 10429568           | 3.903071062  | 18.98967398   | 0.380013251   | -3.477026386  | 4.237746196  | 19.59639302  | 9.071093523 | Ly6c1 /// Ly6c2         | lymphocyte antigen external side of pla:       | full-length                                |             |                |
| 10429573           | 3.476367095  | 17.78210874   | 0.60820174    | -0.585117848  | 3.847649503  | 18.5930618   | 8.008440878 | Ly6c1 /// Ly6c2         | lymphocyte antigen external side of pla:       | full-length                                |             |                |
| 10429580           | 2.215200895  | 1.475479852   | -0.362685906  | -5.936812267  | 2.916592948  | 3.912943175  | 5.453274242 | ---                     | ---                                            | partial                                    |             |                |
| 10429843           | 0.933719421  | 0.94340034    | 0.815581567   | 0.328018928   | 1.166511672  | 2.767214847  | 7.421057387 | Plec1                   | plectin 1 actin binding /// insc               | full-length                                |             |                |
| 10429968           | -1.049741368 | -3.626065877  | 0.216135939   | -6.194115942  | -1.525858686 | -1.378619994 | 10.01580257 | ---                     | ---                                            | ---                                        |             |                |
| 10430006           | -0.495407831 | -6.310103402  | -0.218492002  | -6.196643202  | -1.511554154 | -1.587997882 | 9.554130242 | Slc39a4                 | solute carrier family zinc ion transmemb       | full-length                                |             |                |
| 10430174           | 0.813447524  | 4.696158923   | 1.415581923   | 10.14043318   | 1.308066779  | 9.76851272   | 11.22478343 | Apol9a /// Apol9b       | apolipoprotein L 9a ---                        | full-length                                |             |                |
| 10430190           | 1.793706532  | 6.791595894   | 0.312972565   | -5.094409772  | 2.754514976  | 11.43760276  | 5.561483606 | Apol11b /// Apol10t     | apolipoprotein L 11 ---                        | full-length                                |             |                |
| 10430201           | 0.908113346  | 4.069556212   | 0.040095645   | -6.335382948  | 1.016784774  | 4.892590066  | 9.663875234 | Myh9                    | myosin, heavy poly microfilament moto          | full-length                                |             |                |
| 10430302           | 1.642667929  | 5.684467469   | 0.040162886   | -6.368582884  | 1.929517323  | 7.101505619  | 6.621200507 | Csf2rb2                 | colony stimulating f receptor activity /// l   | full-length                                |             |                |
| 10430344           | 1.773893886  | 8.510522376   | 0.026059524   | -6.378125638  | 2.041793245  | 9.748070163  | 6.242377276 | Il2rb                   | interleukin 2 recept receptor activity /// l   | full-length                                |             |                |
| 10430372           | 2.356779373  | 14.12524268   | 0.397363153   | -2.900269987  | 2.305409345  | 13.47082264  | 8.233053659 | Rac2                    | RAS-related C3 bot nucleotide binding /        | full-length                                |             |                |
| 10430883           | -1.047927229 | -3.528717329  | 0.379529775   | -5.779138658  | -1.675249468 | -0.451770473 | 10.36108874 | Cyp2d13                 | cytochrome P450, f cellular_component          | full-length                                |             |                |
| 10430892           | -0.267030392 | -6.7111542289 | 0.525859136   | -4.465499643  | -1.205247289 | -0.704870828 | 10.1082096  | Pcdhb11                 | protocadherin beta calcium ion binding         | full-length                                |             |                |
| 10430899           | -1.20078454  | -1.542695619  | 0.134669255   | -6.281586281  | -2.032357736 | 2.923284374  | 8.485597411 | Cyp2d40                 | cytochrome P450, f---                          | full-length                                |             |                |
| 10430904           | -0.611650983 | -2.341066847  | -0.010963009  | -6.389506336  | -1.155953887 | 2.941862537  | 10.33625098 | ---                     | ---                                            | partial                                    |             |                |
| 10430931           | 1.786420227  | 8.269244146   | 0.22041239    | -5.526380937  | 1.620620088  | 6.699616855  | 6.080490153 | Cluster I Nfam1         | Nfat activating mole molecular_function        | full-length                                |             |                |
| 10431546           | -0.909327214 | -1.776217319  | 0.18291382    | -6.063964627  | -1.547981039 | 2.664256955  | 8.506278506 | Cluster I Tymp /// Sco2 | thymidine phospho phosphorylase activ          | full-length                                |             |                |
| 10431872           | 1.26960455   | 1.018309237   | -0.23140574   | -5.881270033  | 1.147737299  | -0.266249765 | 5.155475309 | ---                     | ---                                            | partial                                    |             |                |
| 10431874           | 1.538111842  | 9.419460569   | -0.043139759  | -6.338995849  | 1.717680682  | 10.30623093  | 6.037791985 | Slc38a1                 | solute carrier family membrane fraction        | full-length                                |             |                |
| 10432511           | 2.2759967    | 6.936479599   | 0.091173195   | -6.314569412  | 1.711152513  | 3.333622363  | 6.290527884 | Racgap1                 | Rac GTPase-activa GTPase activator a           | full-length                                |             |                |
| 10432636           | -0.53183503  | -5.387373287  | 4.32E-05      | -6.391790956  | -1.018097195 | -2.303196747 | 9.476271372 | BC004728                | cDNA sequence BC plasma membrane               | full-length                                |             |                |
| 10432640           | 2.145925805  | 7.12745468    | -0.261422383  | -5.68895799   | 2.094982276  | 6.418167717  | 7.135877657 | ---                     | ---                                            | partial                                    |             |                |
| 10432652           | -2.541275397 | 0.393581144   | -1.61182399   | -2.35885849   | -2.77506375  | 0.842114527  | 7.353592002 | Ela1                    | elastase 1, pancrea ---                        | full-length                                |             |                |
| 10432939           | -1.415889356 | 10.91091988   | -0.341996978  | -2.403031563  | -0.590071913 | 0.792018067  | 10.84800121 | Cluster X Csad          | cysteine sulfinic aci catalytic activity /// s | full-length                                |             |                |
| 10432957           | 1.575497878  | 6.506125438   | -0.205156464  | -5.671731085  | 1.698094196  | 6.939848612  | 6.027632194 | Itgb7                   | integrin beta 7 receptor activity /// l        | full-length                                |             |                |
| 10433101           | 1.030580787  | -2.033582306  | 0.090472388   | -6.332318552  | 1.596089379  | 1.364320075  | 5.661803673 | Gpr84                   | G protein-coupled r signal transducer a        | full-length                                |             |                |
| 10433735           | 1.378627975  | 7.379630497   | 0.188260762   | -5.484326686  | 1.684348665  | 9.307478613  | 6.482743374 | Abcc1                   | ATP-binding casse nucleotide binding /         | full-length                                |             |                |
| 10434758           | 0.580173832  | 0.525794994   | -0.092041411  | -6.039331398  | 1.040674558  | 6.249793159  | 9.169413185 | St6gal1                 | beta galactoside alj beta-galactoside alj      | full-length                                |             |                |
| 10434778           | 1.164211571  | 1.217438448   | 1.912801615   | 6.447257235   | 1.754136705  | 5.105514517  | 9.343740496 | Rtp4                    | receptor transporte membrane /// integri       | full-length                                |             |                |
| 10434934           | -0.735430377 | -3.593990416  | -0.286133147  | -5.704773775  | -1.657121029 | 2.713407549  | 9.968215809 | Cluster X Bdh1          | 3-hydroxybutyrate c catalytic activity /// c   | full-length                                |             |                |
| 10435457           | 0.733701773  | 0.471035525   | 1.05869792    | 4.408213097   | 1.26171546   | 5.700377006  | 8.942648337 | Parp9                   | poly (ADP-ribose) f NAD+ ADP-ribosylt          | full-length                                |             |                |
| 10435497           | 0.840393984  | -4.854990028  | 0.265618131   | -6.113254154  | 1.439997034  | -2.05928526  | 3.690222975 | Sfta211 /// Sfta2       | stefin A2 like 1 /// si endopeptidase inhi     | full-length                                |             |                |
| Affymetrix ID      | BS/Non Inf.  | LS/Non Inf.   | ReIN/Non Inf. | Average       | Cluster      | Gene         | Gene        | Gene Ontology (GC       | Transcript                                     |                                            |             |                |
| Transcript Cluster | logFC        | B             | logFC         | B             | logFC        | B            | expression  | Number                  | Symbol                                         | Title                                      | Description | Classification |
| 10435565           | 2.118670158  | 14.63681336   | -0.078426115  | -6.151882504  | 2.388575717  | 15.66108625  | 8.017027176 | Cluster VI              | Hcls1                                          | hematopoietic cell s protein binding /// n | full-length |                |
| 10435907           | 1.137228931  | 7.590647098   | 0.119600689   | -5.818721563  | 1.131593214  | 7.099930266  | 4.37228433  | Cluster I               | Cd200r1                                        | CD200 receptor 1 receptor activity /// l   | full-length |                |
| 10435982           | 1.139697524  | 2.421238288   | -0.082183192  | -6.282205141  | 1.333608487  | 3.662721335  | 5.016592127 |                         | Btla                                           | B and T lymphocyte immune response-r       | full-length |                |
| 10436100           | 1.483165239  | -3.597910256  | 0.321480112   | -6.170924156  | 2.556185498  | 0.103284521  | 4.850677062 |                         | Retnlg                                         | resistin like gamma molecular_function     | full-length |                |
| 10436106           | 1.609248187  | 1.952511182   | 0.019067187   | -6.389072194  | 1.07740903   | -1.922040583 | 5.497935674 |                         | C330027C09Rik                                  | RIKEN cDNA C330 binding /// cytoplasm      | full-length |                |
| 10436978           | 0.844551139  | -4.29407099   | -0.115553492  | -6.323497693  | 1.86717129   | 1.186841856  | 5.120377719 |                         | Cbr3                                           | carbonyl reductase ---                     | full-length |                |
| 10437224           | 0.67795618   | -5.559988253  | 2.587550364   | 4.115099316   | 1.208721174  | -3.140620739 | 5.972771953 |                         | Mx2                                            | myxovirus (influenz nucleotide binding /   | full-length |                |
| 10437243           | 1.494147386  | 7.548485342   | 0.303145268   | -4.489128824  | 1.192269125  | 4.550219778  | 5.505725786 |                         | Mefv                                           | Mediterranean feve actin binding /// pro   | full-length |                |
| 10437945           | 1.438997105  | 1.064231298   | 0.075313832   | -6.347711692  | 1.328534745  | -0.038151357 | 6.325926571 |                         | Mcm4                                           | minichromosome rr nucleotide binding /     | full-length |                |
| 10438405           | 3.793517437  | 11.51244062   | -0.311239036  | -5.720525578  | 3.384348722  | 9.724402542  | 7.433082037 |                         | Igl-V1 /// Igl                                 | immunoglobulin lan antigen binding /// f   | full-length |                |
| 10438415           | 2.692160172  | 6.66508726    | -0.509884173  | -4.91758581   | 2.783897874  | 6.620156263  | 5.557052576 |                         | ---                                            | ---                                        | full-length |                |
| 10438445           | 1.650281535  | 11.35443274   | -0.090257428  | -6.4992694159 | 1.753479806  | 11.66012571  | 7.434939334 |                         | Klhl6                                          | kelch-like 6 (Drosophila) protein binding  | full-length |                |
| 10438575           | -0.651281857 | -4.509626477  | -0.276353644  | -5.816010114  | -1.741230199 | 2.626230711  | 10.9737441  | Cluster X               | Ehhadh                                         | enoyl-Coenzyme A catalytic activity /// c  | full-length |                |
| 10438738           | 1.95955977   | -1.819883289  | 1.224124976   | -3.79214633   | 0.488786556  | -6.863029562 | 7.521272229 | Cluster V               | Bcl6                                           | B-cell leukemia/lym negative regulation    | full-length |                |
| 10438769           | -0.609206284 | -2.987142496  | -0.039229795  | -6.367534987  | -1.305938773 | 3.248975228  | 9.693129707 |                         | Cldn1                                          | claudin 1 structural molecule              | full-length |                |
| 10439058           | 1.272480571  | 5.58471622    | 0.344789341   | -4.064409219  | 1.277104278  | 5.19957192   | 5.622702681 |                         | Lrrc33                                         | leucine rich repeat protein binding /// rr | full-length |                |
| 10439249           | 1.225533971  | 3.703155898   | 1.552382127   | 6.288628331   | 1.732563042  | 7.166766675  | 8.945483224 |                         | Parp14                                         | poly (ADP-ribose) f nucleic acid binding   | full-length |                |
| 10439312           | 1.295640362  | 3.849878185   | 0.063191162   | -6.32575349   | 1.157028518  | 2.258181535  | 6.586548231 |                         | Cd86                                           | CD86 antigen receptor activity /// c       | full-length |                |
| 10439404           | -1.420205888 | 5.718266346   | -0.583330793  | -1.863455399  | -1.194287735 | 3.392406453  | 5.834661297 |                         | 100043264                                      | predicted gene, 10c ---                    | predicted   |                |

| 10439527           | 0.986353752  | 2.09576891   | 0.225737883  | -5.42420748  | 1.290267116   | 4.526853121  | 6.389275095 | ---                            | ---                                           | ---                                           | full-length       |                |
|--------------------|--------------|--------------|--------------|--------------|---------------|--------------|-------------|--------------------------------|-----------------------------------------------|-----------------------------------------------|-------------------|----------------|
| 10439744           | 1.193169229  | 6.178703303  | 0.021058749  | -6.378587814 | 0.927791694   | 2.99304501   | 3.828303882 | Cd96                           | CD96 antigen                                  | protein binding /// c                         | full-length       |                |
| 10439881           | 0.670296656  | 0.064387487  | 0.251914691  | -4.776490916 | 1.040337068   | 4.059055892  | 5.343532932 | ---                            | ---                                           | ---                                           | partial           |                |
| 10439936           | 1.327683691  | 0.578624727  | 0.350405118  | -5.449953694 | 1.936093129   | 3.996942922  | 7.028171883 | Nfkbiz                         | nuclear factor of ka nucleus /// transcrip    | ---                                           | full-length       |                |
| 10440300           | 0.970398965  | 2.948684415  | 0.1248742    | -6.013260486 | 1.136971735   | 4.230922188  | 7.762257944 | ---                            | ---                                           | ---                                           | predicted         |                |
| 10440393           | 1.813030098  | 7.274848612  | 0.12383542   | -6.156689703 | 1.988844689   | 7.924075991  | 5.972900831 | Samsn1                         | SAM domain, SH3 phosphotyrosine bi            | ---                                           | full-length       |                |
| 10440522           | 1.061569281  | 7.647075554  | 0.009812308  | -6.387118429 | 1.306168803   | 9.665498522  | 7.442104091 | Adamts1                        | a disintegrin-like an ovulation from ovar     | ---                                           | full-length       |                |
| 10440926           | -0.730450912 | -1.613874102 | -0.379667111 | -4.393785977 | -1.231441682  | 2.78551659   | 6.504875978 | Dnajc28                        | DnaJ (Hsp40) hom heat shock protein           | ---                                           | full-length       |                |
| 10440993           | 0.553798819  | -1.620679833 | 0.058772008  | -6.294993536 | 1.247367826   | 5.947926272  | 8.441396538 | Rcan1                          | regulator of calcine nucleus /// cytoplas     | ---                                           | full-length       |                |
| 10441003           | 1.467312988  | 5.043473827  | 0.622949423  | -2.035383266 | 1.632028295   | 5.819753451  | 5.946737289 | Cluster I<br>Rcn1              | runt related transcri skeletal developme      | ---                                           | full-length       |                |
| 10441233           | 1.042584165  | -2.008507551 | 0.966942459  | -1.808183612 | 1.221457362   | -1.103928663 | 5.589674728 | Cluster II<br>Mx1              | myxovirus (influenz nucleotide binding /      | ---                                           | full-length       |                |
| 10441361           | -0.628859043 | 0.047844825  | -0.398622887 | -2.585916729 | -1.021802147  | 4.541085297  | 5.445934645 | Tiam2                          | T-cell lymphoma in receptor signaling p       | ---                                           | full-length       |                |
| 10441601           | 1.137106413  | 4.244098688  | 0.085218782  | -6.225399888 | 1.218684854   | 4.585331255  | 5.804234343 | Tagap                          | T-cell activation Rn ---                      | ---                                           | full-length       |                |
| 10442098           | 0.9470498    | 4.262143823  | -0.00906041  | -6.389035714 | 1.149402355   | 6.002258103  | 4.614580712 | Fpr2 /// Fpr3                  | formyl peptide recep receptor activity /// :  | ---                                           | full-length       |                |
| 10442606           | 1.347603682  | -0.110750903 | 0.378821541  | -5.473021452 | 1.155741532   | -1.707655103 | 7.267708466 | 4930528F23Rik                  | RIKEN cDNA 4930 ---                           | ---                                           | full-length       |                |
| 10442625           | -1.008179153 | 5.601682035  | -0.218639592 | -4.802736484 | -0.86053821   | 3.441296404  | 9.118478135 | Igfals                         | insulin-like growth f protein binding /// e   | ---                                           | full-length       |                |
| 10442914           | -0.806079874 | 1.327970344  | -0.107640869 | -6.094542454 | -1.035237931  | 3.48200314   | 10.2427874  | 0610011F06Rik                  | RIKEN cDNA 0610 ---                           | ---                                           | full-length       |                |
| 10443463           | 1.116339342  | -4.162703907 | 1.272916374  | -2.681979523 | 1.532028425   | -2.548109102 | 8.267880863 | Cluster V<br>Cdkn1a            | cyclin-dependent ki cyclin-dependent pi       | ---                                           | full-length       |                |
| 10443730           | 1.6752258    | 8.974323352  | 0.106839958  | -6.118742667 | 1.650767198   | 8.367697238  | 8.447230901 | Abcg1                          | ATP-binding casse nucleotide binding /        | ---                                           | full-length       |                |
| 10443764           | 0.88208584   | 0.127953849  | 0.268166663  | -5.275570726 | 1.221441554   | 2.917036825  | 6.920328836 | Slc37a1                        | solute carrier family ---                     | ---                                           | full-length       |                |
| 10443786           | -0.488119484 | -4.520128068 | 0.084788926  | -6.292102023 | -1.286835541  | 2.457956343  | 7.607760304 | Pde9a                          | phosphodiesterase catalytic activity /// :    | ---                                           | full-length       |                |
| 10443836           | 0.864536336  | 1.465230914  | 0.121145583  | -6.056092927 | 1.002230624   | 2.555497193  | 5.961292748 | Rrp1b                          | ribosomal RNA pro nucleus /// rRNA pr         | ---                                           | full-length       |                |
| 10443898           | -0.564475587 | -2.973481986 | 0.07682544   | -6.283677695 | -1.046567765  | 1.779365605  | 10.62785536 | Cluster X<br>Cyp4f15           | cytochrome P450, i---                         | ---                                           | full-length       |                |
| 10443980           | 2.807198761  | 11.58492488  | 0.307279841  | -5.228752089 | 3.009101677   | 11.99783168  | 6.887715013 | Cluster VI<br>Myo1f            | myosin IF nucleotide binding /                | ---                                           | full-length       |                |
| 10444068           | 1.110043185  | 9.90380278   | 0.304817358  | -2.139339066 | 1.262867881   | 11.01791592  | 10.50675251 | Cluster IV<br>Tapb             | TAP binding proteir antigen processing        | ---                                           | full-length       |                |
| 10444229           | 1.538799059  | 2.96358935   | -0.022498278 | -6.386746025 | 1.26504782    | 0.635380733  | 6.84628491  | Cluster I<br>H2-DMa            | histocompatibility 2 antigen processing       | ---                                           | full-length       |                |
| 10444236           | 1.867965994  | 5.087384876  | -0.105858405 | -6.280452517 | 1.691874842   | 3.585444112  | 7.196002519 | Cluster I<br>H2-DMb1 /// H2-DM | histocompatibility 2 antigen processing       | ---                                           | full-length       |                |
| 10444244           | 2.253832491  | 13.54040651  | 1.098758596  | 5.241919839  | 2.47518143    | 14.25438161  | 8.580041007 | Cluster VI<br>Tap1             | transporter 1, ATP- nucleotide binding /      | ---                                           | full-length       |                |
| 10444258           | 1.759586238  | 11.20261837  | 0.445329104  | -1.966995805 | 1.807238065   | 11.10001196  | 8.799732379 | Cluster I<br>Psmb8             | proteasome (prosoi endopeptidase acti         | ---                                           | full-length       |                |
| 10444291           | 1.729824887  | 0.501948001  | 0.051561251  | -6.379081369 | 1.529533146   | -0.924148656 | 9.949317767 | Cluster I<br>H2-Ab1            | histocompatibility 2 antigen processing       | ---                                           | full-length       |                |
| 10444298           | 1.745536388  | 0.773882442  | 0.10836264   | -6.333537829 | 1.388321374   | -1.538200176 | 9.037003517 | Cluster I<br>H2-Eb1            | histocompatibility 2 antigen processing       | ---                                           | full-length       |                |
| 10444658           | 1.92353341   | 13.49327829  | 0.041243965  | -6.324665745 | 1.949141623   | 13.25033413  | 7.841183657 | Cluster I<br>Clic1             | chloride intracellula ion channel activity    | ---                                           | full-length       |                |
| 10444780           | 1.116711311  | 8.885819095  | 0.236922926  | -6.300657755 | 1.209096829   | 9.397593004  | 11.90527292 | Cluster IV<br>H2-L /// H2-D1   | histocompatibility 2 antigen processing       | ---                                           | full-length       |                |
| 10444814           | 1.717967204  | 12.05353506  | 0.598490967  | 0.957517097  | 1.885178339   | 12.75020032  | 9.175239684 | H2-gs10                        | MHC class I like pr ---                       | ---                                           | full-length       |                |
| 10444821           | 0.939938356  | 5.917446337  | 0.159602031  | -5.318010524 | 1.092127239   | 7.21432325   | 8.485113558 | H2-Q8                          | histocompatibility 2 antigen processing       | ---                                           | full-length       |                |
| 10444824           | 1.958447916  | 12.37890343  | 0.686998568  | 1.251912658  | 2.100595626   | 12.80481473  | 9.3866276   | H2-Q6                          | histocompatibility 2 ---                      | ---                                           | full-length       |                |
| 10444890           | 0.928000385  | -2.199603921 | 0.028948862  | -6.384590474 | 1.241732482   | -0.204161819 | 5.461780087 | Ier3                           | immediate early res membrane /// integ        | ---                                           | full-length       |                |
| 10444932           | 1.164149321  | 6.628000446  | 0.013307231  | -6.385797616 | 1.303363068   | 7.506895204  | 5.881660628 | 2310014H01Rik                  | RIKEN cDNA 2310 actin binding /// cytr        | ---                                           | full-length       |                |
| 10445112           | 2.695343423  | 11.05281754  | 0.263542537  | -5.52294313  | 3.810465874   | 14.76184318  | 6.219396373 | Ubd                            | ubiquitin D protein modification              | ---                                           | full-length       |                |
| 10445119           | 1.04391677   | 6.564373615  | 0.536043628  | 0.313442151  | 1.019416455   | 5.862735232  | 6.222411154 | Cluster II<br>H2-M3            | histocompatibility 2 positive regulation c    | ---                                           | full-length       |                |
| 10445241           | 1.091650194  | 5.492444062  | 0.106449746  | -6.043893597 | 1.335262391   | 7.375209601  | 7.61061741  | Tnfrsf21                       | tumor necrosis fact receptor activity /// i   | ---                                           | full-length       |                |
| 10445251           | -0.957473618 | 1.445027622  | -0.229031824 | -5.462220276 | -2.548435268  | 12.07420049  | 6.821117462 | Gpr110                         | G protein-coupled r signal transducer a       | ---                                           | full-length       |                |
| 10445293           | 2.597943739  | 6.273633851  | 0.102181672  | -6.325396585 | 3.414060646   | 9.034155329  | 8.39096902  | Pla2g7                         | phospholipase A2, catalytic activity /// :    | ---                                           | full-length       |                |
| 10445558           | -0.366454339 | -5.097320127 | -0.098063851 | -6.214061825 | -1.162403961  | 2.924133919  | 6.614634118 | BC048355                       | cDNA sequence BC nucleus                      | ---                                           | full-length       |                |
| 10445746           | 0.806177275  | -3.454580589 | 0.068235373  | -6.355879639 | 1.261100799   | -0.528303057 | 4.565014359 | Trem1                          | triggering receptor c receptor activity /// i | ---                                           | full-length       |                |
| Affymetrix ID      | BS/Non Inf.  |              | LS/Non Inf.  |              | ReIN/Non Inf. |              | Average     | Cluster                        | Gene                                          | Gene                                          | Gene Ontology (GC | Transcript     |
| Transcript Cluster | logFC        | B            | logFC        | B            | logFC         | B            | expression  | Number                         | Symbol                                        | Title                                         | Description       | Classification |
| 10445753           | 1.619310014  | 8.982910475  | -0.02521188  | -6.375166223 | 1.968813272   | 10.88338154  | 5.481639646 |                                | Trem3                                         | triggering receptor c receptor activity /// i |                   | full-length    |
| 10445758           | 2.202413808  | 5.551881484  | 0.157430348  | -6.20054181  | 2.053987135   | 4.352216969  | 8.582157902 |                                | Trem4                                         | triggering receptor c receptor activity       |                   | full-length    |
| 10445767           | 1.142791353  | 4.780923528  | -0.11186211  | -6.08226432  | 1.162963531   | 4.553126171  | 5.391907312 |                                | Trem12                                        | triggering receptor c receptor activity /// i |                   | full-length    |
| 10445774           | 1.632568301  | 10.29291321  | 0.307130971  | -3.909793386 | 1.897367839   | 11.66636032  | 6.66909564  |                                | B430306N03Rik                                 | RIKEN cDNA B430 receptor activity             |                   | full-length    |
| 10445953           | 1.285630581  | -1.104195277 | 0.002144214  | -6.39176635  | 0.681576887   | -5.096418656 | 7.833197683 |                                | Emr4                                          | EGF-like module c signal transducer a         |                   | full-length    |
| 10446074           | 1.84919339   | 4.228934577  | 0.066122449  | -6.353639697 | 1.556929345   | 2.016450175  | 5.736139862 |                                | Uhrf1                                         | ubiquitin-like, conta DNA binding /// pro     |                   | full-length    |
| 10446253           | 2.416270656  | 16.83445264  | 0.270581787  | -3.739976463 | 2.548274287   | 17.10200665  | 7.212046424 | Cluster VI                     | Vav1                                          | vav 1 oncogene guanyl-nucleotide e            |                   | full-length    |
| 10446282           | 1.817628491  | 3.966384337  | 0.203117831  | -6.045194989 | 1.429124188   | 1.106045818  | 9.015923298 |                                | Emr1                                          | EGF-like module c signal transducer a         |                   | full-length    |
| 10446553           | 1.696078557  | 3.73612301   | 0.15928452   | -6.155224252 | 1.492977432   | 2.005561634  | 6.210383606 |                                | Epb4.113                                      | erythrocyte protein actin binding /// stru    |                   | full-length    |

|               |              |              |              |               |              |              |             |                     |                                              |                                            |             |
|---------------|--------------|--------------|--------------|---------------|--------------|--------------|-------------|---------------------|----------------------------------------------|--------------------------------------------|-------------|
| 10446763      | 1.040612358  | 0.883048197  | -0.160040717 | -6.034289016  | 0.820366752  | -1.516584123 | 7.123892691 | Lbh                 | limb-bud and heart nucleus /// cytoplas      | full-length                                |             |
| 10446777      | -1.314377083 | 6.496499735  | -0.032488626 | -6.364445976  | -1.967182876 | 10.82140006  | 9.002762177 | Ehd3                | EH-domain contain nucleotide binding /       | full-length                                |             |
| 10447594      | 1.077240247  | 8.639261007  | -0.068179549 | -6.13734935   | 0.892801713  | 6.021598788  | 9.265479972 | Dynl1               | dynein light chain T motor activity /// prc  | full-length                                |             |
| 10447602      | 1.362442951  | 8.318672971  | -0.056076953 | -6.288679699  | 1.728194691  | 10.71604293  | 7.683696716 | Ezr                 | ezrin uropod /// binding //                  | full-length                                |             |
| 10448124      | 1.84971366   | 12.59073734  | 0.050281436  | -6.299352475  | 1.872339655  | 12.32516804  | 8.589630726 | Fpr1                | formyl peptide rece signal transducer a      | full-length                                |             |
| 10448202      | 1.474491973  | 7.365051521  | -0.13348706  | -5.978127105  | 1.613011144  | 7.982870378  | 10.10265422 | Tpm4                | tropomyosin 4 podosome /// actin             | full-length                                |             |
| 10448230      | -0.488662795 | -6.097090524 | -0.825587163 | -3.532697959  | -1.076411999 | -3.117384936 | 6.217143022 | LOC280487           | pol polyprotein ---                          | partial                                    |             |
| 10448459      | 0.622563169  | -1.870014438 | -0.140834804 | -5.989796554  | 1.257347869  | 4.355249583  | 7.818047307 | Tbc1d24             | TBC1 domain famil GTPase activator a         | full-length                                |             |
| 10448495      | -1.048742287 | 3.292366096  | -0.099381637 | -6.169932139  | -1.03593091  | 2.758030804  | 8.485406504 | 1600002H07Rik       | RIKEN cDNA 1600 ---                          | full-length                                |             |
| 10448743      | -1.046059865 | 1.295290595  | -0.369021164 | -4.2668129456 | -1.316198435 | 3.22824763   | 8.32627698  | Fahd1               | fumarylacetoacetat magnesium ion bin         | full-length                                |             |
| 10448836      | -0.628883761 | -1.89736954  | -0.061295895 | -6.315806959  | -1.136990017 | 3.123449747  | 7.602567725 | Tmem204             | transmembrane prc plasma membrane            | full-length                                |             |
| 10449245      | -1.52714552  | -0.81982212  | -1.364572295 | -1.020621308  | -1.554591665 | -1.007746616 | 4.234351713 | Pdia2               | protein disulfide iso protein disulfide iso  | full-length                                |             |
| 10449303      | 1.459481097  | 7.986613753  | 0.160025886  | -5.72989637   | 1.521415596  | 8.041762046  | 7.468885339 | Cluster I           | Bak1                                         | BCL2-antagonist/ki leukocyte homeost:      | full-length |
| 10449452      | 0.425254568  | -6.742409127 | 0.291791721  | -6.139494578  | 1.50885449   | -2.742396815 | 9.737641753 | Fkbp5               | FK506 binding prot peptidyl-prolyl cis-tr    | full-length                                |             |
| 10449467      | -2.976818582 | -0.140743959 | -2.251997949 | -1.62300943   | -3.114758703 | -0.09488016  | 6.862724585 | Cluster IX          | Clps                                         | colipase, pancreat extracellular region    | full-length |
| 10449661      | -1.322487467 | -2.808061345 | -1.067383792 | -3.262600432  | -1.344559211 | -2.976617171 | 5.494785472 | Tff2                | trefoil factor 2 (spa: extracellular region  | full-length                                |             |
| 10449940      | -0.663751654 | -5.413127876 | -0.037718489 | -6.385013037  | -1.170424698 | -2.913895192 | 10.43354049 | Cyp4f14             | cytochrome P450, I monooxygenase ac          | full-length                                |             |
| 10449999      | -0.568707892 | -4.954648352 | -0.124265085 | -6.263641049  | -1.172172603 | -0.806645416 | 5.728844895 | Cluster X           | Zfp101                                       | zinc finger protein 1nucleus /// zinc ion  | full-length |
| 10450038      | -1.084090052 | 5.905961098  | 0.040502657  | -6.335583062  | -1.141852127 | 6.068547082  | 10.1315938  | Angptl4             | angiopoietin-like 4 molecular_function       | full-length                                |             |
| 10450145      | 2.224036882  | 10.14892722  | 0.766885223  | -0.419926507  | 2.232775249  | 9.766777477  | 9.552751845 | Cluster VI          | Psmb9                                        | proteasome (proso) endopeptidase acti      | full-length |
| 10450154      | 1.781179563  | 2.565847473  | 0.142451308  | -6.25343954   | 1.560339179  | 0.871080556  | 9.776977452 | Cluster I           | H2-Aa                                        | histocompatibility 2 antigen processing    | full-length |
| 10450374      | 2.753912984  | 16.68917607  | 0.137785926  | -6.25590813   | 3.014837951  | 17.37761257  | 7.68058165  | D17H6S56E-5         | DNA segment, Chr viral envelope              | full-length                                |             |
| 10450444      | -0.529028937 | -1.236852552 | -0.119045341 | -5.925283139  | -1.062774729 | 5.209401157  | 11.07881118 | Apom                | apolipoprotein M lipid transporter act       | full-length                                |             |
| 10450484      | 1.864623454  | 10.67698524  | 0.295030777  | -4.435563708  | 1.811529301  | 9.904895662  | 7.08047346  | Aif1                | allograft inflammac ruffle /// phagocytic    | full-length                                |             |
| 10450496      | 1.209220542  | 3.373026756  | 0.133400239  | -6.08840054   | 1.176595196  | 2.680858979  | 6.878429881 | Lst1                | leukocyte specific ti cell morphogenesis     | full-length                                |             |
| 10450501      | 1.388657468  | -1.69357711  | 0.127770731  | -6.32026928   | 1.767491387  | -0.038330006 | 6.031594066 | Cluster I           | Tnf                                          | tumor necrosis fact negative regulation    | full-length |
| 10450605      | 1.051051005  | 2.006754686  | -0.075890648 | -6.290500457  | 1.024801778  | 1.369728755  | 10.22799912 | Tubb5               | tubulin, beta 5 nucleotide binding /         | full-length                                |             |
| 10450694      | 1.065670646  | 7.588421198  | 0.407249012  | -1.255608631  | 1.247634657  | 9.013140486  | 10.39271794 | H2-T22 /// H2-T10 / | histocompatibility 2 ---                     | full-length                                |             |
| 10450723      | 1.017640367  | 3.681471217  | 0.21419331   | -5.29301222   | 1.199098109  | 5.060544231  | 7.350323445 | H2-T10              | histocompatibility 2 ---                     | full-length                                |             |
| 10451287      | 1.114592054  | 5.548027878  | 2.074627428  | 11.36409224   | 1.731285738  | 10.26737958  | 7.168436177 | Cluster V           | Isg15                                        | ISG15 ubiquitin-like protein binding /// e | full-length |
| 10451291      | -1.672034169 | -1.063243468 | 0.169395974  | -6.290202535  | -2.528055825 | 2.383176819  | 7.648587551 | Slc22a7             | solute carrier family transporter activity , | full-length                                |             |
| 10451547      | 1.176487677  | 6.941068383  | 0.008923698  | -6.389004134  | 0.937952507  | 3.967852619  | 7.000322959 | LOC100043385        | similar to high mobi ---                     | predicted                                  |             |
| 10451710      | 1.060420785  | 1.297030788  | -0.086357382 | -6.280344749  | 1.155286951  | 1.751393194  | 5.912516755 | Rftn1               | raftlin lipid raft linke plasma membrane     | full-length                                |             |
| 10451763      | 1.158463494  | 8.849173736  | 0.397086782  | -1.265514311  | 1.573490688  | 12.07652456  | 5.862075776 | Cluster IV          | Satb1                                        | special AT-rich seq negative regulation    | full-length |
| 10451818      | -0.557483652 | -5.641007735 | 0.185635208  | -6.193987114  | -1.142967074 | -2.395816037 | 5.900782627 | Sult1c2             | sulfotransferase far lysosome /// sulfotr:   | full-length                                |             |
| 10451860      | 1.14950815   | -1.958999026 | -0.041857059 | -6.381308529  | 0.785037415  | -4.495987602 | 6.171729564 | Pot1b               | protection of telomc ---                     | full-length                                |             |
| 10451943      | -1.292386352 | 7.402881626  | 0.070658898  | -6.236838815  | -0.830772865 | 2.125779261  | 8.122545322 | 2310076L09Rik       | RIKEN cDNA 2310 lipid particle               | full-length                                |             |
| 10451953      | 0.533754077  | -4.939084752 | 0.219410937  | -5.945842178  | 1.227093599  | 0.17755241   | 11.66407445 | Lrg1                | leucine-rich alpha-2 ---                     | full-length                                |             |
| 10452485      | 1.158274696  | 6.728270418  | -0.017372424 | -6.381295007  | 0.926607147  | 3.80546563   | 7.421783188 | Rab31               | RAB31, member R, nucleotide binding /        | full-length                                |             |
| 10452648      | 0.909831128  | 1.699191068  | -0.146326532 | -5.932436194  | 1.156704831  | 3.781208669  | 6.581575019 | Emilin2             | elastin microfibril in protein binding /// e | full-length                                |             |
| 10452815      | 0.781862172  | 2.295412921  | 0.476011874  | -1.355438582  | 1.492665557  | 9.119355363  | 10.54554979 | Xdh                 | xanthine dehydroge catalytic activity ///    | full-length                                |             |
| 10452854      | -0.446130636 | -3.498379396 | -0.06521775  | -6.286834203  | -1.336961577 | 6.017332606  | 6.613266776 | Cluster X           | Srd5a2                                       | steroid 5 alpha-red 3-oxo-5-alpha-sterc    | full-length |
| 10452980      | 0.340660131  | -4.574525934 | 1.366669388  | 7.178056379   | 0.603188415  | -1.306160147 | 7.859384946 | Cluster V           | Eif2ak2                                      | eukaryotic translati nucleotide binding /  | full-length |
| 10453026      | -0.685062641 | -2.399017438 | -0.039515203 | -6.368558001  | -1.005421042 | 0.370667686  | 9.892991383 | Prkd3               | protein kinase D3 nucleotide binding /       | full-length                                |             |
| 10453715      | 1.35016213   | 2.114359991  | 0.054259669  | -6.359561198  | 0.958024768  | -1.351737691 | 5.742254083 | ---                 | ---                                          | predicted                                  |             |
| 10453759      | -1.170810218 | 0.588275263  | -0.476649319 | -4.339477997  | -1.413902429 | 2.031303689  | 4.43268366  | ---                 | ---                                          | partial                                    |             |
| 10453867      | 0.655264614  | -0.748175409 | -0.26664891  | -4.817654109  | 1.243094241  | 5.238921274  | 6.710269372 | Rbbp8               | retinoblastoma binc G1/S transition of r     | full-length                                |             |
| 10454015      | -0.871376232 | 1.668428467  | 0.088286103  | -6.206696209  | -1.933692664 | 10.16739805  | 10.83023706 | Ttc39c              | tetratricopeptide rej ---                    | full-length                                |             |
| 10454030      | -1.206890922 | -0.554437758 | 0.13846418   | -6.254033191  | -1.341446145 | 0.016250529  | 5.323092408 | Cabyr               | calcium-binding tyr calcium ion binding      | full-length                                |             |
| 10454039      | 0.672727362  | -0.233349604 | -0.000740622 | -6.391776242  | 1.369675423  | 6.734141625  | 8.525794132 | Impact              | imprinted and ancie negative regulation      | full-length                                |             |
| 10454198      | -0.25571687  | -6.726122153 | 0.149296221  | -6.202441512  | -1.082621247 | -1.339316554 | 11.0708006  | Rnf125              | ring finger protein 1 protein binding /// ir | full-length                                |             |
| 10454286      | 0.889876374  | 2.818490152  | 0.007151272  | -6.39030832   | 1.127503152  | 4.957484853  | 7.994471029 | Cluster III         | Mapre2                                       | microtubule-associ: protein binding /// c  | full-length |
| 10454709      | 1.453795038  | 4.123534883  | -0.011948442 | -6.389808561  | 0.888271299  | -1.012255619 | 5.56699016  | Kif20a              | kinesin family mem nucleotide binding /      | full-length                                |             |
| 10454782      | 1.191071214  | -2.197848419 | 0.387252547  | -5.652790303  | 0.175704232  | -7.182433741 | 6.342220951 | Egr1                | early growth respor negative regulation      | full-length                                |             |
| 10455015      | 1.47775062   | 8.801267107  | 0.254587809  | -4.668396143  | 1.067578069  | 4.63066707   | 8.0078      | ---                 | ---                                          | est                                        |             |
| Affymetrix ID | BS/Non Inf.  | LS/Non Inf.  | LS/Non Inf.  | ReIN/Non Inf. | Average      | Cluster      | Gene        | Gene                | Gene Ontology (GC                            | Transcript                                 |             |

| Transcript Cluster | logFC        | B            | logFC        | B            | logFC        | B            | expression  | Number      | Symbol             | Title                 | Description              | Classification |
|--------------------|--------------|--------------|--------------|--------------|--------------|--------------|-------------|-------------|--------------------|-----------------------|--------------------------|----------------|
| 10455533           | 0.868053987  | -2.646055581 | 0.211225323  | -6.017591434 | 1.34779765   | 0.555832597  | 8.171033047 |             | Eif1a              | eukaryotic translati  | RNA binding /// trar     | full-length    |
| 10455647           | 1.28908237   | 7.802257566  | -0.02802723  | -6.365287186 | 1.295906803  | 7.430902085  | 6.356141617 |             | Tnfrsf8            | tumor necrosis fact   | cytoplasm /// apopt      | full-length    |
| 10455813           | 1.042615551  | 1.258528139  | -0.207285159 | -5.759194567 | 0.787890443  | -1.539186826 | 6.624766481 |             | Lmnb1              | lamin B1              | structural molecule      | full-length    |
| 10455957           | 1.228499573  | -2.049942331 | 0.918374836  | -3.095310448 | 1.129406287  | -2.917315854 | 8.233767417 |             | EG546714           | predicted gene, EG    | ---                      | predicted      |
| 10455961           | 0.973753612  | 5.825855848  | 0.688825577  | 2.553688931  | 1.194675558  | 7.756570169  | 11.75968432 | Cluster II  | ligp1              | interferon inducible  | nucleotide binding /     | full-length    |
| 10455970           | 3.272123556  | 3.106863243  | 2.366983416  | 0.556761766  | 2.39864889   | -0.276163304 | 7.629838105 |             | BC023105           | cDNA sequence BC      | ---                      | full-length    |
| 10456005           | 1.906401481  | 4.444146892  | -0.087041604 | -6.327223531 | 1.660904883  | 2.565145607  | 9.479464669 | Cluster I   | Cd74               | CD74 antigen (inva    | protein binding /// ly   | full-length    |
| 10456071           | 1.254429206  | 1.550943468  | 0.127525146  | -6.209808044 | 0.92648035   | -1.483078306 | 9.441390094 | Cluster III | Csf1r              | colony stimulating f  | nucleotide binding /     | full-length    |
| 10456357           | 0.732353659  | -0.4544337   | 0.000659012  | -6.391781621 | 1.051817519  | 2.605674884  | 6.103746176 |             | Pmaip1             | phorbol-12-myristal   | release of cytochro      | full-length    |
| 10456400           | 1.511840537  | 9.106229913  | -0.023930567 | -6.374247237 | 1.458426761  | 8.248203534  | 7.80170063  |             | Tubb6              | tubulin, beta 6       | nucleotide binding /     | full-length    |
| 10456439           | 1.038815639  | 1.456804159  | 0.043036283  | -6.361794384 | 0.967170909  | 0.406176038  | 5.981632074 |             | Cep192             | centrosomal protein   | ---                      | full-length    |
| 10456490           | 1.362927519  | 3.819536648  | -0.144124763 | -6.088736815 | 0.88243054   | -0.765061376 | 4.492004888 |             | ---                | ---                   | ---                      | partial        |
| 10457203           | 0.887243     | -3.311661423 | 0.448152814  | -5.169530402 | 1.391802431  | -0.295499764 | 7.659872894 |             | ---                | ---                   | ---                      | ---            |
| 10457225           | 1.042965395  | 3.727663792  | 0.272724841  | -4.754082964 | 0.935865319  | 2.191428658  | 6.629561266 | Cluster III | Map3k8             | mitogen-activated f   | nucleotide binding /     | full-length    |
| 10457640           | 1.766205164  | 12.36880803  | -0.045977242 | -6.310062738 | 1.685490718  | 11.3941297   | 8.192710744 |             | S100a11            | S100 calcium bindi    | calcium ion binding      | full-length    |
| 10457667           | -0.488662795 | -6.097090524 | -0.825587163 | -3.532697959 | -1.076411999 | -3.117384936 | 6.217143022 |             | 100043821 /// 1000 | predicted gene, 10    | ---                      | predicted      |
| 10457733           | 1.310877363  | 6.550059153  | 0.223214134  | -5.197133877 | 1.083995375  | 3.99633491   | 5.6671515   |             | B4galt6            | UDP-Gal:betaGlcN      | magnesium ion bin        | full-length    |
| 10458046           | -0.692366194 | -2.638876933 | -0.228675127 | -5.717051552 | -1.144826369 | 1.160379293  | 6.707875805 |             | D0H4S114           | DNA segment, hurr     | protein binding /// r    | full-length    |
| 10458278           | 2.88946772   | 11.26483061  | 0.160347903  | -6.088556817 | 2.726849578  | 10.1479584   | 6.174965608 |             | 2010001M09Rik      | RIKEN cDNA 2010       | extracellular region     | full-length    |
| 10458314           | 1.820156211  | 11.07918591  | -0.124488953 | -5.95013044  | 2.033083822  | 11.98239557  | 7.740144556 | Cluster VI  | Tmem173            | transmembrane prc     | mitochondrion /// m      | full-length    |
| 10458340           | 0.779021062  | 2.320414196  | -0.045037402 | -6.322516351 | 1.044641716  | 5.049250291  | 6.079460435 |             | Hbegf              | heparin-binding EG    | angiogenesis /// bla     | full-length    |
| 10458382           | 1.303677249  | 4.29049128   | 0.268385575  | -5.22200767  | 2.250380673  | 10.17444272  | 6.276383122 | Cluster II  | Cd14               | CD14 antigen          | response to molecu       | full-length    |
| 10458843           | -1.027330326 | 1.619987067  | 0.070378766  | -6.307340577 | -1.310938743 | 3.734443542  | 6.20611498  |             | Sema6a             | sema domain, trans    | protein binding /// p    | full-length    |
| 10459066           | 1.413742363  | 2.652464028  | 0.117368028  | -6.240331859 | 1.541241429  | 3.149062751  | 4.994741396 |             | ---                | ---                   | ---                      | predicted      |
| 10459236           | -0.942963626 | 1.381434336  | -0.092825411 | -6.391624712 | -1.19250182  | 3.376459606  | 8.709411828 |             | Grpel2             | GrpE-like 2, mitoch   | adenyl-nucleotide e      | full-length    |
| 10459262           | -0.960949779 | -0.942274679 | -0.159489743 | -6.114745609 | -1.113951862 | -0.023249367 | 7.002665501 |             | Ablim3             | actin binding LIM p   | actin binding /// cyt    | full-length    |
| 10459288           | 1.121728749  | 0.689450788  | 0.165160023  | -6.076361076 | 1.639125835  | 4.149407807  | 6.297768645 |             | Adrb2              | adrenergic receptor   | regulation of system     | full-length    |
| 10459730           | 2.004408     | 7.668119055  | -0.195526197 | -5.88938663  | 1.741821677  | 5.619259765  | 7.171460388 |             | Me2                | malic enzyme 2, N/    | catalytic activity /// i | full-length    |
| 10459772           | -0.926197054 | 0.915833683  | 0.003018151  | -6.391624795 | -1.24308936  | 3.491993345  | 6.56049869  |             | Lipg               | lipase, endothelial   | catalytic activity /// l | full-length    |
| 10460085           | 0.882051065  | 5.746516892  | -0.012190411 | -6.384284576 | 1.086416057  | 7.720325926  | 9.272447403 |             | Cndp2              | CNDP dipeptidase      | carboxypeptidase a       | full-length    |
| 10460146           | 2.250913326  | 2.412004711  | 0.059582889  | -6.376941991 | 2.041796383  | 1.059745966  | 6.583268641 |             | ---                | ---                   | ---                      | full-length    |
| 10460237           | 1.125442816  | 7.430854889  | 0.332366426  | -6.292052072 | 1.153976715  | 7.289873574  | 8.794796532 | Cluster IV  | Unc93b1            | unc-93 homolog B1     | tol-like receptor sig    | full-length    |
| 10460263           | -0.478392862 | -3.07952269  | -0.101029642 | -6.142835435 | -1.331749178 | 5.970229776  | 9.517888132 |             | Acy3               | aspartoacylase (arr   | aminoacylase activ       | full-length    |
| 10460371           | 0.898761692  | 0.497229079  | 0.119736701  | -6.142769834 | 1.057017722  | 1.668668494  | 6.884615332 |             | Ptprcap            | protein tyrosine ph   | receptor activity /// j  | full-length    |
| 10460738           | 1.565712565  | 5.523393684  | 0.416068478  | -4.159825389 | 1.024589445  | 0.702085325  | 5.374752519 | Cluster III | Cdca5              | cell division cycle   | a protein binding /// n  | full-length    |
| 10460767           | 0.898531108  | -1.671882528 | 0.296258034  | -5.524086354 | 1.508888154  | 2.666001465  | 6.208407445 |             | Batf2              | basic leucine zippe   | DNA binding /// trar     | full-length    |
| 10460833           | 0.943922605  | 4.354992011  | 0.091671677  | -6.109206054 | 1.123645645  | 5.878419729  | 8.121066044 |             | Ehd1               | EH-domain contain     | nucleotide binding /     | full-length    |
| 10461093           | 1.105770262  | 10.51195464  | 0.211369247  | -3.765326494 | 1.197818958  | 11.04302345  | 6.680104296 |             | Pla2g16            | phospholipase A2,     | cell cycle /// membr     | full-length    |
| 10461558           | 2.171567819  | 12.46742094  | 0.467328335  | -2.31169033  | 2.601261152  | 14.20921947  | 8.63452774  |             | Slc15a3            | solute carrier family | transporter activity ,   | full-length    |
| 10461587           | 4.986026362  | 14.12293561  | 0.308831262  | -5.793669366 | 5.582581523  | 15.06649976  | 7.4441669   |             | Ms4a4a             | membrane-spannin      | ---                      | predicted      |
| 10461594           | 2.764149806  | 7.858323095  | 0.27394531   | -5.857398646 | 3.749211828  | 11.04920377  | 6.943540494 |             | Ms4a4c             | membrane-spannin      | ---                      | full-length    |
| 10461605           | 2.486652415  | 12.07357334  | 0.130498929  | -6.081305996 | 2.295308095  | 10.6967029   | 5.02248326  |             | Ms4a4b             | membrane-spannin      | integral to plasma r     | full-length    |
| 10461614           | 3.005638696  | 13.11957774  | 0.931254233  | 0.726433031  | 3.471796862  | 14.43011497  | 8.154908608 |             | Ms4a6c             | membrane-spannin      | receptor activity /// l  | full-length    |
| 10461622           | 3.08140971   | 16.13744997  | 0.691568798  | 0.208163853  | 3.519260077  | 17.30465695  | 7.270745875 |             | Ms4a6b             | membrane-spannin      | receptor activity /// l  | full-length    |
| 10461629           | 0.66855835   | -0.432177206 | 0.279351606  | -4.630511398 | 1.190946775  | 4.952325326  | 7.022685378 |             | Ms4a4d             | membrane-spannin      | receptor activity /// l  | full-length    |
| 10461636           | 1.18485248   | -1.921413322 | 0.085748966  | -6.350059998 | 1.620200185  | 0.333688934  | 3.924021196 |             | ---                | ---                   | ---                      | partial        |
| 10461721           | 2.32020093   | 5.36679273   | 0.825915541  | 3.666249959  | 2.390656823  | 15.2852448   | 10.20896729 |             | Mpeg1              | macrophage expre      | membrane /// integri     | full-length    |
| 10461723           | 2.167127194  | 7.035772671  | 0.430812048  | -4.691492474 | 2.014024203  | 5.764240224  | 6.292205917 |             | 632417K18Rik       | RIKEN cDNA 4632       | ---                      | full-length    |
| 10461728           | -1.282115485 | 7.573415088  | -0.096198335 | -6.094603805 | -1.760492633 | 10.90386251  | 10.35804535 |             | EG240549           | predicted gene, EG    | mitochondrion /// ac     | partial        |
| 10461758           | -1.732729513 | 11.64315163  | -0.334417932 | -3.283600113 | -2.025166293 | 13.09186593  | 10.6983087  |             | Keg1               | kidney expressed g    | mitochondrion /// m      | full-length    |
| 10461765           | 1.440459759  | 3.217757914  | -0.013640667 | -6.389569013 | 1.410298081  | 2.592934444  | 6.209711351 |             | Lpxn               | leupaxin              | cytoplasm /// zinc i     | full-length    |
| 10462390           | 2.78736912   | 7.599532313  | 3.16343673   | -3.163467931 | 3.649312795  | 10.35956334  | 7.636047052 | Cluster VI  | Cd274              | CD274 antigen         | receptor activity /// j  | full-length    |
| 10462587           | 1.241155049  | 1.291163073  | 0.254200485  | -5.718085891 | 1.136471006  | 0.099733469  | 5.633073219 |             | Stambp1            | Stam binding protei   | ubiquitin thiolester     | full-length    |
| 10462613           | 1.481593963  | 3.548550631  | 1.427163311  | 3.495300107  | 2.140806913  | 7.252784224  | 7.577183261 |             | Ifit2              | interferon-induced    | binding                  | full-length    |
| 10462618           | 1.643328326  | 3.983910463  | 2.172402121  | 6.958525221  | 2.406819727  | 7.886113643  | 8.213695562 |             | Ifit3              | interferon-induced    | binding                  | full-length    |

| Affymetrix ID      | BS/Non Inf.  | LS/Non Inf.  | ReIN/Non Inf. | Average      | Cluster      | Gene         | Gene        | Gene Ontology (GC) | Transcript          |                                                         |             |                |
|--------------------|--------------|--------------|---------------|--------------|--------------|--------------|-------------|--------------------|---------------------|---------------------------------------------------------|-------------|----------------|
| Transcript Cluster | logFC        | B            | logFC         | B            | logFC        | B            | expression  | Number             | Symbol              | Title                                                   | Description | Classification |
| 10462621           | 1.016066162  | -1.484637326 | 1.556727505   | 2.789006417  | 1.831845084  | 3.672854343  | 6.558230946 |                    | I830012O16Rik       | RIKEN cDNA I830012O16Rik                                |             | full-length    |
| 10462623           | 1.502610045  | -1.588776881 | 3.279459828   | 6.062178747  | 2.744289084  | 3.666860788  | 9.156570455 |                    | lfit1               | interferon-induced 1 binding                            |             | full-length    |
| 10462632           | 1.211612221  | -0.644640284 | 0.084111167   | -6.338430602 | 0.89008632   | -3.205491742 | 4.435093209 | Cluster III        | Kif20b              | kinesin family mem nucleotide binding /                 |             | full-length    |
| 10462796           | 1.949836308  | 5.330300999  | 0.168039      | -6.126082081 | 1.688314515  | 3.337025651  | 5.591551463 |                    | Kif11               | kinesin family mem nucleotide binding /                 |             | full-length    |
| 10462866           | 1.698659084  | 2.283098604  | 0.005554961   | -6.391569759 | 1.475073982  | 0.529925732  | 4.599056155 |                    | Cep55               | centrosomal protei cell cycle /// mitosis               |             | full-length    |
| 10462973           | 1.552265653  | 0.62779366   | 0.125931711   | -6.295661154 | 1.779368023  | 1.555252371  | 5.511968544 | Cluster I          | Hells               | helicase, lymphoid nucleotide binding /                 |             | full-length    |
| 10463005           | -1.459398902 | -4.001793044 | -0.870568473  | -5.070524843 | -3.129780099 | 1.457991661  | 5.52921232  | Cluster IX         | Cyp2c55             | cytochrome P450, 1 monooxygenase ac                     |             | full-length    |
| 10463027           | -0.983422604 | -2.75436647  | -0.17209444   | -6.201753452 | -1.279543596 | -1.123991437 | 11.96096848 | Cluster X          | Cyp2c29             | cytochrome P450, 1 monooxygenase ac                     |             | full-length    |
| 10463068           | 0.202965545  | -6.768781974 | -0.00677407   | -6.391213266 | 1.008750636  | -0.352968694 | 10.93024361 |                    | Ptp4a1 /// OTTMU5   | protein tyrosine phc phosphoprotein phc                 |             | full-length    |
| Affymetrix ID      | BS/Non Inf.  | LS/Non Inf.  | ReIN/Non Inf. | Average      | Cluster      | Gene         | Gene        | Gene Ontology (GC) | Transcript          |                                                         |             |                |
| Transcript Cluster | logFC        | B            | logFC         | B            | logFC        | B            | expression  | Number             | Symbol              | Title                                                   | Description | Classification |
| 10463070           | 1.851418807  | 12.17021593  | 0.219214337   | -4.926429659 | 2.094441463  | 13.23135304  | 8.300668322 |                    | Entpd1              | ectonucleoside triphosphate magnesium ion bin           |             | full-length    |
| 10463355           | 1.896568656  | 4.348092119  | 0.093226557   | -6.318303974 | 2.015494634  | 4.597023092  | 7.335570164 |                    | Scd2                | stearoyl-Coenzyme stearoyl-CoA 9-des                    |             | full-length    |
| 10463551           | -3.778744336 | 0.657105352  | 0.081357533   | -6.384930272 | -7.195495181 | 7.104959929  | 9.731111606 |                    | Elovl3              | elongation of very long endoplasmic reticul             |             | full-length    |
| 10463599           | 0.962307916  | 0.594554029  | -0.03889199   | -6.367971666 | 1.330756305  | 3.444241594  | 7.444765308 | Cluster IV         | Nfkb2               | nuclear factor of kappa B follicular dendritic c        |             | full-length    |
| 10464298           | -5.019751004 | 0.498481042  | -3.975832135  | -0.801956694 | -5.217591789 | 0.488279426  | 5.901841059 | Cluster IX         | Pnlip               | pancreatic lipase extracellular region                  |             | full-length    |
| 10464313           | -4.298474148 | 0.315037232  | -3.268070107  | -1.240065595 | -4.503162864 | 0.375957815  | 5.221192186 |                    | Pnliprp1            | pancreatic lipase re catalytic activity /// t           |             | full-length    |
| 10464328           | -2.432258263 | -0.908025131 | -1.693042019  | -2.687408316 | -2.223599598 | -1.931458134 | 5.520067273 | Cluster IX         | Pnliprp2            | pancreatic lipase re catalytic activity /// t           |             | full-length    |
| 10464560           | 1.16299988   | 4.050699056  | -0.097901372  | -6.189758525 | 1.073422767  | 2.789021084  | 7.189839358 |                    | Aldh3b1             | aldehyde dehydrogenase catalytic activity               |             | full-length    |
| 10464704           | 0.907255821  | 4.686385504  | 0.074167598   | -6.177971817 | 1.066498292  | 6.07916918   | 8.301217309 | Cluster III        | Adrbk1              | adrenergic receptor nucleotide binding /                |             | full-length    |
| 10465059           | 1.096519691  | 4.612765503  | -0.085178679  | -6.200944504 | 1.08448577   | 4.073277639  | 5.421677934 |                    | Ctsw                | cathepsin W cysteine-type endo                          |             | full-length    |
| 10465342           | -1.030317076 | -3.660503511 | -0.036995235  | -6.385036289 | -1.210736937 | -2.949198917 | 10.69867225 | Cluster X          | Tm7sf2              | transmembrane 7 s endoplasmic reticul                   |             | full-length    |
| 10465587           | 1.693444407  | 10.16831283  | 0.141495409   | -5.831405298 | 1.660797507  | 9.506948997  | 7.135438697 |                    | Fermt3              | fermitin family homology domain                         |             | full-length    |
| 10465726           | 1.266580355  | -1.923794803 | -0.035823943  | -6.385403647 | 1.48012551   | -1.030583758 | 5.451900449 |                    | BC014805            | cDNA sequence BC014805                                  |             | full-length    |
| 10465734           | 1.234841551  | -2.295982004 | 0.116043769   | -6.328475035 | 0.964728751  | -4.065823039 | 5.546187899 |                    | AB056442            | cDNA sequence AB056442                                  |             | full-length    |
| 10465742           | -1.652954084 | -0.511806952 | -0.241430159  | -6.153243457 | -1.879630775 | 0.266971906  | 10.67638585 |                    | C730048C13Rik       | RIKEN cDNA C730048C13Rik                                |             | full-length    |
| 10465764           | -1.549367591 | -0.972624885 | -0.211213408  | -6.204957696 | -1.688484504 | -0.593303224 | 11.5481997  |                    | C730048C13Rik       | RIKEN cDNA C730048C13Rik                                |             | full-length    |
| 10465861           | 1.420603863  | 1.488995167  | 0.049373406   | -6.37052516  | 1.092265265  | -1.21461469  | 5.742649765 | Cluster III        | Incenp              | inner centromere protein chromosome, centr              |             | full-length    |
| 10465895           | -0.388577034 | -6.39511119  | 0.019503233   | -6.389465314 | -1.35490416  | -0.912751916 | 11.49938431 | Cluster X          | Fads2               | fatty acid desaturase stearoyl-CoA 9-des                |             | full-length    |
| 10465912           | 1.2510891    | 7.293768951  | 0.178868904   | -5.416912513 | 1.01190233   | 4.457976935  | 6.334800086 |                    | Fen1                | flap structure specific magnesium ion bin               |             | full-length    |
| 10466008           | 0.047934143  | -7.212090541 | -0.099807486  | -6.109104588 | -1.209288871 | 5.748787635  | 10.90647859 |                    | Dak                 | dihydroxyacetone kinase nucleotide binding /            |             | full-length    |
| 10466127           | 1.636619087  | 11.47631202  | 0.257247423   | -4.222471216 | 1.933210124  | 13.05105344  | 11.34075692 |                    | AW112010            | expressed sequence AW112010                             |             | full-length    |
| 10466130           | 1.964495058  | 4.084074589  | 0.099449656   | -6.317541531 | 2.015519363  | 3.946387798  | 7.008094963 |                    | Ms4a8a              | membrane-spanning receptor activity /// t               |             | full-length    |
| 10466172           | 1.203360755  | 0.750695256  | 0.059652656   | -6.354770095 | 1.217319074  | 0.489085458  | 4.431061248 |                    | Ms4a1               | membrane-spanning receptor activity /// t               |             | full-length    |
| 10466200           | 1.132298365  | 6.563814791  | 0.030523931   | -6.358896858 | 1.546320833  | 9.794466161  | 4.694239761 |                    | Ms4a7               | membrane-spanning receptor activity /// t               |             | full-length    |
| 10466210           | 3.112205938  | 14.63853373  | 0.555739886   | -2.325161784 | 3.99165371   | 17.14472217  | 7.628667648 |                    | Ms4a6d              | membrane-spanning receptor activity /// t               |             | full-length    |
| 10466410           | 1.013903475  | 1.988581452  | 0.026857268   | -6.378115492 | 1.620792135  | 6.674923436  | 6.044552992 |                    | Psat1               | phosphoserine aminotransferase catalytic activity /// t |             | full-length    |
| 10466606           | 1.902520436  | 12.56719753  | -0.140914062  | -5.737640384 | 1.823147699  | 11.64457879  | 7.761414524 |                    | Anxa1               | annexin A1 phospholipase inhib                          |             | full-length    |
| 10466659           | 1.039093665  | 2.367084033  | 0.153630164   | -5.947712245 | 1.752882487  | 7.73923103   | 8.279381075 |                    | Gda                 | guanine deaminase zinc ion binding /// t                |             | full-length    |
| 10466938           | 1.234924516  | 7.454948     | 0.484304433   | -1.15410145  | 1.209748799  | 6.783236747  | 5.987491074 |                    | 5033414D02Rik       | RIKEN cDNA 5033414D02Rik                                |             | full-length    |
| 10467136           | 2.23139962   | 4.464153385  | -0.181187222  | -6.189017938 | 3.193009273  | 8.131547955  | 5.842932533 |                    | Ch25h               | cholesterol 25-hydroxylase cholesterol 25-hydr          |             | full-length    |
| 10467162           | -0.485973925 | -1.878965891 | -0.057457006  | -6.279743793 | -1.085659013 | 5.465672875  | 11.72353271 |                    | Pank1               | pantothenate kinase nucleotide binding /                |             | full-length    |
| 10467258           | 1.743792282  | 8.304126921  | -0.034522795  | -6.36784749  | 2.16151098   | 10.42488712  | 6.773575795 |                    | Myof                | myoferlin protein binding /// n                         |             | full-length    |
| 10467380           | -1.227459889 | 4.630282756  | -0.203845706  | -5.559771897 | -1.534317983 | 6.727543129  | 11.11372254 | Cluster IX         | Cyp2c67             | cytochrome P450, 1 monooxygenase ac                     |             | full-length    |
| 10467390           | -0.679323982 | 0.318456085  | -0.081922589  | -6.194780819 | -1.017023863 | 3.974182851  | 11.78690644 | Cluster X          | Cyp2c40 /// Cyp2c67 | cytochrome P450, 1 monooxygenase ac                     |             | full-length    |
| 10467470           | 1.314609753  | 3.088273489  | -0.034192431  | -6.375454433 | 1.417669415  | 3.478550281  | 6.273448877 |                    | Aldh18a1            | aldehyde dehydrogenase catalytic activity /// t         |             | full-length    |
| 10467578           | 0.586541882  | -0.449422514 | 0.104218207   | -6.036816321 | 1.011810868  | 4.573310485  | 9.749611344 |                    | Pik3ap1             | phosphoinositide-3-kinase transmembrane rec             |             | full-length    |
| 10467637           | 1.281091776  | 6.161719347  | 0.200794235   | -5.428309076 | 0.936677504  | 2.340316923  | 5.487164912 |                    | Arhgap19            | Rho GTPase activator molecular function                 |             | full-length    |
| 10467784           | -0.666140936 | -0.651284599 | -0.108035018  | -6.102709719 | -1.496857138 | 7.313804516  | 6.937847078 | Cluster X          | 4833409A17Rik       | RIKEN cDNA 4833409A17Rik                                |             | full-length    |
| 10467897           | -1.098497015 | -3.519599384 | -0.103969431  | -6.347909421 | -1.871648582 | 0.123379608  | 11.70373801 | Cluster X          | Cyp2c44             | cytochrome P450, 1 monooxygenase ac                     |             | full-length    |
| 10467979           | -1.299861662 | -6.223951391 | 0.064296005   | -6.389060274 | -4.964946688 | 0.730997934  | 11.72412214 | Cluster IX         | Scd1                | stearoyl-Coenzyme stearoyl-CoA 9-des                    |             | full-length    |
| 10468239           | 1.628226296  | -2.491945685 | 0.181851542   | -6.307403634 | 1.876323788  | -1.769586517 | 8.201952358 |                    | Cyp17a1             | cytochrome P450, 1 monooxygenase ac                     |             | full-length    |
| 10468487           | -0.488662795 | -6.097090524 | -0.825587163  | -3.532697959 | -1.076411999 | -3.117384936 | 6.217143022 |                    | LOC280487           | polypeptide ---                                         |             | partial        |
| 10468893           | 0.821631407  | 2.505914089  | 0.236738381   | -4.809370592 | 1.045313051  | 4.666078602  | 7.679715771 |                    | Csf2ra              | colony stimulating factor receptor activity /// t       |             | full-length    |
| 10468898           | 1.355226248  | 3.363232707  | 0.096979944   | -6.262641606 | 1.41530759   | 3.414444433  | 5.403412983 | Cluster I          | Lax1                | lymphocyte transmembrane plasma membrane                |             | full-length    |
| 10469127           | -0.488662795 | -6.097090524 | -0.825587163  | -3.532697959 | -1.076411999 | -3.117384936 | 6.217143022 |                    | 100043821 /// 1000  | predicted gene, 100043821                               |             | est            |



| 10469151           | -1.09904051  | 3.683538683  | -0.358697252  | -4.011651557 | -1.84718356  | 9.185510864  | 6.211024708 |             | lth5               | inter-alpha (globular endopeptidase inhib     | full-length |                |
|--------------------|--------------|--------------|---------------|--------------|--------------|--------------|-------------|-------------|--------------------|-----------------------------------------------|-------------|----------------|
| 10469255           | 1.043544068  | 5.214728599  | -0.114549611  | -5.974501882 | 0.863400911  | 2.750628656  | 5.998005878 | Cluster III | Prkcq              | protein kinase C, th nucleotide binding /     | full-length |                |
| 10469322           | 2.502514974  | 15.4271181   | -0.208275089  | -5.111702718 | 2.610121959  | 15.54949623  | 10.17853404 |             | Vim                | vimentin structural molecule                  | full-length |                |
| 10469358           | -0.334914628 | -5.778514205 | 0.004215786   | -6.391530788 | -1.191121203 | 1.910282519  | 8.790619309 |             | Mrc1               | mannose receptor, receptor activity /// i     | full-length |                |
| 10469559           | -0.553455971 | -1.947956292 | 0.036076356   | -6.358158882 | -1.237654348 | 5.371693234  | 7.279968357 | Cluster X   | Msrb2              | methionine sulfoxid protein-methionine-       | full-length |                |
| 10469695           | 1.515625389  | 10.31404439  | 0.069668518   | -6.212716695 | 1.554868245  | 10.19164936  | 6.152865308 |             | Apbb1ip            | amyloid beta (A4) ꞗ cytoplasm /// cytosk      | full-length |                |
| 10469786           | 0.164780482  | -6.74866932  | -0.063986309  | -6.310895518 | 1.147040946  | 3.095557268  | 4.385367898 | Cluster IV  | Il1f9              | interleukin 1 family, cytokine activity /// i | full-length |                |
| 10469816           | 1.162612069  | 4.476102537  | 0.083360068   | -6.232796699 | 2.104332738  | 10.94604248  | 6.901085021 | Cluster II  | Il1m               | interleukin 1 recept receptor activity /// i  | full-length |                |
| 10470175           | -1.151736031 | 0.248149205  | 0.19826752    | -6.002416157 | -0.969368416 | -1.542616087 | 4.642760215 |             | Lcn13              | lipocalin 13 transporter activity ,           | full-length |                |
| 10470555           | 1.351323335  | 2.125680621  | 0.508036617   | -4.044562247 | 1.057040467  | -0.539325351 | 6.21651426  |             | Gtg1               | globoside alpha-1,ꞗ Golgi apparatus /// i     | full-length |                |
| 10471555           | -0.320794681 | -5.196116014 | -0.215564303  | -5.396313475 | -1.110891505 | 3.567156219  | 6.960526538 |             | Angptl2            | angiopoietin-like 2 receptor binding ///      | full-length |                |
| 10471929           | 1.471319367  | 6.2574927    | 0.216651746   | -5.520648774 | 1.355851953  | 4.90748036   | 5.271438072 |             | Arhgap15           | Rho GTPase activa GTPase activator a          | full-length |                |
| 10472162           | -0.354201633 | -6.229096622 | -0.035024645  | -6.380942152 | -1.023118894 | -1.677103861 | 8.278362786 | Cluster X   | Gpd2               | glycerol phosphate glycerol-3-phospha         | full-length |                |
| 10472501           | 1.386446546  | 2.792861378  | 0.062918096   | -6.344909272 | 1.908121919  | 5.862240339  | 8.272018868 |             | Lass6              | LAG1 homolog, cer DNA binding /// trar        | full-length |                |
| 10472782           | 0.962237676  | 5.638324812  | -0.070126044  | -6.190085999 | 1.07699999   | 6.49487946   | 8.604974033 |             | Hat1               | histone aminotrans histone acetyltransf       | full-length |                |
| 10472820           | 1.67427159   | 2.524216297  | -0.348339332  | -5.515396952 | 1.718186251  | 2.390939912  | 6.683535679 | Cluster I   | Itga6              | integrin alpha 6 receptor activity /// i      | full-length |                |
| 10473022           | 1.840878591  | 9.516247438  | -0.215327435  | -5.437928037 | 1.762595863  | 8.568949184  | 7.444680794 |             | Plp2               | proteolipid protein ꞗ membrane /// integr     | full-length |                |
| 10473125           | 3.040177509  | 14.96289202  | 0.082566369   | -6.254106968 | 3.15719443   | 3.15719443   | 7.736763775 |             | Itga4              | integrin alpha 4 fibronectin binding /        | full-length |                |
| 10473356           | 0.889473419  | 2.783997756  | 0.603111285   | -0.212655311 | 1.195175187  | 5.5804509    | 9.298366494 |             | Ube2l6             | ubiquitin-conjugatin ubiquitin-protein lig    | full-length |                |
| Affymetrix ID      | BS/Non Inf.  | LS/Non Inf.  | ReIN/Non Inf. | Average      | Cluster      | Gene         | Gene        | Gene        | Gene               | Gene Ontology (GC                             | Transcript  |                |
| Transcript Cluster | logFC        | B            | logFC         | B            | logFC        | B            | expression  | Number      | Symbol             | Title                                         | Description | Classification |
| 10473809           | 2.276347359  | 13.17978987  | 0.156697321   | -5.763880538 | 2.333451637  | 13.07123598  | 6.887271262 | Cluster VI  | Sfp1               | SBFV proviral integ DNA binding /// trar      | full-length |                |
| 10474223           | -0.653317953 | -1.906825879 | -0.048673356  | -6.347400731 | -1.00339428  | 1.451262269  | 5.983055728 | Cluster X   | Cd59b              | CD59b antigen negative regulation             | full-length |                |
| 10474700           | 1.429393917  | 4.546001536  | 0.003900972   | -6.391554785 | 2.114859009  | 8.614663777  | 6.760881527 | Cluster II  | Thbs1              | thrombospondin 1 structural molecule          | full-length |                |
| 10474769           | 1.694252799  | 4.254073872  | -0.098473107  | -6.29101682  | 1.274127459  | 0.934172217  | 5.8795331   |             | Dub1b              | budding uninhibitec nucleotide binding /      | full-length |                |
| 10474825           | 1.348332924  | 3.233275253  | 0.359960564   | -4.827029422 | 0.961176156  | -0.414379405 | 5.259583211 |             | D2Ertd750e         | DNA segment, Chr protein binding /// c        | full-length |                |
| 10474875           | 2.069323413  | 4.951738572  | 0.277640499   | -5.80497004  | 1.502060139  | 1.2016752    | 4.718535857 |             | Casc5              | cancer susceptibilit nucleus                  | full-length |                |
| 10474984           | 1.2537303    | 1.476734591  | 0.180259208   | -6.038038947 | 0.727392292  | -3.223205407 | 4.684452844 | Cluster III | Nusap1             | nucleolar and spinc mitotic sister chrom      | full-length |                |
| 10475378           | -0.758797377 | -0.851628764 | -0.417484698  | -3.809338771 | -1.031414275 | 1.574031397  | 5.976881303 |             | Casc4              | cancer susceptibilit membrane /// integr      | full-length |                |
| 10475487           | 1.968727263  | 6.901889108  | 0.045331301   | -6.366327642 | 2.488236245  | 9.22045879   | 5.869697832 |             | Slc28a2            | solute carrier family nucleoside binding      | full-length |                |
| 10475517           | 0.768308943  | -3.806840117 | 0.073828972   | -6.350962746 | 1.990038234  | 3.7825673    | 4.850709738 |             | AA467197           | expressed sequenc nucleus                     | full-length |                |
| 10475866           | 0.993393233  | 1.646458463  | -0.21287927   | -5.605477779 | 1.411874532  | 4.946074487  | 6.546310036 | Cluster IV  | Bcl2l11            | BCL2-like 11 (apop peripheral to memb         | full-length |                |
| 10475990           | 1.321651003  | -0.222691502 | 0.063259436   | -6.363944852 | 1.824248664  | 2.472712141  | 8.843556456 |             | Slc20a1            | solute carrier family receptor activity /// i | full-length |                |
| 10476021           | 2.609838095  | 14.0693225   | 0.222477963   | -5.311369005 | 2.451237167  | 12.92864886  | 8.821230176 | Cluster VI  | Sirpa              | signal-regulatory pr protein binding /// ir   | full-length |                |
| 10476395           | -1.466583564 | 3.417241497  | -0.080949703  | -6.313858329 | -2.024070395 | 6.576874324  | 6.897514685 | Cluster IX  | Bmp2               | bone morphogeneti ossification /// osteo      | full-length |                |
| 10476399           | -0.488662795 | -6.097090524 | -0.825587163  | -3.532697959 | -1.076411999 | -3.117384936 | 6.217143022 |             | 100043821 /// 1000 | predicted gene, 10( ---                       | est         |                |
| 10476590           | -0.80652864  | -3.250836903 | -0.479307348  | -4.726232494 | -1.094123552 | -1.417422763 | 5.756261639 |             | Macrod2            | MACRO domain cc ---                           | full-length |                |
| 10476945           | 1.612151193  | 9.761750156  | 0.076682808   | -6.216996184 | 1.845031353  | 10.9457588   | 5.580810296 |             | Cst7               | cystatin F (leukocys endopeptidase inhib      | full-length |                |
| 10477187           | 2.287114466  | 5.354366738  | 0.230379833   | -6.029966973 | 1.792698443  | 2.322244512  | 5.948502264 |             | Tpx2               | TPX2, microtubule- nucleus /// aster ///      | full-length |                |
| 10477250           | 2.337438242  | 13.59489776  | 0.14689577    | -5.82747763  | 2.58673914   | 14.39972479  | 7.648146316 |             | Hck                | hemopoietic cell kir nucleotide binding /     | full-length |                |
| 10477717           | 1.653046945  | 5.644478407  | -0.172927881  | -5.982425501 | 2.180939091  | 8.424264226  | 6.496627531 | Cluster VI  | Procr              | protein C receptor, receptor activity /// i   | full-length |                |
| 10478048           | 0.910169562  | 1.570409737  | 0.154463421   | -5.894999431 | 1.806274412  | 8.716186554  | 11.83996246 | Cluster IV  | Lbp                | lipopolysaccharide lipopolysaccharide         | full-length |                |
| 10478326           | -1.08985098  | 0.287600729  | -0.155512263  | -6.119442073 | -1.514611201 | 3.141173401  | 9.253589467 |             | Sgk2               | serum/glucocorticoid nucleotide binding /     | full-length |                |
| 10478572           | 1.009483165  | 2.70305541   | -0.075123091  | -6.268622741 | 0.73987763   | -0.611736451 | 5.26826722  | Cluster III | Ube2c              | ubiquitin-conjugatin ubiquitin-protein lig    | full-length |                |
| 10478746           | -0.488662795 | -6.097090524 | -0.825587163  | -3.532697959 | -1.076411999 | -3.117384936 | 6.217143022 |             | 100043821 /// 1000 | predicted gene, 10( ---                       | est         |                |
| 10478897           | 1.545188129  | 11.84018457  | -0.054856567  | -6.253329124 | 1.830065027  | 13.44745795  | 8.576595502 |             | Ptpn1              | protein tyrosine phc phosphoprotein phc       | full-length |                |
| 10479154           | 1.127171583  | 2.725645939  | 0.080661788   | -6.277319369 | 1.395153147  | 4.598200105  | 6.209895047 |             | Tubb1              | tubulin, beta 1 nucleotide binding /          | full-length |                |
| 10479811           | -1.156750889 | 0.163185123  | -0.034842992  | -6.379743713 | -1.229963918 | 0.357956207  | 6.78419562  |             | Mcm10              | minichromosome rr nucleus /// DNA rep         | full-length |                |
| 10479950           | 0.986305057  | 6.708816978  | -0.095438479  | -5.970120481 | 1.089400784  | 7.430600981  | 7.407963305 |             | Cugbp2             | CUG triplet repeat, nucleotide binding /      | full-length |                |
| 10479979           | 1.003945769  | -1.348297151 | 0.010880811   | -6.39069996  | 0.755072263  | -3.579009726 | 5.958785638 |             | ---                | ---                                           | est         |                |
| 10480090           | -1.059367462 | 1.903077506  | -0.329063689  | -4.76536529  | -1.724280797 | 6.784493083  | 6.294424228 | Cluster IX  | Itga8              | integrin alpha 8 metanephros devel            | full-length |                |
| 10480347           | 1.783493623  | 9.407880442  | 0.082159487   | -6.237088808 | 1.741157007  | 8.690982313  | 7.739346798 |             | Pip4k2a            | phosphatidylinosito nucleotide binding /      | full-length |                |
| 10480432           | 1.007256885  | 1.945022711  | -0.115663072  | -6.141665516 | 0.571942453  | -3.061366811 | 3.970897341 | Cluster III | Mastl              | microtubule associa nucleotide binding /      | full-length |                |
| 10480714           | 0.745906467  | -0.495507262 | -0.06252931   | -6.311930644 | 1.10793801   | 2.905329345  | 7.444314595 |             | Uap111             | UDP-N-acetylgluco metabolic process /         | full-length |                |
| 10480725           | -0.62017123  | -2.226247105 | 0.05694818    | -6.330124557 | -1.28025693  | 4.058936142  | 7.975430416 |             | BC029214           | cDNA sequence BC( ---                         | full-length |                |
| 10480751           | -0.812513081 | -2.822787455 | 0.008191352   | -6.391164137 | -1.372146758 | 1.095958329  | 11.33875798 | Cluster X   | C8g                | complement compc transporter activity ,       | full-length |                |

| 10481164           | 1.499911038  | 8.188441124  | 0.351713205    | -3.730003063 | 1.742438361  | 9.531294595  | 6.712015649 |                    | Slc2a6             | solute carrier family sugar:hydrogen syr     | full-length |                |
|--------------------|--------------|--------------|----------------|--------------|--------------|--------------|-------------|--------------------|--------------------|----------------------------------------------|-------------|----------------|
| 10481278           | -4.618514149 | 0.287678602  | -3.508298616   | -1.267319969 | -4.5741576   | -0.156064067 | 5.646560443 |                    | Cel                | carboxyl ester lipas carboxylesterase a      | full-length |                |
| 10481435           | -0.452658511 | -2.880627858 | 0.080315205    | -6.203816408 | -1.830777349 | 10.73973843  | 10.25468932 |                    | Ccbl1              | cysteine conjugate- catalytic activity /// c | full-length |                |
| 10481627           | 5.422026923  | 16.25269912  | 0.280252088    | -5.789664209 | 6.199083402  | 17.43109168  | 10.24787587 | Cluster VIII       | Lcn2               | lipocalin 2 transporter activity ,           | full-length |                |
| 10481634           | -1.394724484 | 10.51124781  | -0.812888691   | 4.498990842  | -1.003010376 | 6.20383801   | 9.762130228 |                    | Slc25a25           | solute carrier family binding /// calcium i  | full-length |                |
| 10482059           | 1.297382784  | 4.655290928  | -0.14751016    | -6.01752196  | 1.349124346  | 4.666306011  | 6.611375033 |                    | Ggta1              | glycoprotein galact Golgi apparatus /// i    | full-length |                |
| 10482517           | 0.789310287  | 5.266841605  | 0.743696992    | 4.726737769  | 1.119984884  | 8.889017575  | 8.655197278 |                    | Nmi                | N-myc (and STAT) cytoplasm                   | full-length |                |
| 10482802           | 3.133753561  | 14.05353684  | -0.110863888   | -6.192840249 | 3.30678609   | 14.2982301   | 5.945448866 |                    | Cytip              | cytohesin 1 interact protein binding /// c   | full-length |                |
| 10482929           | 1.213924445  | 8.128884811  | 0.196392235    | -4.999120725 | 1.953828402  | 13.37519537  | 6.740579655 |                    | Ly75               | lymphocyte antigen receptor activity /// l   | full-length |                |
| 10483110           | 0.651924901  | 2.049059179  | 1.159482111    | 8.031769564  | 0.689270922  | 2.21736966   | 8.971028461 | Cluster V          | Ifih1              | interferon induced \ nucleotide binding /    | full-length |                |
| 10483161           | -0.488662795 | -6.097090524 | -0.825587163   | -3.532697959 | -1.076411999 | -3.117384936 | 6.217143022 |                    | 100043821 /// 1000 | predicted gene, 10(---)                      | est         |                |
| 10483249           | 0.969727763  | -1.539572481 | 0.142184462    | -6.204401998 | 1.34629822   | 0.946266159  | 5.693007346 |                    | Gaint3             | UDP-N-acetyl-alpha: polypeptide N-acety      | full-length |                |
| 10483381           | 1.14346345   | 3.620088485  | 0.117881209    | -6.113738454 | 1.306362724  | 4.652829378  | 6.686791978 |                    | Stk39              | serine/threonine kir nucleotide binding /    | full-length |                |
| 10483698           | 1.036669508  | 1.720432057  | 0.146225288    | -6.104292405 | 1.002723807  | 1.015235206  | 6.286672412 |                    | Wipf1              | WAS/WASL interact actin binding /// cyt      | full-length |                |
| 10484261           | 0.22264535   | -6.629486176 | 0.088032791    | -6.288362416 | 1.042231506  | 0.231202691  | 5.663838342 |                    | Cerkl /// Itga4    | ceramide kinase-lik kinase activity /// fit  | full-length |                |
| 10484307           | 1.042377068  | 2.290352498  | -0.288250174   | -4.975611444 | 1.097056524  | 2.414553571  | 5.909022108 |                    | Frzb               | frizzled-related prot protein binding /// e  | full-length |                |
| 10484355           | -0.488662795 | -6.097090524 | -0.825587163   | -3.532697959 | -1.076411999 | -3.117384936 | 6.217143022 |                    | 100043821 /// 1000 | predicted gene, 10(---)                      | est         |                |
| 10485355           | -0.488662795 | -6.097090524 | -0.825587163   | -3.532697959 | -1.076411999 | -3.117384936 | 6.217143022 |                    | 100043821 /// 1000 | predicted gene, 10(---)                      | predicted   |                |
| 10485405           | 2.19778607   | 12.63192896  | 0.1808263      | -5.585504399 | 2.198175872  | 12.22320785  | 7.166124152 |                    | Cd44               | CD44 antigen ureteric bud branch             | full-length |                |
| 10485963           | 1.579041319  | 1.859263967  | 0.091158953    | -6.328738677 | 1.314221035  | -0.232820621 | 6.046620223 |                    | Arhgap11a          | Rho GTPase activa molecular_function         | full-length |                |
| 10486061           | 1.636580761  | 6.955332487  | 0.021141737    | -6.383690769 | 1.653159083  | 6.640092414  | 6.740774706 |                    | Rasgrp1            | RAS guanyl releasi guanyl-nucleotide e       | full-length |                |
| 10486396           | 1.544583646  | 7.535214006  | 0.055232564    | -6.323524553 | 1.517356346  | 6.895712777  | 7.532133852 |                    | Ehd4               | EH-domain contain nucleotide binding /       | full-length |                |
| 10487208           | 2.132013634  | 6.930580439  | 0.175232161    | -6.073086876 | 2.564921095  | 8.663711398  | 5.431067874 |                    | Atp8b4             | ATPase, class I, tyj molecular_function      | full-length |                |
| 10487238           | 1.075451275  | 3.878158087  | 0.291828522    | -4.600700831 | 1.250490616  | 5.116706739  | 7.029848773 |                    | Hdc                | histidine decarboxy catalytic activity /// t | full-length |                |
| 10487340           | 1.346288104  | 0.60358664   | -0.02421615    | -6.38705662  | 0.958127153  | -2.488644529 | 5.605997001 | Cluster III        | Ncaph              | non-SMC condens mitotic cell cycle ///       | full-length |                |
| 10487480           | 1.85170374   | 0.410289633  | 0.076209028    | -6.368060649 | 1.421994546  | -2.09797532  | 4.969871344 |                    | Bub1               | budding uninhibitec nucleotide binding /     | full-length |                |
| 10487577           | 1.470184246  | 2.880917356  | 0.239751447    | -5.801636967 | 0.857762945  | -2.261287653 | 5.496666163 |                    | Ckap2l             | cytoskeleton assoc ---                       | full-length |                |
| 10487588           | 1.487458904  | 5.010420229  | -0.269352787   | -5.34984473  | 1.200556517  | 2.307039784  | 6.472466881 | Cluster I          | Il1a               | interleukin 1 alpha fever /// cytokine ac    | full-length |                |
| 10487823           | 0.937000816  | 2.852510048  | 0.596289547    | -0.666297485 | 1.030714293  | 3.421336319  | 7.743666614 |                    | Siglec1            | sialic acid binding I; protein binding /// s | full-length |                |
| Affymetrix ID      | BS/Non Inf.  | LS/Non Inf.  | ReINF/Non Inf. | Average      | Cluster      | Gene         | Gene        | Gene Ontology (GC) | Transcript         |                                              |             |                |
| Transcript Cluster | logFC        | B            | logFC          | B            | logFC        | B            | expression  | Number             | Symbol             | Title                                        | Description | Classification |
| 10487894           | 0.902658979  | -1.604711239 | -0.076041071   | -6.330375242 | 1.023294616  | -0.931563301 | 6.155330075 |                    | Rassf2             | Ras association (R); protein binding /// c   | full-length | full-length    |
| 10488010           | -0.985082535 | 7.929494214  | -0.045525343   | -6.270308424 | -1.17629024  | 9.596205036  | 11.02519548 | Cluster X          | Hao1               | hydroxyacid oxidas catalytic activity /// c  | full-length | full-length    |
| 10488378           | 0.820779523  | -2.828105627 | -0.015823979   | -6.389502661 | 1.16943537   | -0.459226653 | 7.368731101 |                    | Thbd               | thrombomodulin receptor activity /// t       | full-length | full-length    |
| 10488382           | 2.196648792  | 10.05072932  | -0.000321767   | -6.391789206 | 2.338103101  | 10.367827219 | 7.864071105 |                    | Cd93               | CD93 antigen receptor activity /// l         | full-length | full-length    |
| 10488797           | -1.046676771 | 7.314904487  | -0.061737616   | -6.21445487  | -1.313048792 | 9.55646174   | 10.10297225 |                    | Pxmp4              | peroxisomal memb molecular_function          | full-length | full-length    |
| 10489107           | 2.190013447  | 17.10455946  | 0.694088519    | 4.0771162841 | 2.58830289   | 18.63870009  | 9.489867642 |                    | Samhd1             | SAM domain and H catalytic activity          | full-length | full-length    |
| 10489127           | 1.72691417   | 7.035595823  | 0.140457505    | -6.073955682 | 1.661165552  | 6.157245534  | 6.766258985 |                    | Rbl1               | retinoblastoma-like negative regulation      | full-length | full-length    |
| 10489204           | 1.210349338  | 7.898924156  | -0.114845951   | -5.896990538 | 1.73056493   | 11.72345347  | 10.21912957 |                    | Tgm2               | transglutaminase 2 protein-glutamine g       | full-length | full-length    |
| 10489343           | -1.020362697 | 4.925927418  | -0.49598417    | -1.204491305 | -0.961320444 | 3.8534758    | 6.188048357 |                    | ---                | ---                                          | ---         | full-length    |
| 10489705           | 0.893820493  | 2.197492168  | 0.173000991    | -5.671609089 | 1.653667376  | 8.631553115  | 8.015016919 |                    | Slc13a3            | solute carrier family transporter activity , | full-length | full-length    |
| 10489721           | -0.488662795 | -6.097090524 | -0.825587163   | -3.532697959 | -1.076411999 | -3.117384936 | 6.217143022 |                    | 100043821 /// 1000 | predicted gene, 10(---)                      | est         | est            |
| 10489784           | 1.129847105  | 4.776458203  | 0.000922482    | -6.391768928 | 0.921190013  | 2.195474417  | 6.89857238  |                    | Prex1              | phosphatidylinosito guanyl-nucleotide e      | full-length | full-length    |
| 10489850           | 0.781538063  | 1.524650904  | 0.870342109    | 2.999385161  | 1.204230603  | 5.715675467  | 8.090565356 |                    | Znfx1              | zinc finger, NFX1-tj transcription factor    | full-length | full-length    |
| 10490104           | 1.11031877   | 4.199328841  | 0.182073611    | -5.637317234 | 0.875473487  | 1.340698654  | 6.092918514 | Cluster III        | Aurka              | aurora kinase A nucleotide binding /         | full-length | full-length    |
| 10490150           | 2.167278677  | 11.68300406  | 1.565366321    | 7.543765647  | 3.203619306  | 15.90162988  | 8.144558527 |                    | Zbp1               | Z-DNA binding prot DNA binding /// left-     | full-length | partial        |
| 10490302           | -1.099140789 | -3.03707422  | -0.66495656    | -4.566146086 | -1.038667667 | -3.635738217 | 5.113174204 |                    | 2810021G02Rik      | RIKEN cDNA 2810 nucleus /// zinc ion         | full-length | full-length    |
| 10490736           | 1.05939643   | 2.203802441  | -0.10776939    | -6.184421694 | 0.954374037  | 0.799740609  | 6.492394904 |                    | Rgs19              | regulator of G-proteinal signal transducer a | full-length | full-length    |
| 10490815           | 0.626273718  | -5.384865984 | 0.444880703    | -5.394918177 | 1.58816708   | -0.04577535  | 3.719220959 |                    | EG545500           | predicted gene, EG ---                       | predicted   | predicted      |
| 10490838           | -0.090906679 | -7.264961319 | -0.366572097   | -6.157150685 | -1.853971946 | -3.124483211 | 7.159613852 |                    | Fabp5              | fatty acid binding p; transporter activity , | full-length | full-length    |
| 10490903           | 1.594708433  | 8.007296943  | -0.071260628   | -6.276639307 | 1.723753448  | 8.490839003  | 5.829475019 |                    | Car13              | carbonic anhydrase carbonate dehydrat        | full-length | full-length    |
| 10490913           | -1.427361545 | -4.399947827 | -0.038265739   | -6.389270431 | -2.21013299  | -2.039857731 | 12.88593209 |                    | Car3               | carbonic anhydrase carbonate dehydrat        | full-length | full-length    |
| 10491171           | -0.126651563 | -6.914563058 | -0.004285614   | -6.391371083 | -1.157099333 | 3.935191732  | 11.46663293 |                    | Slc2a2             | solute carrier family transporter activity , | full-length | full-length    |
| 10491820           | -0.881621768 | -1.342150972 | -0.16465323    | -6.075180347 | -1.215368197 | 1.120574566  | 7.371326175 |                    | ---                | ---                                          | ---         | partial        |
| 10491825           | -1.023493694 | -0.755477346 | -0.289789207   | -5.582842608 | -1.457525049 | 2.154534068  | 8.294847327 |                    | 3110057O12Rik      | RIKEN cDNA 3110 extracellular region         | full-length | full-length    |
| 10492091           | -1.406083063 | 1.778749749  | -0.339470485   | -5.384489922 | -0.920394222 | -2.214397792 | 6.991975435 |                    | Smad9              | MAD homolog 9 (D transcription factor        | full-length | full-length    |

|          |              |              |              |              |              |              |             |             |                                          |                                             |             |
|----------|--------------|--------------|--------------|--------------|--------------|--------------|-------------|-------------|------------------------------------------|---------------------------------------------|-------------|
| 10492306 | -1.538005023 | 5.152888223  | -0.369577344 | -4.617708703 | -2.525921069 | 10.51328669  | 8.146746129 | Sucnr1      | succinate receptor                       | signal transducer a                         | full-length |
| 10492330 | -0.987700718 | 0.727339732  | -0.066443367 | -6.324116146 | -1.1803411   | 2.076567839  | 7.270819935 | P2ry1       | purinergic receptor                      | signal transducer a                         | full-length |
| 10492335 | 1.390197359  | 5.989864168  | 0.064238671  | -6.304739568 | 1.428579417  | 5.87115285   | 6.825175127 | Rap2b       | RAP2B, member of nucleotide binding /    |                                             | full-length |
| 10492355 | -1.972058483 | -2.398509281 | -0.019475285 | -6.391108652 | -2.555377739 | -0.723329521 | 7.707558343 | Mme         | membrane metallo metalloendopeptidase    |                                             | full-length |
| 10492709 | -1.10420078  | 4.755080807  | 0.102439929  | -6.114352213 | -0.547543446 | -2.176818813 | 6.746506592 | Accn5       | amiloride-sensitive ion channel activity |                                             | full-length |
| 10492964 | 2.054120144  | 8.480746272  | 0.32839555   | -4.953296319 | 1.9554283619 | 1.9554283619 | 10.52916924 | Cd5l        | CD5 antigen-like scavenger receptor      |                                             | full-length |
| 10493267 | 1.379408241  | 6.291817394  | 0.108063175  | -6.131506904 | 1.310039654  | 5.278431511  | 6.586090015 | Cluster III | Arhgef2                                  | rho/rac guanine nuc cell morphogenesis      | full-length |
| 10493382 | -0.214911884 | -6.658169959 | 0.010809969  | -6.39018176  | -1.72812515  | 5.573660868  | 10.44931984 |             | Pkfr                                     | pyruvate kinase livr magnesium ion bin      | full-length |
| 10493494 | -0.376055168 | -5.598076293 | 0.34861437   | -4.960545672 | -1.063046077 | 0.32077515   | 5.781147173 |             | OTTMUSG000000                            | predicted gene, OT ---                      | est         |
| 10493565 | 0.549360285  | -2.203700476 | 1.17638093   | 5.065378109  | 0.959920239  | 2.332170282  | 7.961050431 | Cluster V   | Adar                                     | adenosine deaminase DNA binding /// left-   | full-length |
| 10493812 | 0.999658342  | -1.20553094  | -0.086885369 | -6.319455893 | 1.225937422  | 0.190172335  | 4.931077818 |             | S100a4                                   | S100 calcium bindii calcium ion binding     | full-length |
| 10493820 | 2.296802396  | 6.484542299  | -0.079777326 | -6.338016921 | 2.390666549  | 6.514419374  | 6.401541876 |             | S100a6                                   | S100 calcium bindii calcium ion binding     | full-length |
| 10493831 | 1.758579557  | -2.514106685 | 0.147641968  | -6.344279803 | 2.93520884   | 1.430012164  | 5.334916203 |             | S100a8                                   | S100 calcium bindii calcium ion binding     | full-length |
| 10493990 | 1.777697873  | 11.85901845  | -0.070688835 | -6.218009485 | 1.746375887  | 11.22758032  | 8.438467007 |             | S100a11                                  | S100 calcium bindii calcium ion binding     | full-length |
| 10494085 | -1.504956893 | 5.847725171  | 0.013048054  | -6.388782566 | -1.838775915 | 7.730653007  | 11.44435794 |             | Selenbp2                                 | selenium binding pi nucleus /// cytoplas    | full-length |
| 10494200 | 0.905656274  | 5.004684097  | -0.062057027 | -6.232017507 | 1.023967446  | 5.962479367  | 7.887207167 |             | Cdc42se1                                 | CDC42 small effect molecular_function       | full-length |
| 10494271 | 1.805060349  | 14.41137887  | 0.31312555   | -2.607897327 | 1.846231506  | 14.29088649  | 10.85415198 |             | Ctss                                     | cathepsin S cysteine-type endo              | full-length |
| 10494402 | 2.03927033   | 9.825098051  | 0.148761463  | -6.093375109 | 2.03263627   | 7.448767931  | 9.772640277 |             | Hist2h3c1 /// Hist1h                     | histone cluster 2, H nucleosome /// DN/     | full-length |
| 10494405 | 2.652913096  | 10.42586529  | 0.201708481  | -5.904442389 | 2.316343401  | 8.383221114  | 10.25997666 | Cluster VI  | Hist1h3i /// Hist2h3                     | histone cluster 1, H nucleosome /// DN/     | full-length |
| 10494407 | 1.226955146  | 3.266511383  | -0.032853118 | -6.373882845 | 1.167441713  | 2.347156158  | 5.686962689 |             | Hist2h2bb                                | histone cluster 2, H nucleosome /// DN/     | full-length |
| 10494428 | -1.194767303 | 5.006952945  | -0.505645951 | -2.07561042  | -1.658245952 | 8.351119618  | 10.42168866 |             | Txnip                                    | thioredoxin interact enzyme inhibitor ac    | full-length |
| 10494978 | 2.203143558  | 13.42807981  | 0.264158951  | -4.584654698 | 2.342397764  | 13.75701655  | 5.656789039 | Cluster VI  | Ptpn22                                   | protein tyrosine phc phosphoprotein phc     | full-length |
| 10495054 | 0.976844801  | 3.873447258  | -0.06495891  | -6.269029634 | 1.311118981  | 6.747761519  | 7.902039064 |             | Rhoc                                     | ras homolog gene f nucleotide binding /     | full-length |
| 10495186 | 0.824301174  | -0.711695591 | -0.115664347 | -6.181346497 | 1.107906276  | 1.628782911  | 4.109839783 |             | Al504432                                 | expressed sequenc ---                       | full-length |
| 10495405 | 1.453969597  | 7.105962576  | -0.085669757 | -6.221004679 | 1.456067497  | 6.690657404  | 6.478906338 |             | Slc25a24                                 | solute carrier family binding /// calcium i | full-length |
| 10495518 | -0.693274171 | -1.359419813 | -0.218146885 | -5.534314175 | -1.184343633 | 3.268898491  | 5.681527449 |             | Olfm3                                    | olfactomedin 3 protein binding /// e        | full-length |
| 10495896 | 0.913129916  | 3.2571604    | -0.041265788 | -6.340999143 | 1.002827644  | 3.846864386  | 6.846953768 | Cluster III | Camk2d                                   | calcium/calmodulin G1/S transition of r     | full-length |
| 10495967 | 1.354234742  | 0.827011826  | 0.124588025  | -6.263104704 | 2.381974553  | 6.396731559  | 9.040940457 |             | Tifa                                     | TRAF-interacting pi protein binding /// c   | full-length |
| 10495993 | 0.07569608   | -7.261208423 | -0.183283114 | -6.284979671 | -1.709707887 | -1.633310084 | 9.219813751 | Cluster X   | Elov6                                    | ELOVL family mem mitochondrion /// er       | full-length |
| 10496077 | -0.67019505  | -3.573502718 | -0.106317566 | -6.271527148 | -1.062430195 | -0.590630599 | 10.90189143 |             | Agxt21                                   | alanine-glyoxylate t molecular_function     | full-length |
| 10496167 | -0.488662795 | -6.097090524 | -0.825587163 | -3.532697959 | -1.076411999 | -3.117384936 | 6.217143022 |             | 100043821 /// 1000                       | predicted gene, 10( ---                     | est         |
| 10496204 | 1.695650222  | 6.139390726  | 0.185005073  | -5.908723217 | 1.361047196  | 3.291607718  | 4.443752023 |             | Cenpe                                    | centromere protein nucleotide binding /     | full-length |
| 10496251 | -0.964290777 | 0.643438373  | -0.040767926 | -6.365456111 | -1.248245797 | 2.805580845  | 8.534815189 | Cluster X   | Bdh2                                     | 3-hydroxybutyrate c molecular_function      | full-length |
| 10496336 | -0.488662795 | -6.097090524 | -0.825587163 | -3.532697959 | -1.076411999 | -3.117384936 | 6.217143022 |             | 100043821 /// 1000                       | predicted gene, 10( ---                     | est         |
| 10496462 | -2.21497949  | 6.256828344  | -0.345880155 | -5.420028583 | -3.223494496 | 10.2348597   | 7.204933661 |             | Adh6-ps1                                 | alcohol dehydroger ---                      | est         |
| 10496466 | -0.759348365 | -2.771787547 | -0.068934639 | -6.340368337 | -1.321410999 | 1.461886207  | 11.20726209 | Cluster X   | Adh4                                     | alcohol dehydroger NADPH:quinone re         | full-length |
| 10496539 | 2.854213321  | 11.02144562  | 0.816850256  | -1.248233075 | 3.400255208  | 12.69614175  | 6.761024783 | Cluster VI  | Gbp5                                     | guanylate binding p nucleotide binding /    | full-length |
| 10496555 | 2.232860934  | 4.746793524  | 0.547898981  | -4.665511057 | 1.816516982  | 2.146092557  | 7.126066346 | Cluster I   | Gbp5 /// Gbp1                            | guanylate binding p nucleotide binding /    | full-length |
| 10496569 | 2.50615924   | 12.81241891  | 1.39531857   | 5.93746963   | 3.280003354  | 15.59183685  | 9.502672628 |             | Gbp6                                     | guanylate binding p ---                     | full-length |

| Affymetrix ID      | BS/Non Inf.  | LS/Non Inf.  | ReIN/Non Inf. | Average      | Cluster      | Gene         | Gene        | Gene Ontology (GC | Transcript         |                                           |             |                |
|--------------------|--------------|--------------|---------------|--------------|--------------|--------------|-------------|-------------------|--------------------|-------------------------------------------|-------------|----------------|
| Transcript Cluster | logFC        | B            | logFC         | B            | logFC        | B            | expression  | Number            | Symbol             | Title                                     | Description | Classification |
| 10496580           | 2.963882834  | 14.66561321  | 1.709195653   | 7.808379768  | 3.884613508  | 17.41547932  | 8.949500648 | Cluster VI        | Gbp3               | guanylate binding p nucleotide binding /  |             | full-length    |
| 10496592           | 4.090107564  | 18.46460104  | 0.80005463    | 0.810977844  | 5.239747688  | 20.78971155  | 9.041489013 |                   | Gbp2               | guanylate binding p nucleotide binding /  |             | full-length    |
| 10496771           | 0.848295535  | 2.894500613  | -0.439878336  | -2.029693971 | 1.082847048  | 5.122465238  | 5.288206063 |                   | Mcoln2             | muclipin 2 ion channel activity           |             | full-length    |
| 10496872           | 0.105441508  | -7.212869645 | -0.204146665  | -6.14943201  | -1.106771509 | -2.561390092 | 8.108222395 |                   | Elt1               | EGF, latrophilin sev signal transducer a  |             | full-length    |
| 10497265           | 1.602293919  | 5.711770862  | -0.267726559  | -5.383800038 | 0.494901118  | -4.472099734 | 7.062811718 |                   | Fabp4              | fatty acid binding pi cytokine production |             | full-length    |
| 10497327           | -0.488662795 | -6.097090524 | -0.825587163  | -3.532697959 | -1.076411999 | -3.117384936 | 6.217143022 |                   | 100043821 /// 1000 | predicted gene, 10( ---                   | est         |                |
| 10497337           | -0.909425065 | -2.044823179 | 0.003249056   | -6.391692323 | -1.295446196 | 0.554801464  | 8.53776767  |                   | Car1               | carbonic anhydrase carbonate dehydrat     |             | full-length    |
| 10497349           | 3.177987358  | 16.22771721  | 0.122437546   | -6.051802313 | 3.061177538  | 15.43834905  | 6.195426107 | Cluster VI        | Sirpb1             | signal-regulatory pr plasma membrane      |             | full-length    |
| 10497356           | 3.011856328  | 11.32795434  | 0.121350449   | -6.228470576 | 2.885852617  | 10.39333336  | 5.796150474 | Cluster VI        | Sirpb1             | signal-regulatory pr plasma membrane      |             | full-length    |
| 10497358           | 3.492406805  | 18.42353986  | 0.105331108   | -6.081046627 | 3.489397154  | 18.11994854  | 6.414803454 | Cluster VIII      | Sirpb1             | signal-regulatory pr plasma membrane      |             | full-length    |
| 10497364           | 3.115699732  | 15.50284029  | 0.150886028   | -5.923354235 | 3.061396461  | 14.92783868  | 6.01226361  | Cluster VI        | Sirpb1             | signal-regulatory pr plasma membrane      |             | full-length    |
| 10497372           | 1.89567073   | 4.12352216   | 0.049689596   | -6.371655074 | 1.749368544  | 2.857209446  | 5.741104927 |                   | 381484             | predicted gene, 38 ---                    |             | full-length    |
| 10497381           | -2.114348761 | 5.626499526  | -0.093957814  | -6.316215326 | -1.434157113 | 1.128976174  | 10.75370078 | Cluster IX        | Cyp7b1             | cytochrome P450, i monooxygenase ac       |             | full-length    |
| 10497463           | -5.918705204 | 0.641683144  | -4.25687709   | -1.378526399 | -6.077101567 | 0.518385455  | 6.084062008 |                   | Cpb1               | carboxypeptidase E carboxypeptidase a     |             | full-length    |
| 10497548           | 0.686323484  | -2.357796721 | 0.022018952   | -6.384508938 | 1.022029263  | 0.559279836  | 8.355804269 |                   | Fndc3b             | fibronectin type III c molecular_function |             | full-length    |

| 10497831           | 2.804679494  | 7.016382663  | 0.18197643    | -6.188390261  | 2.297682686  | 4.335728394  | 6.331291008 | Ccna2       | cyclin A2                               | female pronucleus                           | full-length |                |
|--------------------|--------------|--------------|---------------|---------------|--------------|--------------|-------------|-------------|-----------------------------------------|---------------------------------------------|-------------|----------------|
| 10498273           | 0.869754459  | 2.314938236  | 0.050207653   | -6.322796602  | 1.30343628   | 6.303905314  | 8.183470017 | Tm4sf1      | transmembrane 4 s membrane              | /// integr                                  | full-length |                |
| 10498345           | 1.066422262  | 4.229505024  | 0.272322896   | -4.6287337086 | 0.97528667   | 2.864787964  | 4.774033721 | Gpr171      | G protein-coupled r signal transducer a |                                             | full-length |                |
| 10498350           | 1.131973359  | 5.387571302  | 0.211953089   | -5.212993655  | 1.429854563  | 7.642674968  | 6.095436896 | P2ry14      | purinergic receptor signal transducer a |                                             | full-length |                |
| 10498367           | 2.132316749  | 13.66321598  | 0.364085565   | -3.041337603  | 2.140804027  | 13.3120143   | 7.910850404 | P2ry13      | purinergic receptor signal transducer a |                                             | full-length |                |
| 10498802           | 0.669237012  | -1.206828645 | 0.033740049   | -6.367370069  | 1.118959786  | 3.244980393  | 7.92779443  | Rapgef2     | Rap guaniny nucleu guanyl-nucleotide e  |                                             | full-length |                |
| 10498871           | -0.605416875 | -3.802506755 | -0.06319525   | -6.340476276  | -1.342345369 | 2.163252426  | 7.266984278 | Tmem144     | transmembrane prc membrane              | /// integr                                  | full-length |                |
| 10498992           | 1.583734252  | -0.268014801 | 0.125626294   | -6.316382077  | 2.732048746  | 4.806417864  | 7.358903429 | Cluster VI  | Tlr2                                    | tolllike receptor 2 response to molecu      | full-length |                |
| 10499639           | 1.148444861  | 9.917073815  | 0.270258628   | -3.013270299  | 0.864936844  | 6.160745658  | 6.857180033 | Cluster III | Cks1b                                   | CDC28 protein kinaz cell cycle /// cyclin-c | full-length |                |
| 10499811           | -0.749912186 | 2.62979437   | -0.057855458  | -6.26135351   | -1.425125635 | 9.45449093   | 6.81371053  |             | Npr1                                    | natriuretic peptide r guanylate cyclase ε   | full-length |                |
| 10499861           | 0.868392203  | -4.938878727 | -0.27630983   | -6.120893481  | 1.434833506  | -2.467125706 | 5.006318676 | Cluster IV  | S100a9                                  | S100 calcium bindin calcium ion binding     | full-length |                |
| 10500021           | -0.598605127 | -3.71104111  | -0.116727782  | -6.21945157   | -1.130448477 | 0.758197305  | 7.36619145  |             | Cgn                                     | cingulin molecular_function                 | full-length |                |
| 10500276           | 1.057230924  | 0.318808766  | 0.085514942   | -6.302409849  | 0.930891964  | -1.12261383  | 5.871618035 |             | BC028528                                | cDNA sequence BC extracellular region       | full-length |                |
| 10500283           | -0.907628246 | -4.034302332 | 0.079343894   | -6.360762027  | -1.294123894 | -2.099228282 | 8.846132989 |             | Car14                                   | carbonic anhydrase carbonate dehydrat       | full-length |                |
| 10500333           | 1.030054002  | 2.660153709  | 0.093375732   | -6.21134251   | 0.814047726  | 0.008541734  | 8.643694391 | Cluster III | Hist2h4                                 | histone cluster 2, H nucleosome /// DN/     | full-length |                |
| 10500335           | 1.965315954  | 12.35784153  | 0.413768311   | -2.495672213  | 2.240771132  | 13.51299659  | 7.979055521 | Cluster VI  | Fcgr1                                   | Fc receptor, IgG, hi antibody-dependen      | full-length |                |
| 10500360           | -1.885245988 | 8.309156029  | -0.743437323  | -0.580718924  | -1.816723786 | 7.441634124  | 4.675005969 |             | ---                                     | ---                                         | partial     |                |
| 10500527           | -0.488662795 | -6.097090524 | -0.82587163   | -3.532697959  | -1.076411999 | -3.117384936 | 6.217143022 |             | LOC280487                               | pol polyprotein                             | partial     |                |
| 10500529           | 0.592712485  | -4.913433487 | 0.485607835   | -4.759637517  | 1.026958256  | -2.083890297 | 5.754704695 |             | Phgdh                                   | 3-phosphoglycerate catalytic activity ///   | full-length |                |
| 10500534           | -1.831290894 | 9.614677766  | -0.187486015  | -5.636986015  | -2.109315358 | 10.87414346  | 5.600527943 | Cluster IX  | Hsd3b4                                  | hydroxy-delta-5-ste catalytic activity ///  | full-length |                |
| 10500539           | -1.461290894 | 9.614677766  | -0.187486015  | -5.636986015  | -2.109315358 | 10.87414346  | 5.600527943 | Cluster IX  | Hsd3b4                                  | hydroxy-delta-5-ste catalytic activity ///  | full-length |                |
| 10500545           | -4.83250581  | 3.95255621   | -0.253834241  | -6.300573029  | -7.01891522  | 8.684451519  | 7.804054556 | Cluster IX  | Hsd3b5                                  | hydroxy-delta-5-ste catalytic activity ///  | full-length |                |
| 10500547           | -0.95787231  | -0.844089045 | 0.031123829   | -6.380689317  | -1.959163729 | 5.960366863  | 7.922376311 | Cluster X   | Hsd3b2                                  | hydroxy-delta-5-ste catalytic activity ///  | full-length |                |
| 10500555           | -0.562984572 | 0.220804405  | -0.060260284  | -6.239372205  | -1.209782032 | 7.962405831  | 10.16184924 | Cluster X   | Hsd3b3                                  | hydroxy-delta-5-ste catalytic activity ///  | full-length |                |
| 10500677           | 2.090561007  | 8.903773752  | -0.225180639  | -6.650019446  | 2.13372695   | 8.7132887    | 6.463473438 |             | Cd2                                     | CD2 antigen protein binding /// e           | full-length |                |
| 10501020           | 3.521425603  | -1.533829062 | -0.041952741  | -6.39053951   | 5.760785238  | 2.581837839  | 5.868352879 |             | Chi3l3                                  | chitinase 3-like 3 catalytic activity /// l | full-length |                |
| 10501063           | 2.419626469  | 17.92752791  | 0.102709477   | -5.840760185  | 2.700752331  | 18.82987692  | 9.652832945 |             | Cd53                                    | CD53 antigen membrane /// integr            | full-length |                |
| 10501199           | -0.452464254 | -4.72662594  | -0.089243804  | -6.274955869  | -1.248243828 | 2.441176362  | 9.638588832 |             | Gstm7                                   | glutathione S-transi glutathione transfer   | full-length |                |
| 10501456           | 1.003786545  | 7.133918013  | -0.052857943  | -6.254365475  | 1.113846405  | 7.916344738  | 6.437975495 |             | ---                                     | ---                                         | partial     |                |
| 10501494           | -7.078706891 | 0.898707182  | -5.408247963  | -0.750617638  | -7.182894401 | 0.664028756  | 6.181829707 |             | Amy2 /// Amy2-1 /// amylase 2, pancrez  | extracellular space                         | full-length |                |
| 10501500           | -5.513863339 | 0.455552363  | -4.040526292  | -1.388772766  | -5.519387062 | 0.102692609  | 7.891640469 |             | Amy2 /// Amy2-1 /// amylase 2, pancrez  | extracellular space                         | full-length |                |
| 10501511           | -5.513863339 | 0.455552363  | -4.040526292  | -1.388772766  | -5.519387062 | 0.102692609  | 7.891640469 |             | Amy2 /// Amy2-1 /// amylase 2, pancrez  | extracellular space                         | full-length |                |
| 10501522           | -5.513863339 | 0.455552363  | -4.040526292  | -1.388772766  | -5.519387062 | 0.102692609  | 7.891640469 |             | Amy2 /// Amy2-1 /// amylase 2, pancrez  | extracellular space                         | full-length |                |
| 10501533           | -5.513863339 | 0.455552363  | -4.040526292  | -1.388772766  | -5.519387062 | 0.102692609  | 7.891640469 |             | Amy2 /// Amy2-1 /// amylase 2, pancrez  | extracellular space                         | full-length |                |
| 10501608           | 2.4940662    | 19.29720036  | 0.433103612   | 0.477316281   | 3.028660203  | 21.04402626  | 9.103576726 |             | Vcam1                                   | vascular cell adhes protein binding /// p   | full-length |                |
| 10501832           | -0.703728821 | 0.564580179  | -0.051410778  | -6.314784419  | -1.169113603 | 5.424733821  | 11.62599751 |             | Abcd3                                   | ATP-binding casse nucleotide binding /      | full-length |                |
| 10502042           | 1.158938931  | -3.502102422 | 0.282475121   | -5.811032686  | 2.272198614  | 5.319585729  | 5.743961452 |             | Alpk1                                   | alpha-kinase 1 protein serine/threo         | partial     |                |
| 10502050           | 1.264153495  | 1.019324424  | 0.163111565   | -6.130843877  | 2.508329387  | 8.03877974   | 6.481018994 |             | Alpk1                                   | alpha-kinase 1 protein serine/threo         | partial     |                |
| 10502052           | 1.217642889  | 1.649460101  | 0.357928319   | -4.983309158  | 2.229917526  | 7.862130479  | 5.809516172 |             | Alpk1                                   | alpha-kinase 1 protein serine/threo         | partial     |                |
| 10502214           | -1.441490785 | 5.831756425  | 0.018890704   | -6.384939041  | -1.955023762 | 8.947756     | 7.63025315  | Cluster IX  | Cyp2u1                                  | cytochrome P450, f monooxygenase ac         | full-length |                |
| 10502359           | 1.047123585  | 2.10660925   | -0.17456406   | -5.859242112  | 1.165342151  | 2.803463997  | 5.329258129 |             | Dapp1                                   | dual adaptor for phi protein binding /// c  | full-length |                |
| 10502791           | 1.72980546   | 6.460096346  | 2.451059069   | 9.703244267   | 2.538556691  | 10.54772542  | 8.922873303 |             | Ifi44                                   | interferon-induced i cytoplasm              | full-length |                |
| 10503098           | 1.12087455   | 9.16649602   | 0.22657926    | -4.002854203  | 1.267462966  | 10.2001285   | 8.740269781 | Cluster IV  | Lyn                                     | Yamaguchi sarcom nucleotide binding /       | full-length |                |
| 10503107           | 1.210883621  | -1.479176424 | 0.441200848   | -5.297594013  | 1.123371753  | -2.34224208  | 5.745856049 |             | 6330407A03Rik                           | RIKEN cDNA 6330 ---                         | est         |                |
| 10503259           | 0.71075106   | -3.502199062 | 0.833572592   | -1.766163267  | 1.74806222   | 3.810376611  | 11.11612948 |             | Trp53inp1                               | transformation relat nucleus /// nucleolu   | full-length |                |
| 10503264           | 0.80018273   | -0.546093189 | 0.085283575   | -6.264695021  | 1.145722462  | 2.463499391  | 4.370066467 | Cluster III | Ccne2                                   | cyclin E2 nucleus /// DNA rep               | full-length |                |
| 10504132           | 1.154501975  | 7.682119763  | 0.190441677   | -5.045321599  | 1.457848711  | 10.01149842  | 7.441514734 | Cluster IV  | Ccl19                                   | chemokine (C-C m cytokine activity ///      | full-length |                |
| 10504159           | 1.263902377  | 8.541210455  | 0.179068296   | -5.22511788   | 1.620040715  | 11.0681254   | 7.744442309 | Cluster I   | Ccl19                                   | chemokine (C-C m cytokine activity ///      | full-length |                |
| 10504188           | 1.247460392  | 8.028118294  | 0.208877483   | -4.933193894  | 1.606075678  | 10.59785731  | 7.671031933 | Cluster I   | Ccl19                                   | chemokine (C-C m cytokine activity ///      | full-length |                |
| Affymetrix ID      | BS/Non Inf.  | LS/Non Inf.  | ReIN/Non Inf. | Average       | Cluster      | Gene         | Gene        | Gene        | Gene                                    | Ontology (GC                                | Transcript  |                |
| Transcript Cluster | logFC        | B            | logFC         | B             | logFC        | B            | expression  | Number      | Symbol                                  | Title                                       | Description | Classification |
| 10504450           | 1.374237537  | 4.30695401   | 0.163359013   | -5.97646688   | 1.727983013  | 6.45557898   | 7.325054622 |             | Glipr2                                  | GLI pathogenesis-r extracellular region     |             | full-length    |
| 10504470           | 1.036813654  | 1.216806165  | 0.070051692   | -6.316137341  | 0.934969897  | -0.105357499 | 5.18571552  |             | Melk                                    | maternal embryonic nucleotide binding /     |             | full-length    |
| 10504755           | 1.104173149  | 4.215796045  | 0.068890641   | -6.276610206  | 0.987961819  | 2.624518467  | 5.731324865 |             | ---                                     | ---                                         |             | full-length    |
| 10504957           | 1.659106466  | 2.727341358  | 0.058664783   | -6.363646175  | 1.356978648  | 0.377861056  | 5.874075936 |             | Smc2                                    | structural maintena nucleotide binding /    |             | full-length    |
| 10505237           | -1.835456143 | 4.209594875  | -0.020626952  | -6.388025909  | -2.309321443 | 6.359789196  | 5.641677358 |             | ---                                     | ---                                         |             | partial        |

|          |              |              |              |              |              |              |             |              |                    |                                            |                          |             |
|----------|--------------|--------------|--------------|--------------|--------------|--------------|-------------|--------------|--------------------|--------------------------------------------|--------------------------|-------------|
| 10505240 | -1.824042215 | 5.875474533  | -0.041646578 | -6.37085449  | -2.241176931 | 7.825299864  | 9.654945202 | ---          | ---                | ---                                        | partial                  |             |
| 10505246 | -1.078396876 | 4.186598597  | 0.104751531  | -6.117513776 | -1.433196039 | 6.968534361  | 8.770093611 | ---          | ---                | ---                                        | partial                  |             |
| 10505249 | -1.549320269 | 9.3111143631 | -0.03645657  | -6.351725658 | -1.691131542 | 9.92352641   | 5.308936508 | ---          | ---                | ---                                        | partial                  |             |
| 10505252 | -2.094043322 | 5.89526118   | -0.448497692 | -4.764433154 | -1.594250883 | 2.514799143  | 3.537291186 | ---          | ---                | ---                                        | partial                  |             |
| 10505254 | -1.059310095 | 3.931112576  | 0.056436624  | -6.31188146  | -1.465305959 | 7.159891437  | 9.178442497 | ---          | ---                | ---                                        | partial                  |             |
| 10505258 | -1.078396876 | 4.186598597  | 0.104751531  | -6.117513776 | -1.433196039 | 6.968534361  | 8.770093611 | ---          | ---                | ---                                        | partial                  |             |
| 10505261 | -1.79069742  | 2.923489377  | -0.042707013 | -6.378478522 | -2.502056727 | 6.178757378  | 7.536035166 | ---          | ---                | ---                                        | partial                  |             |
| 10505266 | -3.260832218 | 10.46882506  | 0.268415779  | -5.820240386 | -3.300730203 | 10.1868863   | 5.050715117 | ---          | ---                | ---                                        | est                      |             |
| 10505268 | -3.327199141 | 7.375661503  | -0.048566695 | -6.380674121 | -5.272031533 | 12.41781227  | 8.809710765 | ---          | ---                | ---                                        | partial                  |             |
| 10505445 | 3.697345251  | 9.006854527  | 0.309899347  | -5.924742881 | 4.563266905  | 11.08752886  | 7.292208797 | Cluster VIII | Orm3               | orosomuroid 3                              | regulation of immu       | full-length |
| 10505451 | 4.048123888  | 15.39771843  | 1.293573101  | 2.72557464   | 4.248471717  | 15.59205888  | 10.43849224 | Cluster VIII | Orm2               | orosomuroid 2                              | regulation of immu       | full-length |
| 10505465 | 1.552349619  | 7.385950892  | 0.272769147  | -4.950720894 | 1.492149387  | 6.49569411   | 7.211583109 |              | 6330416G13Rik      | RIKEN cDNA 6330                            | membrane /// integri     | full-length |
| 10505517 | 1.392360012  | 6.537298422  | -0.100535701 | -6.160479341 | 1.426285119  | 6.383264745  | 6.489037468 | Cluster I    | Tlr4               | toll-like receptor 4                       | production of nitric     | full-length |
| 10505954 | -0.743684646 | -2.765931967 | -0.145287766 | -6.172245692 | -1.749566145 | 4.627333442  | 7.457666882 |              | Tek                | endothelial-specific nucleotide binding    | full-length              | full-length |
| 10506301 | -0.551928794 | -4.927852319 | -0.671589256 | -3.242641346 | -1.197141023 | -0.313610272 | 5.054139309 |              | Lepr               | leptin receptor                            | receptor activity /// i  | full-length |
| 10506424 | 1.722933002  | 13.56979114  | 0.048152883  | -6.276686095 | 1.90506514   | 14.3644255   | 11.58666251 |              | Actg1              | actin, gamma, cyto                         | nucleotide binding /     | full-length |
| 10506470 | 0.514724911  | -4.544929581 | -0.090965599 | -6.28975042  | 1.208573121  | 1.248189754  | 6.842369458 |              | 1700024P16Rik      | RIKEN cDNA 1700                            | ---                      | full-length |
| 10507112 | 1.21282565   | 0.449480157  | -0.200612267 | -6.015644977 | 0.979151645  | -1.692920505 | 4.433124852 |              | Stil               | Src/Tal1 interruptin                       | cytoplasm /// multic     | full-length |
| 10507143 | -1.749302798 | 2.676270202  | -0.086035231 | -6.337981857 | -1.199526858 | -1.184359761 | 11.48058243 | Cluster IX   | Cyp4a12a           | cytochrome P450, f                         | monooxygenase ac         | full-length |
| 10507152 | -1.745882186 | 1.760001157  | -0.03744113  | -6.383226571 | -1.029173176 | -2.94100677  | 11.35715876 | Cluster IX   | Cyp4a12b           | cytochrome P450, f                         | ---                      | full-length |
| 10507163 | -1.586173966 | 3.300594136  | -0.293690082 | -5.581814352 | -1.754581961 | 3.969444523  | 10.53782732 | Cluster IX   | Cyp4a10 /// Cyp4a  | cytochrome P450, f                         | monooxygenase ac         | full-length |
| 10507171 | -1.600555938 | 3.737808648  | -0.374337247 | -5.047800779 | -2.050260901 | 6.065245149  | 9.30165601  |              | ---                | ---                                        | ---                      | full-length |
| 10507177 | -1.399312885 | 3.408950784  | -0.305666633 | -5.269435753 | -1.905806228 | 6.415111324  | 11.10098751 |              | ---                | ---                                        | ---                      | full-length |
| 10507551 | -0.40913542  | -5.92499634  | -0.305761199 | -5.621297102 | -1.479917185 | 1.513741854  | 6.674335301 |              | 2610528J11Rik      | RIKEN cDNA 2610                            | membrane /// integri     | full-length |
| 10507594 | 0.786247657  | 0.275984507  | 0.038333276  | -6.359479728 | 1.126266754  | 3.448712353  | 8.348748867 |              | Slc2a1             | solute carrier family transporter activity | full-length              | full-length |
| 10508074 | 1.224172216  | 6.893819036  | -0.020582181 | -6.378220938 | 1.49815728   | 8.829003226  | 5.43016219  | Cluster I    | Csf3r              | colony stimulating f                       | receptor activity /// l  | full-length |
| 10508392 | 0.604579188  | -2.876945203 | -0.021402613 | -6.384193892 | 1.219722557  | 2.792559373  | 8.305394404 | Cluster IV   | Rnf19b             | ring finger protein 1                      | protein binding /// u    | partial     |
| 10508465 | 1.096159238  | 4.341455092  | -0.232706909 | -5.144035353 | 1.054121205  | 3.503736076  | 8.892038057 |              | Marcks1            | MARCKS-like 1                              | calmodulin binding       | full-length |
| 10508651 | 1.428246488  | 3.639934544  | 0.235488087  | -5.700699127 | 1.350735328  | 2.645887997  | 9.082184175 |              | Sdc3               | syndecan 3                                 | cytoskeletal protein     | full-length |
| 10508663 | 2.131432829  | 12.71215782  | 0.105314161  | -6.085221306 | 2.134207432  | 12.31774639  | 9.94727218  |              | Laptm5             | lysosomal-associat                         | cytosome /// transp      | full-length |
| 10508686 | -0.665065811 | 1.579804889  | -0.168309635 | -5.333158024 | -1.172566728 | 7.333785404  | 7.831642648 | Cluster X    | Mecr               | mitochondrial trans                        | catalytic activity /// t | full-length |
| 10508734 | 1.227089815  | 0.659518197  | -0.232228884 | -5.881836148 | 1.771007031  | 3.979533479  | 5.783498594 |              | Ptatr              | platelet-activating f                      | ripolypolysaccharide     | full-length |
| 10508772 | 2.069788983  | 9.938298853  | 0.238854654  | -5.398122014 | 2.214170121  | 10.31473025  | 9.027859568 |              | Fgr                | Gardner-Rasheed f                          | nucleotide binding /     | full-length |
| 10508800 | 0.598241802  | -6.186061261 | 0.814571297  | -4.537040434 | 1.471048151  | -2.678610145 | 11.35434024 |              | LOC433762          | hypothetical gene L                        | ---                      | full-length |
| 10508992 | -0.759562274 | -1.346786733 | -0.091376155 | -6.258688238 | -1.029124337 | 0.949563308  | 7.571644761 |              | Paqr7              | progesterin and adip                       | receptor activity /// t  | full-length |
| 10509063 | 0.724057015  | -2.401637236 | 0.367700106  | -4.802581025 | 2.273292831  | 8.570711406  | 7.107333145 |              | Il22ra1            | interleukin 22 rece                        | ptor activity /// i      | full-length |
| 10509071 | 0.21334721   | -6.73984086  | 0.012148726  | -6.390010416 | 1.676198354  | 4.493302054  | 6.851812466 |              | 9130219A07Rik      | RIKEN cDNA 9130                            | ---                      | est         |
| 10509122 | -0.909022103 | 3.927889361  | -0.277369326 | -4.183375808 | -1.164514333 | 6.26844788   | 5.384640604 |              | Cnr2               | cannabinoid recept                         | signal transducer a      | full-length |
| 10510172 | 2.229784039  | 9.906739667  | 0.087552928  | -6.269238428 | 2.028331702  | 8.351731187  | 7.271841256 |              | Hmgcb              | high mobility group                        | DNA binding /// nuc      | full-length |
| 10510221 | 0.485100034  | -6.389974587 | 0.883388894  | -3.875778153 | 1.46718775   | -2.00126656  | 8.886326633 |              | LOC433762          | hypothetical gene L                        | ---                      | full-length |
| 10510580 | 0.931184299  | 3.274063665  | -0.216429932 | -5.163590948 | 1.324086867  | 6.765598218  | 5.815692187 |              | Tnfrsf9            | tumor necrosis fac                         | receptor activity /// i  | full-length |
| 10511703 | 0.842047827  | -4.430517514 | -0.003120657 | -6.391743419 | 2.072713533  | 1.95990597   | 8.18134533  | Cluster II   | Ripk2              | receptor (TNFRSF)                          | nucleotide binding /     | full-length |
| 10511779 | 1.265676598  | 0.112535437  | 0.049124964  | -6.372024497 | 1.00674632   | -2.081660998 | 5.780640819 |              | Atp6v0d2           | ATPase, H+ transp                          | transport /// ion tran   | full-length |
| 10512067 | 0.676696165  | 1.73026268   | 1.371760957  | 8.96247481   | 0.718724378  | 1.940262323  | 8.862401896 | Cluster V    | Ddx58              | DEAD (Asp-Glu-Ala                          | nucleotide binding /     | full-length |
| 10512322 | 1.263902377  | 8.541210455  | -5.179068296 | -5.22511788  | 1.620040715  | 11.0681254   | 7.744442309 | Cluster I    | Ccl19              | chemokine (C-C m                           | cytokine activity /// t  | full-length |
| 10512372 | 1.291507809  | 7.537817358  | 0.193786292  | -5.283885262 | 1.664054368  | 10.10468174  | 7.658796508 | Cluster I    | Ccl19              | chemokine (C-C m                           | cytokine activity /// t  | full-length |
| 10512463 | -0.488662795 | -6.097090524 | -0.825587163 | -3.532697959 | -1.076411999 | -3.117384936 | 6.217143022 |              | LOC280487          | pol polyprotein                            | ---                      | partial     |
| 10512774 | 1.182610633  | 8.414833724  | 0.033051201  | -6.34326183  | 1.370280674  | 9.730311245  | 5.985724094 |              | Coro2a             | coronin, actin bindi                       | actin binding            | full-length |
| 10512886 | 1.173904512  | -1.050748677 | 0.197090762  | -6.11571038  | 2.207433522  | 4.729970638  | 7.992343589 |              | Acnat2             | acyl-coenzyme A                            | peroxisome /// lipid     | full-length |
| 10513512 | -0.844587145 | -0.920512729 | -0.110923385 | -6.216009249 | -1.048139723 | 0.621945711  | 12.84287633 |              | Apobec3 /// 261001 | apolipoprotein B ml                        | nucleus /// cytoplas     | full-length |
| 10513514 | -1.147172821 | 2.711931858  | -0.005847025 | -6.39120667  | -1.206132765 | 2.829548276  | 4.692947639 |              | Mup5               | major urinary protei                       | transporter activity ,   | full-length |
| 10513529 | -1.469449186 | 3.032749596  | 0.030041371  | -6.3817994   | -1.926975685 | 5.575148705  | 12.2411669  |              | Mup3               | major urinary protei                       | transporter activity ,   | full-length |
| 10513538 | -2.889917101 | 5.623844043  | -0.048292435 | -6.38105518  | -3.246053694 | 6.520896268  | 8.974474653 |              | OTTMUSG000000      | predicted gene, OT                         | extracellular region     | full-length |
| 10513884 | -0.62443526  | -2.965486101 | 0.344831351  | -4.805185009 | -1.097474683 | 1.267175796  | 7.723190895 |              | Tle1               | transducin-like enh                        | negative regulation      | full-length |
| 10514763 | -1.037911163 | -0.634430218 | 0.01096071   | -6.390556991 | -1.181121869 | 0.142731399  | 11.5893039  | Cluster X    | C8a                | complement compo                           | molecular -function      | full-length |
| 10514912 | -1.315696234 | -4.81168371  | 0.016194844  | -6.391350085 | -1.800609574 | -3.472423852 | 8.863544694 | Cluster IX   | Dio1               | deiodinase, iodothy                        | roxine 5'-deiodin        | full-length |

| Affymetrix ID      | BS/Non Inf.  | LS/Non Inf.  | ReIN/Non Inf. | Average      | Cluster      | Gene         | Gene        | Gene Ontology (GC | Transcript   |                       |                        |                |
|--------------------|--------------|--------------|---------------|--------------|--------------|--------------|-------------|-------------------|--------------|-----------------------|------------------------|----------------|
| Transcript Cluster | logFC        | B            | logFC         | B            | logFC        | B            | expression  | Number            | Symbol       | Title                 | Description            | Classification |
| 10515187           | -1.240374971 | -2.380161726 | -0.301128197  | -5.990012881 | -0.958789494 | -4.181687463 | 12.02813561 | Cluster X         | Cyp4a14      | cytochrome P450, f    | monooxygenase ac       | full-length    |
| 10515201           | -0.996936139 | 4.826747692  | -0.180027879  | -5.386393476 | -1.081831399 | 5.315395436  | 7.389424209 | Cluster X         | Cyp4b1       | cytochrome P450, f    | monooxygenase ac       | full-length    |
| 10515257           | 1.119811724  | 2.298966831  | 0.212421331   | -5.685271006 | 0.99340464   | 0.74349973   | 5.418414643 |                   | Rad54l       | RAD54 like (S. cere   | nucleotide binding /   | full-length    |
| 10515431           | 1.465222473  | 2.740900943  | -0.015062334  | -6.389401103 | 0.957056365  | -1.519888442 | 5.34577183  |                   | Kif2c        | kinesin family mem    | nucleotide binding /   | full-length    |
| 10515836           | 2.379249664  | 6.022861486  | -0.29400008   | -5.790342268 | 2.251547677  | 4.974301413  | 5.796594912 |                   | Ccnb1        | cyclin B1             | in utero embryonic     | full-length    |
| 10515943           | 0.864970913  | 0.44763327   | -0.124975421  | -6.102940461 | 1.106779099  | 2.464167249  | 5.713036622 |                   | Ctps         | cytidine 5'-triphospl | catalytic activity /// | full-length    |
| 10516620           | 1.694389687  | 10.30249984  | 0.17363347    | -5.548707385 | 1.631536235  | 9.42277261   | 6.394918544 | Cluster I         | Lck          | lymphocyte protein    | nucleotide binding /   | full-length    |
| 10516735           | 0.844041879  | 2.642137936  | -0.178133083  | -5.47222708  | 1.027530701  | 4.432913267  | 9.019065674 |                   | Tinag1       | tubulointerstitial ne | cysteine-type endo     | full-length    |
| 10516956           | 1.858736245  | 6.418412888  | -0.107797797  | -6.244664402 | 2.006934796  | 6.87173106   | 6.090713256 |                   | Smpdl3b      | sphingomyelin phos    | sphingomyelin phos     | full-length    |
| 10516966           | 2.588968761  | 13.53671939  | 0.652643701   | -0.632349967 | 2.54579908   | 12.93558707  | 8.051175654 |                   | BC013712     | cDNA sequence BC ---  |                        | full-length    |
| 10517141           | 1.23425791   | 5.998878361  | 0.175339373   | -5.611325978 | 0.999460328  | 3.254150911  | 9.388291567 |                   | Hmgm2        | high mobility group   | chromatin /// DNA b    | full-length    |
| 10517165           | 2.787284002  | 18.36674901  | 0.219309129   | -4.541756331 | 2.738496887  | 17.87476476  | 8.028379154 |                   | Cd52         | CD52 antigen          | plasma membrane        | full-length    |
| 10517169           | 2.193709969  | 13.20535468  | 0.046292769   | -6.329843826 | 2.018337369  | 11.80268499  | 8.758177898 |                   | Sh3bgr3      | SH3 domain bindin     | nucleus /// cytoplas   | full-length    |
| 10517508           | 1.651673624  | 8.970014699  | 0.235731943   | -5.128491345 | 1.432561982  | 6.867746858  | 9.798965194 | Cluster I         | C1qb         | complement compc      | extracellular region   | full-length    |
| 10517513           | 1.507213702  | 8.506541118  | 0.052136359   | -6.316437191 | 1.292978497  | 6.287599556  | 9.943914586 | Cluster I         | C1qc         | complement compc      | extracellular region   | full-length    |
| 10517517           | 1.212081704  | 7.093635038  | 0.222952128   | -4.896702241 | 1.022916741  | 4.737124599  | 9.768256547 |                   | C1qa         | complement compc      | extracellular region   | full-length    |
| 10517573           | -4.020076475 | 1.066526237  | -2.973625016  | -0.858394294 | -4.008993513 | 0.667138621  | 6.621416685 |                   | Ela3         | elastase 3, pancre    | ---                    | full-length    |
| 10518050           | -3.462694365 | 0.080181744  | -2.766466163  | -1.073853301 | -3.639056473 | 0.167433849  | 7.239245988 |                   | RP23-395H4.4 | elastase 2A           | serine-type endope     | full-length    |
| 10518069           | 1.032631446  | 2.817935154  | 0.124612889   | -6.065833001 | 1.781728953  | 8.522600898  | 9.351403993 |                   | Efh2         | EF hand domain cc     | calcium ion binding    | full-length    |
| 10518350           | 2.266408038  | 10.83301824  | 0.066612813   | -6.311296172 | 2.108056996  | 9.541218936  | 6.972624932 |                   | Hmgb2        | high mobility group   | DNA binding /// nuc    | full-length    |
| 10518352           | 2.305347254  | 11.33655404  | 0.088733747   | -6.242364556 | 2.129224781  | 9.96217178   | 7.783047024 |                   | Hmgb2        | high mobility group   | DNA binding /// nuc    | full-length    |
| 10518455           | 1.149284052  | 10.08963719  | 0.158852677   | -4.978083181 | 1.141937937  | 9.583810891  | 7.168895658 |                   | Agtrap       | angiotensin II, type  | receptor activity ///  | full-length    |
| 10518570           | 1.019036746  | 10.22361508  | 0.043540111   | -6.23909302  | 0.934764796  | 8.766580599  | 9.276692013 |                   | Pgd          | phosphogluconate      | catalytic activity /// | full-length    |
| 10518686           | 1.598758802  | 6.732289463  | 0.157290799   | -6.954639732 | 1.637922202  | 6.580544325  | 6.972624099 | Cluster I         | Pik3cd       | phosphatidylinosito   | B cell homeostasis     | full-length    |
| 10518927           | 1.400873284  | 8.28010289   | -0.141049576  | -5.801686501 | 1.594007211  | 9.377134244  | 6.135767054 |                   | Kcnab2       | potassium voltage-    | ion channel activity   | full-length    |
| 10519060           | 1.280019499  | 5.704153807  | 0.276476088   | -4.788489348 | 1.509543732  | 7.168188277  | 7.730143514 | Cluster I         | Tnfrsf14     | tumor necrosis fact   | receptor activity ///  | full-length    |
| 10519497           | 1.612248779  | 4.610940813  | 0.158806933   | -6.087735569 | 2.742829652  | 10.35014798  | 11.48310367 |                   | Steap4       | STEAP family mem      | catalytic activity /// | full-length    |
| 10519527           | 0.730722662  | -1.602351296 | -0.143838886  | -6.063157346 | 1.033933813  | 1.049471296  | 6.373375195 |                   | Abcb1a       | ATP-binding casse     | nucleotide binding /   | full-length    |
| 10519717           | 0.37182779   | -4.442789469 | 0.000194516   | -6.391790027 | 1.04205853   | 3.272067154  | 4.362042281 |                   | Sema3a       | sema domain, imm      | regulation of heart    | full-length    |
| 10519983           | 2.559961142  | 14.76732355  | 0.181043256   | -5.538450955 | 2.834605182  | 15.58208948  | 7.423864822 |                   | Fgl2         | fibrinogen-like prote | receptor binding ///   | full-length    |
| 10520483           | -0.719422639 | 0.989909267  | -0.012106436  | -6.38729102  | -1.070196998 | 4.697527603  | 9.704795902 |                   | D5Wsu178e    | DNA segment, Chr      | magnesium ion bin      | full-length    |
| 10521090           | 1.149787559  | 1.430180708  | -0.200974652  | -5.880304315 | 1.006486824  | -0.172834659 | 6.16234815  |                   | Tacc3        | transforming, acidic  | microtubule cytoske    | full-length    |
| 10521337           | 1.03364227   | 0.883496568  | 0.129384459   | -6.152746917 | 1.417694582  | 3.687566613  | 6.22716218  |                   | Rgs12        | regulator of G-prote  | ---                    | full-length    |
| 10521667           | 1.72978259   | 1.622385566  | 0.034205403   | -6.384708897 | 2.722079638  | 6.069471593  | 5.474908448 |                   | Bst1         | bone marrow strom     | catalytic activity /// | full-length    |
| 10521678           | 1.204890737  | 9.303623405  | -0.140772408  | -5.471227047 | 1.437007397  | 1.437007397  | 9.432181133 | Cluster I         | Cd38         | CD38 antigen          | catalytic activity /// | full-length    |
| 10521731           | 1.842467326  | 3.565849461  | 0.071592056   | -6.351957807 | 1.413759053  | 0.524882839  | 4.927158736 |                   | Ncapg        | on-SMC condensin      | molecular_function     | full-length    |
| 10521984           | 1.306492635  | 6.084672192  | 0.085704366   | -6.214648796 | 1.238071405  | 5.050327263  | 6.284279642 |                   | G6pd2        | glucose-6-phospha     | catalytic activity /// | full-length    |
| 10522182           | 0.965086759  | 1.910631568  | 0.145967491   | -5.966689617 | 1.208073108  | 3.844019491  | 5.991735453 |                   | Rhoh         | ras homolog gene f    | nucleotide binding /   | full-length    |
| 10522368           | 1.902127558  | 3.048195535  | 0.267211383   | -5.934821793 | 1.476881222  | 0.185042244  | 7.547637514 |                   | Npal1        | NIPA-like domain c    | ---                    | full-length    |
| 10522742           | -0.488662795 | -6.097090524 | -0.825587163  | -3.532697959 | -1.076411999 | -3.117384936 | 6.217143022 |                   | LOC280487    | pol polyprotein       | ---                    | partial        |
| 10522788           | 1.096315453  | 1.15583001   | 0.018632389   | -6.38703845  | 0.779611118  | -2.077684168 | 4.170000416 |                   | Stap1        | signal transducing    | ; SH3/SH2 adaptor a    | full-length    |
| 10523095           | -0.699819598 | -3.66432302  | -0.083681321  | -6.325346272 | -1.27783002  | 0.522530708  | 10.19779127 |                   | Afm          | afamin                | molecular_function     | full-length    |
| 10523111           | -0.68798233  | 2.864128156  | -0.177800734  | -5.005357588 | -1.168898563 | 8.392738412  | 9.124755368 |                   | ---          | ---                   | ---                    | partial        |
| 10523128           | 2.353735697  | 11.28112705  | -0.085021066  | -6.261217696 | 2.727384639  | 12.62536763  | 6.480180031 |                   | Ppbp         | pro-platelet basic p  | extracellular region   | full-length    |
| 10523134           | 1.130537193  | 3.025673457  | -0.068952728  | -6.303520605 | 1.234365862  | 3.547113811  | 5.506924025 | Cluster I         | Pf4          | platelet factor 4     | cytokine activity ///  | full-length    |
| 10523151           | 1.082928599  | -4.536493553 | 0.103410703   | -6.361719771 | 1.603644197  | -2.56625509  | 7.962662087 | Cluster IV        | Cxcl1        | chemokine (C-X-C      | cytokine activity ///  | full-length    |
| 10523156           | 0.445510488  | -5.259017323 | 0.139755294   | -6.169261462 | 1.208245062  | 0.911598792  | 4.36961213  | Cluster IV        | Cxcl2        | chemokine (C-X-C      | cytokine activity ///  | full-length    |
| 10523245           | -0.869709305 | 0.940314761  | -0.139619593  | -5.998605986 | -1.313227857 | 4.80516275   | 7.063521405 |                   | Gm1381       | gene model 1381, (--- |                        | full-length    |
| 10523451           | 1.259124401  | 1.277238776  | -0.03563931   | -6.378280844 | 0.982456416  | -1.271665933 | 7.232306715 |                   | Anxa3        | annexin A3            | phospholipase inh      | full-length    |
| 10523468           | 1.036774594  | 3.116865653  | -0.084789021  | -6.231203812 | 0.936646446  | 1.682861701  | 6.677464425 | Cluster III       | Bmp2k        | BMP2 inducible kin    | nucleotide binding /   | full-length    |
| 10523766           | 1.120194244  | 5.999778219  | 0.182684333   | -5.381709458 | 1.126915596  | 5.639521387  | 8.080128587 |                   | Lrrc8c       | leucine rich repeat   | protein binding ///    | full-length    |
| 10524169           | 1.134241686  | 1.327770778  | 0.153076663   | -6.088332218 | 0.619546808  | -3.669983154 | 5.088754071 |                   | Pole         | polymerase (DNA c     | nucleotide binding /   | full-length    |
| 10524460           | -0.042359731 | -7.274444876 | 0.147026509   | -6.326833914 | -1.682937912 | -1.977483509 | 8.085762867 | Cluster X         | Acacb        | acetyl-Coenzyme A     | ---                    | full-length    |
| 10524621           | 1.64443359   | 9.983793594  | 1.402923774   | 7.772469496  | 2.492736703  | 14.52549431  | 8.316851404 | Cluster VI        | Oasl2        | 2'-5' oligoadenylate  | 2'-5'-oligoadenylate   | full-length    |

| Affymetrix ID      | BS/Non Inf.  | LS/Non Inf.  | ReIN/Non Inf. | Average      | Cluster      | Gene         | Gene        | Gene Ontology (GC) | Transcript |                                             |             |                |
|--------------------|--------------|--------------|---------------|--------------|--------------|--------------|-------------|--------------------|------------|---------------------------------------------|-------------|----------------|
| Transcript Cluster | logFC        | B            | logFC         | B            | logFC        | B            | expression  | Number             | Symbol     | Title                                       | Description | Classification |
| 10524631           | 1.271140494  | -0.051774318 | 2.041081748   | 4.881689944  | 1.824955646  | 3.084365489  | 8.774205986 |                    | Oasl1      | 2'-5' oligoadenylate transferase activity   |             | full-length    |
| 10524698           | -2.604987434 | -0.190074515 | -1.911155236  | -1.861118206 | -2.565794715 | -0.666942502 | 5.713268427 |                    | Pla2g1b    | phospholipase A2, phospholipase A2 ε        |             | full-length    |
| 10525158           | 0.259411308  | -6.429619395 | 1.291466177   | 2.979334035  | 0.260451854  | -6.531576988 | 4.836230779 | Cluster V          | Oas1b      | 2'-5' oligoadenylate RNA binding /// ATF    |             | full-length    |
| 10525591           | 1.131437489  | -0.668457903 | 0.002403372   | -6.391741441 | 0.633610339  | -4.653466407 | 4.412665271 | Cluster III        | Kntc1      | kinetochore associat nucleus /// cytoplas   |             | full-length    |
| 10526277           | -0.567420247 | -6.278300017 | 0.309217192   | -6.085983944 | -1.314966798 | -3.358485219 | 8.797389512 | Cluster X          | Mlxip1     | MLX interacting pnc negative regulation     |             | full-length    |
| 10526459           | 1.117017361  | 9.325944193  | 0.401653873   | -0.627230216 | 1.118510335  | 8.909997343  | 6.120885384 |                    | Rasa4      | RAS p21 protein ac GTPase activator a       |             | full-length    |
| 10526783           | 1.39751038   | 1.903074128  | 0.252567471   | -5.793929465 | 1.636013896  | 3.120635891  | 4.399725004 |                    | BC055004   | cDNA sequence BC ---                        |             | full-length    |
| 10527012           | 1.20701124   | 4.307187051  | 0.10906417    | -6.148555619 | 1.169268777  | 3.548658099  | 7.039741206 | Cluster X          | Lfng       | LFNG O-fucosylpep ovarian follicle deve     |             | full-length    |
| 10527425           | -0.488662795 | -6.097090524 | -0.825587163  | -3.532697959 | -1.076411999 | -3.117384936 | 6.217143022 |                    | LOC280487  | pol polyprotein ---                         |             | partial        |
| 10527441           | 1.327024459  | 7.971451129  | 0.034531634   | -6.352750331 | 1.360513138  | 7.83070935   | 9.890346488 |                    | Arcp1b     | actin related proteir actin binding /// cyt |             | full-length    |
| 10527638           | 1.935186461  | 6.057292723  | 0.00074991    | -6.391784733 | 2.034933053  | 6.202042595  | 7.912935821 |                    | Alox5ap    | arachidonate 5-lipo leukotriene metabo      |             | full-length    |
| 10527940           | 1.607056921  | 9.894421419  | -0.140605516  | -5.806170852 | 1.39390809   | 7.778445317  | 6.259755396 |                    | Pftk1      | PFTAIRE protein ki nucleotide binding /     |             | full-length    |
| 10528102           | -0.838941192 | -1.718208883 | -0.108900387  | -6.251119721 | -1.42968     | 2.755096583  | 12.28757905 |                    | Crot       | carnitine O-octanoy peroxidase /// lipid    |             | full-length    |

| 10534667           | 1.711306691  | -5.047851074 | 0.255508404   | -6.33445769  | 3.460607591  | -1.161170389 | 6.658070615 | Serpine1              | serine (or cysteine) serine-type endope       | full-length                                |             |                |
|--------------------|--------------|--------------|---------------|--------------|--------------|--------------|-------------|-----------------------|-----------------------------------------------|--------------------------------------------|-------------|----------------|
| 10534909           | 1.367097702  | 11.01569862  | 0.297753313   | -2.934592916 | 1.512096737  | 11.80063875  | 6.816630375 | ---                   | ---                                           | partial                                    |             |                |
| 10534927           | 1.79706072   | 7.910552567  | -0.107863203  | -6.188827792 | 1.727961831  | 7.019979011  | 7.540054851 | Pilra                 | paired immunoglob receptor activity III       | full-length                                |             |                |
| 10534935           | 1.116518393  | -0.737309763 | 0.009959055   | -6.390931916 | 1.063662256  | -1.459862694 | 7.080462816 | Pilrb1                | paired immunoglob molecular_function          | full-length                                |             |                |
| 10535065           | 1.112697062  | 2.638786069  | 0.131079012   | -6.091150333 | 1.31405468   | 3.991355168  | 5.800175541 | Adap1                 | ArfGAP with dual P ---                        | full-length                                |             |                |
| 10535331           | -0.288362471 | -5.687197354 | -0.011275371  | -6.389109456 | -1.205415178 | 3.942936602  | 6.194322943 | Cluster X<br>Mmd2     | monocyte to macro receptor activity III       | full-length                                |             |                |
| 10535669           | -0.608036357 | -2.903560265 | -0.407347783  | -4.138117913 | -1.381125838 | 4.010612152  | 9.169198597 | Cluster X<br>Cyp3a41a | /// Cyp3a cytochrome P450, f monooxygenase ac | full-length                                |             |                |
| 10535683           | -0.632854784 | -2.475649941 | -0.413194425  | -3.987630172 | -1.419620522 | 4.578521391  | 9.095289311 | Cluster X<br>Cyp3a41a | /// Cyp3a cytochrome P450, f monooxygenase ac | full-length                                |             |                |
| 10535698           | -0.717689038 | -3.602766572 | -0.668484276  | -3.198004033 | -1.694113113 | 3.184049697  | 7.28328377  | Cluster X<br>Cyp3a44  | cytochrome P450, f molecular_function         | full-length                                |             |                |
| 10535704           | -0.474377149 | -3.845469686 | -0.316725946  | -4.689234303 | -1.302848347 | 4.342360616  | 12.01243072 | Cluster X<br>Cyp3a11  | cytochrome P450, f monooxygenase ac           | full-length                                |             |                |
| 10536908           | -0.987355742 | 4.198048371  | -0.233094982  | -4.916189967 | -1.200393353 | 5.954835806  | 7.309902618 | Tspan33               | tetraspanin 33 membrane /// integr            | full-length                                |             |                |
| 10537014           | -4.267138497 | 0.23996627   | -3.169580791  | -1.458238224 | -4.468419067 | 0.296300514  | 5.496844338 | Cpa2                  | carboxypeptidase A carboxypeptidase a         | full-length                                |             |                |
| 10537051           | -5.125330544 | 0.707598472  | -3.680291178  | -1.340797733 | -5.183349316 | 0.443975037  | 6.939805354 | Cpa1                  | carboxypeptidase A carboxypeptidase a         | full-length                                |             |                |
| 10537146           | 1.301238411  | -0.188406708 | -0.411773695  | -5.266625185 | 0.642846731  | -4.946503886 | 6.151940185 | Akr1b8                | aldo-keto reductase aldehyde reductase        | full-length                                |             |                |
| 10537318           | 0.805299667  | -3.050053128 | -0.04989012   | -6.369779401 | 1.410595253  | 1.105937084  | 7.940098086 | Trim24                | tripartite motif-cont: DNA binding /// pro    | full-length                                |             |                |
| 10537410           | 1.564634357  | 5.185007785  | 0.171468505   | -5.977959798 | 1.55295223   | 4.678547621  | 6.604190282 | Tbxas1                | thromboxane A syn prostaglandin biosy         | full-length                                |             |                |
| 10537627           | -2.497038611 | -1.033031987 | -1.631618451  | -3.108408462 | -2.599142403 | -1.038058382 | 5.773280136 | Cluster IX<br>Prss2   | protease, serine, 2 serine-type endope        | full-length                                |             |                |
| 10537634           | -2.131670239 | -2.310482206 | -1.809623313  | -2.604242905 | -2.350799642 | -1.903448881 | 4.452451047 | Try4                  | trypsin 4 molecular_function                  | full-length                                |             |                |
| 10537638           | -3.204437387 | -3.002784426 | -2.299598663  | -3.928435871 | -3.397947448 | -2.90033889  | 5.589625497 | Try10                 | trypsin 10 ---                                | full-length                                |             |                |
| 10537645           | -1.518424462 | -1.715262595 | -1.201381581  | -2.540331568 | -1.599057217 | -1.634943686 | 4.756948756 | EG386551              | predicted gene, EG ---                        | full-length                                |             |                |
| 10537650           | -2.628866431 | 2.045346863  | -1.910450754  | -0.236794553 | -2.590407041 | 1.510460278  | 5.796098436 | Prss1                 | /// EG43652 protease, serine, 1 ---           | full-length                                |             |                |
| 10538126           | 1.302693065  | 5.979621458  | 0.930313669   | -6.36846317  | 1.318089389  | 6.64835714   | 8.709321434 | Gimap4                | GTPase, IMAP fam nucleotide binding /         | full-length                                |             |                |
| 10538135           | 1.493718804  | 5.135227609  | 0.058407606   | -6.338087828 | 1.419631119  | 4.152539987  | 5.382631459 | Gimap7                | GTPase, IMAP fam ---                          | full-length                                |             |                |
| Affymetrix ID      | BS/Non Inf.  | LS/Non Inf.  | ReIN/Non Inf. | Average      | Cluster      | Gene         | Gene        | Gene Ontology (GC     | Transcript                                    |                                            |             |                |
| Transcript Cluster | logFC        | B            | logFC         | B            | logFC        | B            | expression  | Number                | Symbol                                        | Title                                      | Description | Classification |
| 10538150           | 0.891902187  | 4.426075359  | 0.064630248   | -6.230894838 | 1.009913526  | 5.384984887  | 9.403364187 |                       | Tmem176a                                      | transmembrane prc membrane /// integr      | full-length | full-length    |
| 10538187           | 1.757590118  | 1.924235445  | -0.059336325  | -6.369875724 | 2.2816099    | 4.254548426  | 5.536182891 |                       | Gpnmb                                         | glycoprotein (trans integrin binding III i | full-length | full-length    |
| 10538290           | 1.230180721  | 0.792611219  | 0.18076346    | -6.070752888 | 2.035729863  | 5.657787245  | 9.046165486 |                       | Snx10                                         | sorting nexin 10 protein binding III tr    | full-length | full-length    |
| 10538459           | -0.490805719 | -0.175182728 | -0.178178144  | -4.944530153 | -1.159475539 | 8.55508039   | 9.383372307 |                       | Aqp1                                          | aquaporin 1 transporter activity ,         | full-length | full-length    |
| 10538590           | 1.227329012  | 6.210918115  | 1.272159264   | 6.5307075251 | 2.133543007  | 12.31792119  | 8.770870552 |                       | ---                                           | ---                                        | partial     | partial        |
| 10538753           | 1.183873423  | 0.463386368  | 0.174701207   | -6.089758324 | 2.05540792   | 5.799515633  | 7.979313772 |                       | ---                                           | ---                                        | predicted   | predicted      |
| 10538791           | 1.348206365  | 0.482216258  | 0.000702213   | -6.391787102 | 1.613719912  | 1.826959842  | 4.748716527 |                       | Tnip3                                         | TNFAIP3 interactin ---                     | full-length | full-length    |
| 10538832           | 1.344891412  | 2.195535295  | -0.014109919  | -6.389553538 | 1.147378575  | 6.2897996827 | 7.095652374 |                       | Mad21                                         | MAD2 mitotic arres mitotic sister chrom    | full-length | full-length    |
| 10538868           | 1.867623301  | 5.382874151  | 0.120156856   | -6.240972118 | 1.558145676  | 2.994215302  | 6.736994596 |                       | ---                                           | ---                                        | partial     | partial        |
| 10538871           | 5.180824847  | 12.3400242   | -0.722970889  | -4.387550686 | 5.024076841  | 11.55768214  | 6.993904357 |                       | ---                                           | ---                                        | full-length | full-length    |
| 10538880           | 5.465986878  | 11.21222467  | 0.200778498   | -6.258348998 | 5.009546027  | 9.745014202  | 5.388562803 |                       | ---                                           | ---                                        | full-length | full-length    |
| 10538882           | 3.988322749  | 11.17756693  | -0.316665081  | -5.794057073 | 1.839722786  | 9.696808996  | 5.779626007 |                       | ---                                           | ---                                        | partial     | partial        |
| 10538887           | 1.626032565  | 3.617536967  | 0.281128253   | -5.638770491 | 1.383600257  | 1.558271453  | 5.188283669 |                       | ---                                           | ---                                        | partial     | partial        |
| 10538903           | 3.639446982  | 12.77814982  | 0.037286782   | -6.378155642 | 3.693791535  | 12.54637505  | 6.017442376 |                       | Igk                                           | /// Igk-V28 immunoglobulin kaj ---         | full-length | full-length    |
| 10538921           | 5.269700073  | 15.59175001  | -0.27031826   | -5.860634049 | 5.083949316  | 14.80356768  | 6.848396715 |                       | ---                                           | ---                                        | full-length | full-length    |
| 10538924           | 2.549728485  | 6.651355601  | 0.189171847   | -6.143014222 | 2.516680072  | 6.071233287  | 5.567036555 |                       | ---                                           | ---                                        | full-length | full-length    |
| 10538929           | 3.110082959  | 10.52112339  | 0.314539229   | -5.540449177 | 2.87837111   | 9.169452172  | 5.505147768 |                       | ---                                           | ---                                        | partial     | partial        |
| 10538936           | 1.19400107   | 0.82780394   | 0.198078472   | -5.982348674 | 1.513947047  | 2.79369738   | 5.022714438 |                       | ---                                           | ---                                        | partial     | partial        |
| 10538965           | -1.079913289 | -5.033685353 | -0.12306488   | -6.35808042  | -2.406340289 | -0.315421076 | 12.48429525 |                       | Fabp1                                         | fatty acid binding p1 chromatin binding /  | full-length | full-length    |
| 10538979           | 1.884386723  | 9.972051814  | -0.121350677  | -6.863792712 | 1.839722786  | 9.25627372   | 6.290456288 | Cluster I             | Cd8b1                                         | CD8 antigen, beta (protein binding III p   | full-length | full-length    |
| 10538993           | 2.435200159  | 13.96637883  | 0.175840779   | -5.611633089 | 2.683781324  | 14.72361739  | 6.704989056 | Cluster VI            | Cd8a                                          | CD8 antigen, alpha T cell mediated inm     | full-length | full-length    |
| 10539135           | 2.400092038  | 11.15146765  | 0.17657177    | -5.87748213  | 2.67392062   | 12.02407116  | 6.904038347 | Cluster VI            | Capg                                          | capping protein (ac actin binding III ext  | full-length | full-length    |
| 10539143           | -1.340049279 | 2.087067645  | -0.262969315  | -5.6677477   | -1.118071821 | -0.009589508 | 10.96438438 | Cluster X             | Retsat                                        | retinol saturase (all nuclear outer memt   | full-length | full-length    |
| 10539194           | -2.284685173 | -3.42404642  | -1.659263665  | -4.15818098  | -2.407475335 | -3.370867754 | 3.852161108 |                       | Reg2                                          | regenerating islet-d binding III sugar bir | full-length | full-length    |
| 10539200           | -4.303455637 | 1.600038646  | -3.009234867  | -0.866034307 | -4.353565683 | 1.329317359  | 5.49493167  |                       | Reg1                                          | regenerating islet-d binding III sugar bir | full-length | full-length    |
| 10539739           | 0.392861777  | -6.614629902 | 0.004629884   | -6.391696126 | 1.091395763  | -3.570269893 | 5.757768105 |                       | Asprv1                                        | aspartic peptidase, aspartic-type endo     | full-length | full-length    |
| 10539894           | -0.650547635 | -0.798878414 | -0.107371017  | -6.108277628 | -1.427635017 | 6.833139186  | 8.810296483 |                       | Mgl1                                          | monoglyceride lipa: catalytic activity III | full-length | full-length    |
| 10540531           | -0.488662795 | -6.097090524 | -0.82587163   | -3.532697959 | -1.076411999 | -3.117384936 | 6.217143022 |                       | LOC280487                                     | pol polyprotein ---                        | partial     | partial        |
| 10541129           | -0.488662795 | -6.097090524 | -0.82587163   | -3.532697959 | -1.076411999 | -3.117384936 | 6.217143022 |                       | 100043821                                     | /// 1000 predicted gene, 10( ---           | est         | est            |
| 10541301           | 0.961304696  | -2.19626656  | -0.132619405  | -6.252270477 | 1.730598394  | 2.64949218   | 7.714486184 |                       | Tuba8                                         | tubulin, alpha 8 nucleotide binding /      | full-length | full-length    |
| 10541307           | 1.467594006  | -0.214646847 | 2.673612272   | 5.932332763  | 2.212753053  | 3.406596545  | 8.88341955  | Cluster VII           | Usp18                                         | ubiquitin specific pe ubiquitin thiolester | full-length | full-length    |



| 10541555           | 2.499316029  | 10.30599854  | 0.155515002   | -6.067786757 | 2.647846219  | 10.56891475  | 7.575845904  |                   | Clec4a1            | C-type lectin domain receptor activity ///    | full-length |                |
|--------------------|--------------|--------------|---------------|--------------|--------------|--------------|--------------|-------------------|--------------------|-----------------------------------------------|-------------|----------------|
| 10541564           | 2.181030312  | 9.109689713  | 0.1864162     | -5.898599431 | 2.215501568  | 8.863505426  | 6.366280056  |                   | Clec4a3            | C-type lectin domain receptor activity ///    | full-length |                |
| 10541587           | 1.444384594  | 1.635042984  | -0.133708857  | -6.237945857 | 1.777871     | 3.365023917  | 5.251275153  | Cluster I         | Clec4a2            | C-type lectin domain binding /// sugar bir    | full-length |                |
| 10541605           | 3.189066798  | 15.81100189  | -0.078259397  | -6.261469908 | 3.51025235   | 16.55909848  | 7.65980052   | Cluster VI        | Clec4n             | C-type lectin domain binding /// sugar bir    | full-length |                |
| 10541614           | 1.109455582  | -5.10538896  | 0.041497601   | -6.388286718 | 2.278539289  | -1.159767644 | 4.781095005  |                   | Clec4d             | C-type lectin domain receptor activity ///    | full-length |                |
| 10542040           | 0.901244144  | 3.338800073  | 0.38183743    | -2.954799517 | 1.049267358  | 4.56925432   | 6.417619661  |                   | Parp11             | poly (ADP-ribose) ɸ NAD+ ADP-ribosylt         | full-length |                |
| 10542112           | -2.07804802  | 4.645552     | -0.203021174  | -6.090711373 | -2.180427736 | 4.756135804  | 7.1284899478 |                   | Clec2h             | C-type lectin domain receptor activity ///    | full-length |                |
| 10542120           | 1.120788223  | 4.433712224  | -0.091156361  | -6.189470102 | 1.052270773  | 3.338048578  | 5.933644672  |                   | Clec2i             | C-type lectin domain receptor activity ///    | full-length |                |
| 10542164           | 2.35175771   | 14.82393968  | 0.264471009   | -4.40401917  | 2.337216866  | 14.36964127  | 7.545243188  | Cluster VI        | Clec12a            | C-type lectin domain receptor activity ///    | full-length |                |
| 10542214           | 1.516059884  | 10.06961699  | -0.124661121  | -5.856932687 | 1.117500275  | 6.061358825  | 4.557232756  |                   | Klr1               | killer cell lectin-like receptor activity /// | full-length |                |
| 10542340           | 0.565619751  | -4.624754503 | -0.027730843  | -6.384159308 | 1.035620454  | -1.128372678 | 8.44670565   |                   | 8430419L09Rik      | RIKEN cDNA 8430 membrane /// integr           | full-length |                |
| 10542355           | 1.003654338  | 1.919552154  | -0.099480336  | -6.205455339 | 1.348751322  | 4.630097236  | 6.521056009  |                   | Emp1               | epithelial membrane membrane /// integr       | full-length |                |
| 10542691           | 1.025578115  | 2.207117181  | 0.098672132   | -6.205868442 | 0.893499504  | 0.490746467  | 6.072193196  |                   | Lrmp               | lymphoid-restricted cytoplasm /// endop       | full-length |                |
| 10542714           | -0.53528605  | -3.27098776  | -0.089568939  | -6.243781831 | -1.054075729 | 1.901768801  | 8.168015426  |                   | Lyrn5              | LYR motif containir ---                       | full-length |                |
| 10542738           | -0.890912817 | 1.703082563  | -0.139112812  | -5.95759342  | -1.14581209  | 3.91033086   | 7.204707642  |                   | Rassf8             | Ras association (R: signal transduction       | full-length |                |
| 10542880           | -1.375223082 | 4.267789579  | -0.338205364  | -4.786839349 | -0.66782887  | -2.632884327 | 9.964710237  |                   | 4833442J19Rik      | RIKEN cDNA 4833 cytoplasm /// protei          | full-length |                |
| 10542911           | 1.079647187  | 2.472015403  | 1.608997563   | 6.728283017  | 1.44022008   | 5.157220072  | 7.052902858  |                   | Samd9l             | sterile alpha motif c ---                     | partial     |                |
| 10542981           | 1.238308257  | 10.29823471  | 0.058069712   | -6.206008381 | 1.220068834  | 9.692568448  | 8.15037344   |                   | Gmfg               | glia maturation fact actin binding /// intr:  | full-length |                |
| 10543017           | -1.285060644 | 3.216926915  | -0.320377271  | -5.01097749  | -1.544289163 | 4.79244192   | 7.211177926  |                   | Pdk4               | pyruvate dehydrogɸ two-component ser          | full-length |                |
| 10543029           | -0.488662795 | -6.097090524 | -0.825587163  | -3.532697959 | -1.076411999 | -3.117384936 | 6.217143022  |                   | 100043821 /// 1000 | predicted gene, 1000 ---                      | est         |                |
| 10543239           | 1.307003194  | 7.071950037  | 0.315425551   | -4.008410902 | 1.056870174  | 4.245455478  | 6.238678328  |                   | Tcfec              | transcription factor DNA binding /// nuc      | full-length |                |
| 10543253           | -0.957457964 | 1.351978779  | -0.329854988  | -4.02396308  | -1.412002318 | 5.02157503   | 6.002353325  |                   | Wnt2               | wingless-related MI signal transducer a       | full-length |                |
| 10543859           | 1.06808906   | 3.594018587  | 0.093379958   | -6.191578884 | 0.780765571  | 0.106582191  | 8.015701646  |                   | Akr1b3             | aldo-keto reductase aldehyde reductase        | full-length |                |
| 10544133           | 0.860848168  | 5.293252462  | 0.984498908   | 6.705128829  | 1.207183487  | 8.777079634  | 9.529086139  |                   | Parp12             | poly (ADP-ribose) ɸ nucleic acid bindin       | full-length |                |
| 10544273           | 1.467855131  | -2.781289098 | 0.097065519   | -6.364533782 | 2.251458378  | 0.256643696  | 4.744979894  |                   | Clec5a             | C-type lectin domain binding /// sugar bir    | full-length |                |
| 10544326           | -5.217479134 | 0.318080899  | -3.889176018  | -1.374968279 | -5.415118037 | 0.293705121  | 5.941530118  |                   | 2210010C04Rik      | RIKEN cDNA 2210 ---                           | full-length |                |
| 10544333           | -4.878951629 | 0.972249168  | -3.47444622   | -1.202145618 | -4.722345848 | 0.300049573  | 6.493015577  |                   | 1810049H19Rik      | RIKEN cDNA 1810 ---                           | full-length |                |
| 10544342           | -1.38815449  | -1.72743561  | -0.728523783  | -4.411818003 | -1.35057967  | -2.234486931 | 4.815866665  |                   | Prss1 /// EG436523 | protease, serine, 1 molecular_function        | full-length |                |
| 10544588           | 1.731553396  | 4.693833281  | 0.230709479   | -5.837980586 | 1.850440197  | 5.008816977  | 5.495834857  |                   | Gimap3             | GTPase, IMAP fam nucleotide binding /         | full-length |                |
| 10544596           | 0.968846906  | 8.1034998    | 0.089860184   | -5.90203911  | 1.195967696  | 10.17072248  | 11.70921069  |                   | Tmem176b           | transmembrane prc nucleus /// membra          | full-length |                |
| 10544687           | -0.604483826 | -5.406329366 | -0.538575583  | -4.903868304 | -1.593278246 | 0.242569203  | 5.002401673  | Cluster X         | Cycc               | cytochrome c, som: iron ion binding /// s     | full-length |                |
| 10544891           | 1.025416337  | 4.637222806  | 0.009665117   | -6.388927238 | 1.22465331   | 6.209636014  | 6.968012409  | Cluster IV        | Nod1               | nucleotide-binding / nucleotide binding /     | full-length |                |
| 10544932           | -0.653466925 | -5.158829795 | -0.071934036  | -6.362366881 | -1.170351566 | -2.308200474 | 12.68889334  |                   | Inmt               | indolethylamine N-r cytoplasm /// methy       | full-length |                |
| Affymetrix ID      | BS/Non Inf.  | LS/Non Inf.  | ReIN/Non Inf. | Average      | Cluster      | Gene         | Gene         | Gene Ontology (GC | Transcript         |                                               |             |                |
| Transcript Cluster | logFC        | B            | logFC         | B            | logFC        | B            | expression   | Number            | Symbol             | Title                                         | Description | Classification |
| 10545009           | -0.617852807 | 0.277821372  | -0.171312774  | -5.420694359 | -1.038331881 | 5.201375074  | 6.597642054  |                   | Pigy               | phosphatidylinosito glycosylphosphatid        | full-length |                |
| 10545135           | 0.84733356   | 0.736241415  | 0.02925264    | -6.37386436  | 1.035456607  | 2.31267373   | 4.458958344  | Cluster III       | Il12b2             | interleukin 12 recep receptor activity ///    | full-length |                |
| 10545173           | 3.947470398  | 7.801508509  | -0.557541792  | -5.358604934 | 3.720881824  | 6.681115109  | 6.432806415  |                   | Igk                | immunoglobulin kaɸ ---                        | full-length |                |
| 10545175           | 3.620822916  | 8.241599792  | -0.308968869  | -5.965273281 | 3.281235567  | 6.659968092  | 6.231359876  |                   | Igk                | immunoglobulin kaɸ ---                        | full-length |                |
| 10545177           | 4.879720774  | 10.83500356  | 0.119157671   | -6.336102844 | 4.709271098  | 9.983840733  | 7.217148335  |                   | ---                | ---                                           | ---         | partial        |
| 10545180           | 1.074493296  | 0.877055952  | -0.297561424  | -5.942624841 | 1.349984679  | -1.550618893 | 4.450322808  |                   | ---                | ---                                           | ---         | partial        |
| 10545184           | 4.191205765  | 8.606774533  | -0.123172733  | -6.336381583 | 4.075828648  | 7.844903835  | 6.884540295  |                   | ---                | ---                                           | ---         | full-length    |
| 10545187           | 3.745234598  | 8.964745556  | -0.002711172  | -6.391755095 | 3.757547634  | 8.571050279  | 6.15812255   |                   | Gm1502             | gene model 1502, (---                         | ---         | full-length    |
| 10545190           | 1.771286472  | 0.467813679  | -0.442069489  | -5.562220678 | 2.09947135   | 1.714082791  | 3.456652557  |                   | ---                | ---                                           | ---         | partial        |
| 10545194           | 3.867655173  | 10.72826563  | 0.095303268   | -6.336092389 | 3.719663176  | 9.835091039  | 6.023863757  |                   | ---                | ---                                           | ---         | partial        |
| 10545196           | 4.160253065  | 10.36000369  | -0.363278562  | -5.763098015 | 3.976279146  | 9.391801095  | 7.375811418  |                   | Igk-C              | immunoglobulin kaɸ ---                        | ---         | full-length    |
| 10545198           | 4.551976092  | 10.88341315  | -0.39911229   | -5.702970414 | 4.540179008  | 10.42712775  | 7.399256472  |                   | EG667683           | predicted gene, EG ---                        | ---         | full-length    |
| 10545202           | 2.20524159   | 2.627054912  | -0.297440105  | -6.001326385 | 2.270085476  | 2.525371094  | 4.78550929   |                   | ---                | ---                                           | ---         | partial        |
| 10545205           | 2.555751768  | 7.184218082  | -0.299616722  | -5.732270449 | 2.92231295   | 8.32118      | 5.109260646  |                   | ---                | ---                                           | ---         | partial        |
| 10545208           | 4.683603411  | 12.78002111  | -0.269056119  | -5.976175647 | 4.45067736   | 11.75915313  | 7.10385586   |                   | ---                | ---                                           | ---         | partial        |
| 10545210           | 1.712350878  | 2.991919333  | 0.151545569   | -6.208487051 | 1.709491429  | 2.571970291  | 5.931006451  |                   | ---                | ---                                           | ---         | partial        |
| 10545212           | 1.863756755  | 4.62818496   | -0.33032819   | -5.452527459 | 1.982773015  | 4.892185849  | 4.683602111  |                   | ---                | ---                                           | ---         | partial        |
| 10545215           | 3.244106044  | 10.38276562  | 0.009459353   | -6.391051874 | 3.194680603  | 9.771288313  | 4.792748626  |                   | Igk /// Igk-V28    | immunoglobulin kaɸ ---                        | ---         | full-length    |
| 10545220           | 3.027746412  | 4.491449461  | 0.042847291   | -6.385506023 | 3.204628174  | 4.697114334  | 5.141271856  |                   | Igk                | immunoglobulin kaɸ ---                        | ---         | full-length    |
| 10545231           | 3.897572662  | 9.962044365  | -0.247288641  | -6.073699401 | 3.422563822  | 7.990392171  | 5.820163332  |                   | ---                | ---                                           | ---         | partial        |
| 10545233           | 1.092155898  | -2.803208422 | 0.15332421    | -6.270647235 | 1.619744565  | -0.075596745 | 4.946801393  |                   | ---                | ---                                           | ---         | partial        |

| 10545235           | 1.939304416  | 3.215096736  | 0.407074977   | -5.383556219 | 1.626172128  | 1.048579795  | 4.300834653       | ---         | ---                                             | ---                                         | partial     |                |
|--------------------|--------------|--------------|---------------|--------------|--------------|--------------|-------------------|-------------|-------------------------------------------------|---------------------------------------------|-------------|----------------|
| 10545237           | 2.288284333  | 1.719962738  | 0.053323282   | -6.381761579 | 1.961022612  | -0.099138606 | 3.962047183       | ---         | ---                                             | ---                                         | partial     |                |
| 10545239           | 4.170547499  | 5.23678536   | -0.281548291  | -6.230142657 | 3.683430676  | 3.459091894  | 5.823827454       | ---         | ---                                             | ---                                         | partial     |                |
| 10545242           | 1.509432217  | -0.047831693 | 0.188549028   | -6.196971991 | 1.434633628  | -0.830530102 | 4.436658207       | ---         | ---                                             | ---                                         | full-length |                |
| 10545247           | 3.880419068  | 7.368772861  | 0.00822767    | -6.391556488 | 3.840305739  | 6.81570426   | 6.248249711       | ---         | ---                                             | ---                                         | partial     |                |
| 10545249           | 1.638620534  | 2.99591071   | -0.031258189  | -6.383152041 | 1.841074001  | 3.824357974  | 3.952005986       | ---         | ---                                             | ---                                         | partial     |                |
| 10545436           | -1.020814267 | 6.472473968  | -0.308102506  | -3.24258128  | -1.141375519 | 7.33312383   | 7.592659834       | Elmod3      | ELMO/CED-12 don cytoskeleton /// pha            | full-length                                 |             |                |
| 10545479           | 2.138600799  | 11.17809679  | 0.058970851   | -6.316682596 | 2.272557253  | 11.48366456  | 8.999598868       | Cluster VI  | Tmsb10                                          | thymosin, beta 10 actin binding /// acti    | full-length |                |
| 10545588           | 1.801270758  | 8.571242381  | 0.111060397   | -6.152802051 | 2.172406423  | 10.36842405  | 6.76182383        | Hk2         | hexokinase 2 nucleotide binding /               | full-length                                 |             |                |
| 10545623           | 0.865563697  | -1.422367337 | -0.131906242  | -6.183498324 | 1.001157838  | -0.565173289 | 6.128726582       | Dok1        | docking protein 1 MAPKKK cascade /              | full-length                                 |             |                |
| 10545742           | -1.262267066 | 6.295356771  | -0.151973174  | -5.792769671 | -1.47294725  | 7.652241658  | 5.716105068       | Cd207       | CD207 antigen binding /// sugar bir             | full-length                                 |             |                |
| 10545771           | -1.015849432 | 1.948688093  | -0.14610234   | -6.003346222 | -0.945650414 | 0.869556877  | 6.269596666       | Cyp26b1     | cytochrome P450, f cell fate determinat         | full-length                                 |             |                |
| 10545874           | -1.574658459 | 3.619608938  | -0.142176525  | -6.17746049  | -2.143981708 | 6.639828486  | 7.877041429       | Cml5        | camello-like 5 gastrulation with mc             | full-length                                 |             |                |
| 10545877           | -1.086524626 | 1.891220449  | 0.185996876   | -5.854124247 | -0.70464353  | -2.199757932 | 6.35389523        | Cml4        | camello-like 4 gastrulation with mc             | full-length                                 |             |                |
| 10545891           | -0.978154133 | -1.635021031 | -0.023643906  | -6.386752383 | -1.843285697 | 3.939729123  | 8.452101051       | Cml1        | camello-like 1 gastrulation with mc             | full-length                                 |             |                |
| 10546010           | 1.635190038  | 8.144417129  | -0.068944804  | -6.286765593 | 1.684284427  | 8.059143678  | 6.707468188       | Arhgap25    | Rho GTPase activa molecular_function            | full-length                                 |             |                |
| 10546163           | 1.288021587  | 2.258804717  | -0.119583093  | -6.216734934 | 1.043585432  | -0.119013389 | 6.699560963       | Cluster III | Mcm2                                            | minichromosome rr nucleotide binding /      | full-length |                |
| 10546450           | 1.065107497  | -0.771954957 | 0.085123692   | -6.323751221 | 1.065189689  | -1.10545746  | 6.447167751       | Adamts9     | a disintegrin-like an endopeptidase acti        | full-length                                 |             |                |
| 10546685           | 1.433205157  | 12.14808823  | -0.150233284  | -5.220133995 | 2.160202195  | 16.57691024  | 7.646366775       | Eif4e3      | eukaryotic translati RNA binding /// trar       | full-length                                 |             |                |
| 10547177           | 1.743317735  | 10.51655172  | 0.033728367   | -6.358595718 | 1.53666394   | 8.585771749  | 7.000275126       | Rassf4      | Ras association (Ri:protein binding /// c       | full-length                                 |             |                |
| 10547641           | 1.178969056  | 6.847315807  | -0.135551767  | -5.790542253 | 1.353094389  | 8.021651358  | 5.643649959       | Slc2a3      | solute carrier family transporter activity ,    | full-length                                 |             |                |
| 10547657           | 1.158355624  | 1.025588383  | 0.089549919   | -6.296772474 | 1.012003694  | -0.553993921 | 7.087393376       | C3ar1       | complement compc signal transducer a            | full-length                                 |             |                |
| 10547664           | 2.488361682  | -1.858207141 | -0.1142466    | -6.374674161 | 3.589701885  | 0.91120557   | 4.753343963       | Cluster VI  | Clec4e                                          | C-type lectin domai binding /// sugar bir   | full-length |                |
| 10547769           | 1.113049516  | 6.395094568  | -0.043980596  | -6.323354762 | 1.196052103  | 6.792625377  | 8.685361709       | Cluster I   | Ptpn6                                           | protein tyrosine phc phosphotyrosine bi     | full-length |                |
| 10547943           | 1.454027551  | 2.297393466  | -0.093718068  | -6.306184191 | 0.919697143  | -2.088356342 | 6.472423361       | Cluster III | Ncapd2                                          | non-SMC condensi condensed chromo           | full-length |                |
| 10547976           | 0.993934567  | 3.160914864  | 0.201633614   | -5.45445162  | 1.513566669  | 7.438343214  | 8.050597381       | Cluster IV  | Tapbp1                                          | TAP binding proteir endoplasmic reticul     | full-length |                |
| 10547985           | 1.016971327  | 2.270108072  | -0.083415872  | -6.254448167 | 0.933686289  | 1.041672949  | 4.92446595        | Cd27        | CD27 antigen receptor activity /// t            | full-length                                 |             |                |
| 10548105           | 0.884921887  | 2.260098887  | -0.091799574  | -6.173910438 | 1.152650781  | 4.659582653  | 8.904855359       | Ccnd2       | cyclin D2 protein binding /// n                 | full-length                                 |             |                |
| 10548333           | 1.081289891  | 1.478771999  | 0.058296918   | -6.340841512 | 1.324606035  | 3.145379991  | 4.718214576       | Cd69        | CD69 antigen binding /// sugar bir              | full-length                                 |             |                |
| 10548345           | 1.113955594  | 9.336334446  | 0.231152774   | -3.836939526 | 0.88228811   | 6.177127447  | 4.607908797       | Klrk1       | killer cell lectin-like stimulatory C-type I    | full-length                                 |             |                |
| 10548375           | 1.933835241  | 10.19085679  | -0.287587648  | -4.756791274 | 2.229314335  | 11.46596917  | 6.920833395       | Cluster VI  | Clec7a                                          | C-type lectin domai opsonin binding /// :   | full-length |                |
| 10548385           | 0.329061223  | -6.25747062  | -0.015525362  | -6.38939143  | 1.112665967  | -0.519086245 | 3.836599121       | Cluster IV  | Olr1                                            | oxidized low densit receptor activity /// l | full-length |                |
| 10548409           | 1.209790687  | 2.98417177   | 0.133889943   | -6.10780664  | 0.922783042  | -0.029248186 | 4.454207527       | Klrc1       | killer cell lectin-like receptor activity /// r | full-length                                 |             |                |
| 10548552           | 1.704290842  | 5.400526595  | 0.254376487   | -5.616474318 | 1.692015875  | 4.895178356  | 6.089857864       | Klra2       | killer cell lectin-like receptor activity /// l | full-length                                 |             |                |
| 10548563           | 0.203174376  | -6.786084379 | -0.023791213  | -6.384932638 | 1.002515371  | -0.568825628 | 10.90138827       | Ptp4a1      | protein tyrosine phc phosphoprotein phc         | full-length                                 |             |                |
| 10548892           | 2.376679407  | 13.06583452  | -0.129994987  | -5.995776758 | 2.571755739  | 13.60155074  | 8.391525411       | Arhgdib     | Rho, GDP dissoci Rho GDP-dissociat              | full-length                                 |             |                |
| 10548931           | -0.928498126 | 1.814184681  | 0.13000611    | -6.032653398 | -1.102888231 | 3.179813467  | 5.992259881       | Slc15a5     | solute carrier family transporter activity ,    | full-length                                 |             |                |
| 10548978           | -3.253879463 | -2.716360147 | -0.069520509  | -6.388883525 | -5.712868154 | 1.631655564  | 9.441043394       | Slco1a1     | solute carrier organ transporter activity ,     | full-length                                 |             |                |
| 10549079           | -0.327349507 | -2.842953112 | -0.138947076  | -5.372483723 | -1.112731197 | 8.733601432  | 11.10601146       | Gys2        | glycogen synthase catalytic activity /// ζ      | full-length                                 |             |                |
| 10549842           | -0.56813921  | -4.512811354 | -0.11814695   | -6.248933813 | -1.01888337  | -1.093179714 | 5.358407993       | Zfp667      | zinc finger protein ε nucleic acid bindinç      | full-length                                 |             |                |
| 10550102           | 1.272753686  | 2.731013103  | -0.012670289  | -6.389554025 | 0.938080243  | -0.540920962 | 6.371335232       | Cluster III | Lig1                                            | ligase I, DNA, ATP- nucleotide binding /    | full-length |                |
| 10550332           | 1.456915823  | 10.57295684  | -0.276091475  | -3.78048223  | 1.600253118  | 11.27102857  | 6.554242928       | Slc1a5      | solute carrier family transport /// dicarbo     | full-length                                 |             |                |
| 10550509           | 1.40668621   | 4.023298817  | 0.034538332   | -6.374443301 | 1.776642398  | 6.206743046  | 6.613428384       | Cluster I   | Pglyrp1                                         | peptidoglycan reco; cytokine activity /// j | full-length |                |
| Affymetrix ID      | BS/Non Inf.  | LS/Non Inf.  | ReIN/Non Inf. | Average      | Cluster      | Gene         | Gene Ontology (GC | Transcript  |                                                 |                                             |             |                |
| Transcript Cluster | logFC        | B            | logFC         | B            | logFC        | B            | expression        | Number      | Symbol                                          | Title                                       | Description | Classification |
| 10550574           | 1.011821926  | 0.986606585  | 0.166845321   | -5.973699243 | 0.648851727  | -2.91261629  | 8.536770809       |             | Dmpk                                            | dystrophia myotonii nucleotide binding /    | full-length |                |
| 10550877           | 1.154006695  | 6.61333711   | -0.054370879  | -6.290974995 | 1.314843607  | 7.697330321  | 6.257940699       |             | Kcnn4                                           | potassium intermec ion channel activity     | full-length |                |
| 10550906           | 1.423959823  | 2.284566113  | -0.16407417   | -6.12276362  | 1.996032658  | 5.508024134  | 6.352374772       |             | Plaur                                           | plasminogen activa receptor activity /// r  | full-length |                |
| 10551009           | 2.152247786  | 11.29932053  | 0.06618156    | -6.06618156  | 2.327133813  | 11.81417332  | 8.970687919       | Cluster VI  | Tmsb10                                          | thymosin, beta 10 actin binding /// acti    | full-length |                |
| 10551185           | 1.525739803  | 9.086396447  | -0.037132841  | -6.350530888 | 1.521563027  | 8.621544912  | 7.811191209       | Cluster I   | Tgfb1                                           | transforming growt skeletal developme       | full-length |                |
| 10551197           | 1.995448437  | -1.745835255 | -0.000722319  | -6.391789872 | 1.265578975  | -4.70000345  | 6.721180265       |             | Cyp2b10                                         | cytochrome P450, f monooxygenase ac         | full-length |                |
| 10551218           | 5.094542089  | 9.700679465  | 0.004543228   | -6.391729327 | 4.788458311  | 8.533791914  | 6.912699648       |             | Cyp2b9                                          | cytochrome P450, f monooxygenase ac         | full-length |                |
| 10551226           | 1.338785124  | -1.004945906 | -0.272812694  | -5.984675181 | 2.229569033  | 3.468696504  | 11.505311954      |             | Cyp2a4 /// Cyp2a5                               | cytochrome P450, f monooxygenase ac         | full-length |                |
| 10551282           | 0.984463127  | -0.341392145 | -0.18194532   | -5.999130654 | 1.560037462  | 3.783532525  | 11.23443618       |             | LOC100047728                                    | similar to Cytochr ---                      | predicted   |                |
| 10551531           | -3.482734292 | 1.798098074  | -2.474934989  | -0.597595526 | -3.384344021 | 1.134666603  | 6.484586453       |             | Syncn                                           | syncollin exocytosis /// memt               | full-length |                |
| 10551666           | 1.063651251  | 3.704322634  | -0.091060417  | -6.195746577 | 1.151246088  | 4.145266506  | 6.094338234       | Cluster III | Map4k1                                          | mitogen-activated ç nucleotide binding /    | full-length |                |

|          |              |              |              |              |              |              |             |               |                                                     |                                                     |             |
|----------|--------------|--------------|--------------|--------------|--------------|--------------|-------------|---------------|-----------------------------------------------------|-----------------------------------------------------|-------------|
| 10551836 | -1.079398091 | 1.737468547  | -0.136579557 | -6.101425793 | -1.374376285 | 3.839536377  | 6.174343215 | Cox7a1        | cytochrome c oxidase cytochrome-c oxidase           | full-length                                         |             |
| 10551883 | 2.082306122  | 11.63513967  | 0.096046518  | -6.167482684 | 1.867245844  | 9.908789997  | 8.116751475 | Tyrobp        | TYRO protein tyrosine kinase binding protein        | full-length                                         |             |
| 10552406 | 3.605802648  | 16.36720527  | -0.028292351 | -6.376967424 | 3.835114939  | 16.72594633  | 7.137538368 | Nkg7          | natural killer cell group 7 membrane protein        | full-length                                         |             |
| 10552546 | -2.132805047 | 0.290142955  | -1.223982521 | -2.983733431 | -2.867613478 | 2.797506766  | 5.835915508 | Klk1b5        | Klk1 family class B member 5                        | full-length                                         |             |
| 10552587 | -0.693389413 | -1.609011899 | -0.363548055 | -4.36158272  | -1.005078555 | 1.273315084  | 5.152680447 | Klk1b21       | Klk1 family class B member 21                       | full-length                                         |             |
| 10552613 | -1.075721965 | -4.656093775 | -0.090825569 | -6.369504832 | -2.766459413 | 1.896174721  | 6.697389197 | Klk1b4        | Klk1 family class B member 4                        | full-length                                         |             |
| 10552672 | -0.569360621 | -0.202201149 | -0.027033339 | -6.364260018 | -1.063185731 | 5.782636617  | 9.587106689 | Cluster X     | 0610012D14Rik                                       | full-length                                         |             |
| 10552697 | 1.147404179  | 4.083421498  | -0.066036355 | -6.295995792 | 1.508764369  | 6.735004348  | 6.218809944 | Napsa         | napsin A aspartic protease                          | full-length                                         |             |
| 10553274 | 4.231593123  | 13.79603473  | 1.644106897  | 3.267471496  | 4.826383706  | 14.95683786  | 10.89707688 | Cluster VIII  | Saa2                                                | serum amyloid A 2 lipid transporter                 | full-length |
| 10553324 | 1.44739001   | 10.40683442  | 0.214947019  | -4.70780574  | 1.344638146  | 9.100266006  | 7.837450989 | Tmem86a       | transmembrane protein 86a                           | full-length                                         |             |
| 10553521 | -0.651089912 | -2.780971932 | 0.071244537  | -6.317421422 | -1.12518984  | 1.380540731  | 8.112004398 | Gas2          | growth arrest specific 2 cytoplasmic protein        | full-length                                         |             |
| 10554269 | 0.989542952  | 2.409342316  | -0.182421479 | -5.708627637 | 1.440710909  | 6.078915615  | 9.287571596 | Abhd2         | abhydrolase domain containing 2                     | full-length                                         |             |
| 10554445 | 2.126659625  | 1.305808035  | -0.183271077 | -6.266894329 | 1.48416195   | -2.100941116 | 5.587346463 | Prc1          | protein regulator of cytokinesis 1                  | full-length                                         |             |
| 10554574 | 1.473720448  | 6.217605425  | 0.152003768  | -5.952613654 | 1.42197675   | 5.383846925  | 8.031510374 | Tmc6s1        | transmembrane protein 6 subfamily 1                 | full-length                                         |             |
| 10554667 | 1.995925785  | 9.722000893  | -0.094785121 | -6.218695357 | 1.700754938  | 7.400410652  | 5.529158116 | Tmc3          | transmembrane protein 3                             | full-length                                         |             |
| 10554752 | -1.521891648 | 13.59095004  | -0.111325866 | -5.639038417 | -1.565327165 | 13.52693787  | 8.212983056 | Cluster IX    | Nox4                                                | NADPH oxidase 4                                     | full-length |
| 10554789 | 1.477290767  | 7.004389845  | 0.097815822  | -6.180534884 | 1.531562769  | 6.990565117  | 11.65407239 | Ctsc          | cathepsin C                                         | full-length                                         |             |
| 10554938 | -1.427258619 | 7.568391889  | -0.717048873 | -0.851460429 | -0.732731188 | 0.109889385  | 7.236328263 | Rab30         | RAB30, member R of the Rab family                   | full-length                                         |             |
| 10555297 | 1.020711768  | -0.690698792 | -0.012246979 | -6.390219234 | 0.41184225   | -5.818791331 | 5.231612306 | Kcne3         | potassium voltage-gated channel accessory protein 3 | full-length                                         |             |
| 10555389 | 1.422158403  | 8.165149409  | -0.144747098 | -5.800543804 | 1.251518363  | 6.247067877  | 9.020985141 | Ucp2          | uncoupling protein 2                                | full-length                                         |             |
| 10555695 | 1.185301859  | -0.195874552 | -0.151502415 | -6.194600494 | 0.66700294   | -4.377226874 | 7.942038136 | Rrm1          | ribonucleotide reductase subunit 1                  | full-length                                         |             |
| 10556076 | -0.082431454 | -7.128672087 | 0.006296502  | -6.390919007 | -1.216702095 | 4.271852027  | 7.480336181 | Olfml1        | olfactomedin-like 1                                 | full-length                                         |             |
| 10556113 | 1.870826501  | 1.923754905  | 0.024549358  | -6.388475562 | 2.156432708  | 2.979553764  | 10.31657437 | Rbm3          | RNA binding motif protein 3                         | full-length                                         |             |
| 10556266 | 0.976488054  | -0.831164458 | -0.207286714 | -5.932782303 | 1.233556491  | 0.890500461  | 6.618218245 | Wee1          | WEE1 homolog (S kinase)                             | full-length                                         |             |
| 10556297 | 1.422324293  | 0.480335542  | 0.027788845  | -6.38635303  | 1.756048809  | 2.136278222  | 6.971825707 | Adm           | adrenomedullin                                      | full-length                                         |             |
| 10556463 | -0.533290905 | -4.460906832 | 0.061729221  | -6.346171116 | -1.002127656 | -0.610427559 | 7.729134391 | Arntl         | aryl hydrocarbon receptor nuclear translocator 1    | full-length                                         |             |
| 10556491 | 1.367068804  | 4.757496088  | -0.110235936 | -6.181007357 | 1.294420151  | 3.743401298  | 6.035223049 | Far1          | fatty acyl-CoA synthetase 1                         | full-length                                         |             |
| 10556718 | -0.94454829  | 5.222880281  | -0.18888513  | -5.098173173 | -1.060518968 | 6.106292125  | 4.198809029 | Cluster X     | Acsm2                                               | acyl-CoA synthetase 2                               | full-length |
| 10557156 | 1.596533156  | 4.900610636  | -0.231587245 | -5.71687089  | 1.23407194   | 1.772270399  | 6.111169413 | Plk1          | polo-like kinase 1                                  | full-length                                         |             |
| 10557177 | 1.456905662  | 3.603600124  | 0.229483816  | -5.762277206 | 1.194176888  | 1.181546842  | 6.865538424 | Prkcb         | protein kinase C, beta                              | full-length                                         |             |
| 10557300 | -0.451514055 | -6.883706377 | 0.200074203  | -6.313992841 | -1.698664839 | -3.369918685 | 10.16455178 | Aqp8          | aquaporin 8                                         | full-length                                         |             |
| 10557342 | 1.709032774  | 6.46979585   | -0.066305321 | -6.324941081 | 2.084829622  | 8.354575214  | 5.500078996 | Il21r         | interleukin 21 receptor                             | full-length                                         |             |
| 10557591 | 2.264311061  | 6.947032734  | 0.20401139   | -6.0096209   | 2.373930848  | 7.063120002  | 8.022686726 | Cluster VI    | Itgal                                               | integrin alpha L                                    | full-length |
| 10557862 | 2.902894071  | 8.77960763   | -0.017250545 | -6.389448449 | 3.707068077  | 11.2660564   | 6.611231517 | Cluster VI    | Itgam                                               | integrin alpha M                                    | full-length |
| 10557895 | 1.988131165  | 5.96098942   | -0.228548999 | -5.873503408 | 1.755887389  | 4.15183735   | 5.605603664 | Cluster I     | Itgax                                               | integrin alpha X                                    | full-length |
| 10558159 | -1.734631321 | -0.308581976 | -0.918384221 | -3.698450692 | -1.584966198 | -1.391899799 | 7.52125894  | Dmbt1         | deleted in malignant brain tumor 1                  | full-length                                         |             |
| 10558769 | 1.102944728  | 7.420735129  | 0.293431153  | -3.455853204 | 1.534709747  | 1.756988801  | 9.193924249 | Ifitm1        | interferon induced transmembrane protein 1          | full-length                                         |             |
| 10558961 | 0.649858755  | -2.72707557  | -0.136054216 | -6.119287897 | 1.253185665  | 2.562208838  | 9.546806135 | Tspan4        | tetraspanin 4                                       | full-length                                         |             |
| 10559207 | 2.629630822  | 12.50528627  | -0.302338275 | -4.929534021 | 2.443469467  | 11.21230507  | 7.780481748 | Cluster I     | Lsp1                                                | lymphocyte specific protein 1                       | full-length |
| 10559446 | 1.519439627  | 6.594175256  | -0.349609597 | -4.34155494  | 1.842959652  | 8.414895062  | 7.118440949 | Cluster I     | Lilrb3                                              | leukocyte immunoglobulin-like receptor B3           | full-length |
| 10559454 | 1.954483762  | 9.770911013  | -0.047270742 | -6.346073036 | 1.885174336  | 8.910691498  | 7.616675208 | Pira6         | PirA family class 6 member 6                        | full-length                                         |             |
| 10559467 | 2.26042485   | 10.20783018  | 0.018338144  | -6.386237448 | 2.405262108  | 10.5224867   | 7.167265355 | Lilrb3        | leukocyte immunoglobulin-like receptor B3           | full-length                                         |             |
| 10559478 | 0.962402552  | -2.541971057 | 0.082366752  | -6.342825483 | 1.038680081  | -2.303792674 | 4.641826028 | Pira11        | PirA family class 11 member 11                      | full-length                                         |             |
| 10559486 | 2.074623104  | 10.24418575  | 0.157433037  | -5.920343057 | 2.298638164  | 11.04398681  | 6.891761136 | Lair1         | leukocyte-associated retinol binding protein 1      | full-length                                         |             |
| 10560131 | -1.210852231 | -2.234522053 | -0.00930185  | -6.391358341 | -2.007000473 | -2.007000473 | 11.11210444 | 2810007J24Rik | RIKEN cDNA 2810 transferase activity                | full-length                                         |             |
| 10560242 | 1.553544974  | 2.05719126   | -0.24522134  | -5.916881493 | 2.450593209  | 6.600151566  | 6.340460568 | C5ar1         | complement component 5 receptor 1                   | full-length                                         |             |
| 10561104 | 1.090845657  | 2.145105046  | 0.065273864  | -6.320118777 | 1.159256242  | 2.366831714  | 7.993029339 | Axl           | AXL receptor tyrosine kinase                        | full-length                                         |             |
| 10561212 | -1.359348463 | 2.282731428  | -0.121882688 | -6.227609699 | -1.756596636 | 4.59635977   | 6.869244968 | Cluster IX    | Ltbp4                                               | latent transforming growth factor binding protein 4 | full-length |
| 10562096 | -0.676901261 | -0.031191382 | -0.074230389 | -6.240564116 | -1.112077297 | 4.564742589  | 8.790791689 | Tmem147       | transmembrane protein 147                           | full-length                                         |             |
| 10562169 | 0.752259566  | -2.266763285 | 0.052136435  | -6.356989548 | 1.427399868  | 3.094905248  | 12.07359576 | Hamp          | hepcidin antimicrobial hormone                      | full-length                                         |             |
| 10562192 | 2.431143474  | 14.04423238  | -0.072748699 | -6.249054763 | 2.378242355  | 13.38892215  | 8.511915673 | Fxyd5         | FXYD domain-containing protein 5                    | full-length                                         |             |
| 10562563 | 0.910785281  | 4.067807565  | 0.021390963  | -6.375785285 | 1.009882233  | 4.782340146  | 6.152697254 | Cluster III   | Ccne1                                               | cyclin E1                                           | full-length |
| 10562637 | 2.746447753  | 7.836217016  | -0.063204719 | -6.361932852 | 2.419523639  | 5.93823877   | 6.150578498 | Ccnb1         | cyclin B1                                           | full-length                                         |             |

| Affymetrix ID      | BS/Non Inf. | LS/Non Inf. | ReIN/Non Inf. | Average     | Cluster    | Gene        | Gene        | Gene Ontology (GC) | Transcript |                                              |             |                |
|--------------------|-------------|-------------|---------------|-------------|------------|-------------|-------------|--------------------|------------|----------------------------------------------|-------------|----------------|
| Transcript Cluster | logFC       | B           | logFC         | B           | logFC      | B           | expression  | Number             | Symbol     | Title                                        | Description | Classification |
| 10562720           | 2.046875368 | 9.740517083 | 0.46950103    | -3.22013828 | 2.30809334 | 10.74657569 | 8.050192967 |                    | Siglece    | sialic acid binding lectin receptor activity |             | full-length    |

|          |              |              |              |              |              |              |             |              |                    |                        |                          |                      |             |
|----------|--------------|--------------|--------------|--------------|--------------|--------------|-------------|--------------|--------------------|------------------------|--------------------------|----------------------|-------------|
| 10563178 | 1.173121541  | 8.287286764  | -0.060305149 | -6.232503048 | 1.16029006   | 7.724832677  | 6.558505195 | Cluster I    | Cd37               | CD37 antigen           | positive regulation c    | full-length          |             |
| 10563441 | 1.772961735  | 8.852920249  | 0.010213921  | -6.389561909 | 2.183331887  | 10.90463498  | 7.849129923 |              | Emp3               | epithelial membran     | membrane /// integri     | full-length          |             |
| 10563597 | 4.007478807  | 11.80545596  | 0.847655806  | -2.73308582  | 5.205372499  | 14.50838653  | 9.567851952 | Cluster VIII | Saa3               | serum amyloid A 3      | lipid transporter act    | full-length          |             |
| 10563602 | 0.383073325  | -3.86605996  | 0.196204279  | -5.343552436 | 1.255272175  | 6.284731258  | 11.45169954 |              | Saa4               | serum amyloid A 4      | lipid transporter act    | full-length          |             |
| 10563611 | 3.799359435  | 8.139212188  | 1.884045371  | 1.156400555  | 4.635045588  | 10.06601669  | 9.443243247 | Cluster VIII | Saa1 /// Saa2      | serum amyloid A 1      | lipid transporter act    | full-length          |             |
| 10563766 | 1.188174559  | 1.214464212  | 0.378376891  | -4.891419197 | 0.946957862  | -1.15373998  | 5.648022165 |              | EG639116           | predicted gene, EG --- |                          | predicted            |             |
| 10564631 | 1.064097142  | 2.206766916  | 0.109202709  | -6.180683712 | 1.647755488  | 6.557961765  | 7.442117782 |              | Slco3a1            | solute carrier organ   | transporter activity ,   | full-length          |             |
| 10565018 | 2.042997062  | 13.48671116  | 0.023514217  | -6.372399432 | 2.191080163  | 13.9193052   | 8.155987333 |              | Iqgap1             | IQ motif containing    | GTPase activator a       | full-length          |             |
| 10565598 | -0.488662795 | -6.097090524 | -0.825587163 | -3.532697959 | -1.076411999 | -3.117384936 | 6.217143022 |              | 100043821 /// 1000 | predicted gene, 10(--- | est                      |                      |             |
| 10565609 | 0.666624543  | -4.701266542 | 0.401022074  | -5.367815831 | -1.401322398 | -0.106790866 | 9.432551632 |              | Thrsp              | thyroid hormone re:    | nucleus                  | full-length          |             |
| 10565727 | 0.096649126  | -7.263946294 | 0.135581025  | -6.360989645 | 2.287224356  | -1.877639108 | 8.210278955 |              | Tsku               | tsukushin              | protein binding /// e    | full-length          |             |
| 10565815 | -0.79017821  | 2.605171744  | -0.043826816 | -6.324367663 | -1.012834563 | 4.856357004  | 7.460872958 |              | ---                | ---                    | ---                      | partial              |             |
| 10565910 | -1.058232268 | 0.78108637   | -0.09980445  | -6.257923222 | -0.587393088 | -3.898346854 | 7.035716077 |              | Plekhb1            | pleckstrin homolog     | Golgi membrane ///       | full-length          |             |
| 10565958 | 1.181014202  | 7.953311355  | -0.049832356 | -6.289956736 | 1.568587761  | 10.89447534  | 6.13666484  |              | P2ry6              | pyrimidinergic recej   | signal transducer a      | full-length          |             |
| 10565994 | 1.703157686  | -2.276138611 | 0.777455738  | -5.035495268 | 1.343662017  | -4.000121975 | 6.265680221 |              | Art2b              | ADP-ribosyltransfer    | NAD(P)+-protein-ar       | full-length          |             |
| 10566050 | 2.039599425  | 16.2300615   | 0.507635237  | 1.139335763  | 2.098140795  | 16.20395601  | 8.29913843  |              | Il18bp             | interleukin 18 bindi   | extracellular region     | full-length          |             |
| 10566205 | -1.02628318  | -3.33211446  | -1.022875925 | -2.585612338 | -1.537555349 | -0.718804323 | 9.290583912 |              | Dub2a              | deubiquitinating en;   | ubiquitin thioleste      | full-length          |             |
| 10566326 | 1.27047279   | 4.335815651  | 1.525684589  | 6.338196343  | 1.445346288  | 5.344975495  | 8.234077767 |              | Trim12             | tripartite motif-cont  | protein binding /// ir   | full-length          |             |
| 10566333 | 0.925378923  | 5.322879603  | 1.047902123  | 6.634719537  | 1.124458778  | 7.122328659  | 7.643176504 |              | 9230105E10Rik ///  | RIKEN cDNA 9230 zinc   | ion binding /// r        | full-length          |             |
| 10566346 | 1.164459081  | -0.086963458 | 1.260653278  | 1.183493086  | 1.341955519  | 0.845040549  | 6.354233761 |              | 9230105E10Rik      | RIKEN cDNA 9230 zinc   | ion binding /// r        | full-length          |             |
| 10566358 | 1.672719508  | 9.953264368  | 1.573616131  | 8.675752337  | 1.956450413  | 11.40013736  | 8.880907825 |              | Trim30             | tripartite motif-cont  | DNA binding /// pro      | full-length          |             |
| 10566366 | 0.862117914  | -1.086470961 | 1.848450782  | 6.510871502  | 1.499344747  | 3.826346219  | 6.954639752 |              | Al451617           | expressed sequenc      | zinc ion binding /// r   | full-length          |             |
| 10566571 | 2.015762239  | 8.177826088  | 1.177736938  | 2.653028045  | 2.394134934  | 9.78497485   | 7.150740907 |              | ---                | ---                    | ---                      | partial              |             |
| 10566574 | 2.573775802  | 14.78012787  | 1.58528115   | 8.527865073  | 3.002805171  | 16.20088858  | 8.837129981 |              | Gvin1              | GTPase, very large     | nucleotide binding /     | full-length          |             |
| 10566578 | 2.320623234  | 11.95029597  | 1.411432527  | 6.091811646  | 2.689087005  | 13.29741414  | 7.907652068 |              | ---                | ---                    | ---                      | partial              |             |
| 10566583 | 1.962889178  | 10.10431478  | 0.544400366  | -1.971505706 | 2.239474659  | 11.25430137  | 6.811766162 |              | EG668139           | predicted gene, EG --- | est                      |                      |             |
| 10566585 | 2.216831725  | 12.61924638  | 1.19873079   | 5.493181613  | 2.700311575  | 14.55843689  | 6.465554543 |              | ---                | ---                    | ---                      | partial              |             |
| 10566934 | 0.927594691  | -0.464337125 | -0.167316469 | -6.027507861 | 1.0269406    | 0.075466825  | 8.595759076 |              | Lyce1              | lymphatic vessel er    | receptor activity /// i  | full-length          |             |
| 10567355 | 0.723097802  | -1.958132564 | 0.21275853   | -5.740641734 | 1.191278829  | -2.079137564 | 5.31099488  |              | Gprc5b             | G protein-coupled r    | signal transducer a      | full-length          |             |
| 10567366 | -2.756771512 | -1.481551733 | -1.645878884 | -3.795966311 | -2.761773629 | -1.783168099 | 4.698983407 |              | Gp2                | glycoprotein 2 (zmr    | extracellular region     | full-length          |             |
| 10567394 | -1.466515558 | 5.457974812  | -0.143275415 | -6.044682836 | -1.969461384 | 8.438314365  | 6.107730106 |              | ---                | ---                    | ---                      | partial              |             |
| 10567580 | 2.334282223  | 11.10716057  | 0.189490087  | -5.775230493 | 2.268863418  | 10.34270665  | 8.155888604 |              | Igsf6              | immunoglobulin suj     | membrane /// integri     | full-length          |             |
| 10567825 | 1.697079536  | 12.12660444  | -0.082721721 | -6.120708313 | 2.029589093  | 13.84965263  | 6.373111917 |              | Lgat               | linker for activation  | immunological sync       | full-length          |             |
| 10568024 | 2.936625877  | 16.99416919  | -0.081623491 | -6.186863521 | 3.026322846  | 17.00194338  | 7.666034216 |              | Cluster VI         | Coro1a                 | coronin, actin bindi     | immunological sync   | full-length |
| 10568050 | 0.964348837  | 7.280129971  | -0.093918315 | -5.922078594 | 1.130249648  | 8.711626208  | 10.57895066 |              | Aldoa              | aldolase A, fructos    | catalytic activity /// f | full-length          |             |
| 10568115 | 0.727738642  | 2.835747443  | -0.143170365 | -5.556668118 | 1.286146669  | 8.827448242  | 8.519490787 |              | Mvp                | major vault protein    | cytoplasm /// ribonu     | full-length          |             |
| 10568150 | 1.31910702   | 3.477877554  | 0.323563955  | -4.989977385 | 1.003227782  | 0.367157237  | 5.361638752 |              | Kif22              | kinesin family mem     | nucleotide binding /     | full-length          |             |
| 10568165 | -3.579254408 | 1.394986327  | -2.71492353  | -0.414696414 | -3.468951207 | 0.719661611  | 5.119558762 |              | 1810010M01Rik      | RIKEN cDNA 1810        | sugar binding /// ex     | full-length          |             |
| 10568174 | 1.057084388  | 3.615748265  | -0.139492564 | -5.942634714 | 1.410682199  | 6.40422423   | 5.941662575 |              | Cluster IV         | Spn                    | sialophorin              | response to proteoz  | full-length |
| 10568202 | 1.202205635  | 3.25106577   | 0.073495508  | -6.299249768 | 1.26703111   | 3.398794236  | 6.39487364  |              | Cluster III        | Sep-01                 | septin 1                 | nucleotide binding / | full-length |
| 10568355 | 0.81762988   | 1.04699209   | -0.088090936 | -6.20768866  | 1.248278447  | 5.053513414  | 5.689599012 |              | Pycard             | PYD and CARD do        | cysteine-type endoj      | full-length          |             |
| 10568502 | -1.377804224 | -1.367528615 | -0.907143772 | -3.280314894 | -1.323270595 | -1.989328488 | 4.58460422  |              | Cuzd1              | CUB and zona pelli     | protein binding /// c    | full-length          |             |
| 10568534 | -0.488662795 | -6.097090524 | -0.825587163 | -3.532697959 | -1.076411999 | -3.117384936 | 6.217143022 |              | 100043821 /// 1000 | predicted gene, 10(--- | est                      |                      |             |
| 10568714 | 2.305490808  | 6.229562359  | 0.103140737  | -6.306677397 | 1.917213703  | 3.75452049   | 6.288998887 |              | Mki67              | antigen identified b   | chromosome, centr        | full-length          |             |
| 10568731 | -1.157134337 | -2.549366519 | -1.79257992  | 1.564200412  | -0.389999925 | -6.644170383 | 4.061080795 |              | ---                | ---                    | ---                      | ---                  |             |
| 10569020 | 2.295357295  | 7.338453665  | 0.199108027  | -6.01271929  | 2.225064418  | 6.546045977  | 6.391430144 |              | Ifitm6             | interferon induced     | t integral to membra     | full-length          |             |
| 10569102 | 1.630031385  | 8.700835618  | 1.618719345  | 8.188775075  | 2.121904933  | 11.41614346  | 9.761425048 |              | Cluster VI         | Ilr7                   | interferon regulator     | DNA binding /// trar | full-length |
| 10569168 | -0.27608831  | -6.649786554 | 0.097613414  | -6.31164991  | -1.134287641 | -1.038163273 | 9.713838521 |              | Slc25a22           | solute carrier family  | transporter activity ,   | full-length          |             |
| 10569504 | 1.320110788  | 5.201303899  | -0.058829001 | -6.321300138 | 1.190022039  | 3.644137964  | 5.49246579  |              | Tnfrsf23           | tumor necrosis fact    | receptor activity /// j  | full-length          |             |
| 10569646 | 1.315356324  | -1.72792574  | 0.03072577   | -6.387199047 | 0.778407193  | -4.978915833 | 8.65021619  |              | Cluster III        | Ccnd1                  | cyclin D1                | cyclin-dependent pi  | full-length |
| 10569656 | 0.948502913  | 4.987700059  | 0.107697182  | -5.963490092 | 1.017441076  | 5.348458066  | 6.858076398 |              | Tpcn2              | two pore segment c     | ion channel activity     | full-length          |             |
| 10569707 | 1.097125844  | 7.604693653  | -0.172097962 | -5.177398293 | 1.041336698  | 6.566480025  | 8.098896359 |              | Myadm              | myeloid-associated     | membrane /// integri     | full-length          |             |
| 10569823 | -0.500664845 | -5.333765492 | 0.143744417  | -6.212716093 | -1.310729239 | 0.379730915  | 6.002014582 |              | C330021F23Rik      | RIKEN cDNA C330 ---    |                          | full-length          |             |
| 10569877 | 1.363851524  | -1.534171492 | -0.134805541 | -6.30583988  | 1.877324041  | 0.871720013  | 5.427011323 |              | 1810033B17Rik      | RIKEN cDNA 1810 ---    |                          | full-length          |             |
| 10569890 | 1.229114054  | 9.690567487  | 0.421153749  | -0.757421906 | 1.393553842  | 10.76156788  | 8.186660791 |              | Aida               | axin interactor, dor   | protein binding /// rr   | full-length          |             |
| 10570201 | 1.415147689  | 4.184122329  | 0.202489355  | -5.81103585  | 2.159936578  | 8.591274577  | 7.103869424 |              | Atp11a             | ATPase, class VI, t    | nucleotide binding /     | full-length          |             |

| Affymetrix ID      | BS/Non Inf.  | LS/Non Inf.  | ReIN/Non Inf. | Average      | Cluster      | Gene         | Gene        | Gene Ontology (GC | Transcript         |                                             |             |                |
|--------------------|--------------|--------------|---------------|--------------|--------------|--------------|-------------|-------------------|--------------------|---------------------------------------------|-------------|----------------|
| Transcript Cluster | logFC        | B            | logFC         | B            | logFC        | B            | expression  | Number            | Symbol             | Title                                       | Description | Classification |
| 10570434           | 1.288892481  | 8.700405724  | 0.010303883   | -6.387608637 | 1.701830707  | 11.58616462  | 8.009019487 |                   | Ifitm1             | interferon induced t somitogenesis /// ar   | full-length |                |
| 10570516           | 1.055426457  | 2.531663204  | -0.034572065  | -6.368529115 | 1.393865867  | 5.1101362    | 5.345884845 |                   | Kbtbd11            | kelch repeat and B' protein binding         | full-length |                |
| 10570741           | 0.82074073   | -4.755559576 | -0.279885532  | -6.053187767 | 1.197062342  | -2.999170265 | 5.698761457 | Cluster IV        | Defb1              | defensin beta 1 extracellular region        | full-length |                |
| 10571353           | -0.786875151 | -1.800032056 | -0.046168078  | -6.36342326  | -1.108540972 | 0.760941782  | 6.44495606  |                   | 6430573F11Rik      | RIKEN cDNA 6430: metabolic process /        | full-length |                |
| 10571467           | -0.851288191 | -2.934068636 | -0.107692629  | -6.297124774 | -1.0050332   | -2.085521085 | 5.135357867 |                   | Pdgfrl             | platelet-derived gro extracellular region   | full-length |                |
| 10571560           | -0.820605476 | -0.861132884 | -0.20605097   | -5.762673116 | -1.045951751 | 0.940980823  | 4.766269446 |                   | Mtnr1a             | melatonin receptor signal transducer a      | full-length |                |
| 10571653           | 1.484903434  | 11.12355499  | -0.067440408  | -6.191838441 | 1.647874316  | 11.94917416  | 11.25135463 |                   | Actg1              | actin, gamma, cyto nucleotide binding /     | full-length |                |
| 10571657           | -0.898437649 | 3.774642629  | -0.217125767  | -4.957173292 | -1.572468215 | 9.770228294  | 12.26330583 |                   | Acsl1              | acyl-CoA synthetas magnesium ion bin        | full-length |                |
| 10571870           | 2.1660213    | 10.56469354  | -0.000878644  | -6.391776221 | 1.944828899  | 8.852722552  | 7.816133841 |                   | Hmgb2              | high mobility group DNA binding /// nuc     | full-length |                |
| 10571891           | -1.011472727 | 2.048971034  | -0.136889676  | -6.039866342 | -1.16043877  | 3.061795481  | 9.276019657 |                   | Aadat              | aminoadipate amin catalytic activity /// t  | full-length |                |
| 10571984           | 1.206350869  | 6.613270595  | 2.061132524   | 11.42846226  | 1.216813538  | 6.281791409  | 6.93792394  |                   | Ddx60              | DEAD (Asp-Glu-Ala)---                       | full-length |                |
| 10572130           | 1.272495458  | 7.969791284  | -0.315345704  | -6.314687905 | 1.562378322  | 9.969947953  | 8.882638026 | Cluster I         | Lpl                | lipoprotein lipase catalytic activity /// l | full-length |                |
| 10572445           | 1.927095013  | 13.75689922  | 0.083724618   | -6.108390781 | 1.840766804  | 12.81223116  | 6.176396948 |                   | Lrrc25             | leucine rich repeat molecular_function      | full-length |                |
| 10572747           | 1.361457919  | 6.914622087  | -0.018454617  | -6.382935596 | 1.35718919   | 6.44694994   | 9.158382093 |                   | Tpm4               | tropomyosin 4 podosome /// actin            | full-length |                |
| 10572897           | 3.036385549  | 10.56187205  | 0.181931781   | -6.077909688 | 3.771312644  | 12.73340048  | 9.916885271 |                   | Hmxo1              | heme oxygenase (c heme oxygenase (c         | full-length |                |
| 10572906           | 1.40915828   | 1.353655958  | 0.094768544   | -6.314687073 | 1.305920204  | 0.266896996  | 6.735054999 | Cluster III       | Mcm5               | minichromosome rr nucleotide binding /      | full-length |                |
| 10573261           | 2.023993028  | 6.493652228  | 0.049562639   | -6.364965465 | 1.782584126  | 4.63361828   | 6.487735301 |                   | Asf1b              | ASF1 anti-silencing chromatin /// nucleu    | full-length |                |
| 10573747           | 1.072119104  | 3.038392793  | 0.118845734   | -6.104001343 | 1.011865488  | 2.044673282  | 6.637704975 |                   | Adcy7              | adenylate cyclase 7 magnesium ion bin       | full-length |                |
| 10573865           | 0.598241802  | -6.186061261 | 0.814571297   | -4.537040434 | 1.471048151  | -2.678610145 | 11.35434024 |                   | LOC437762          | hypothetical gene L ---                     | full-length |                |
| 10573939           | 1.669668792  | 7.661391044  | 0.20954169    | -5.581158576 | 1.486922888  | 5.891162953  | 6.762544118 |                   | Lpcat2             | lysophosphatidylch calcium ion binding      | full-length |                |
| 10574023           | 3.230663828  | 5.277827034  | 1.56538796    | -1.002613442 | 4.399314522  | 8.412765748  | 11.06260202 |                   | Mt2                | metallothionein 2 cellular zinc ion hor     | full-length |                |
| 10574027           | 2.177833598  | 1.877305594  | 0.937955367   | -3.574091649 | 3.273161254  | 5.83903369   | 11.47718211 |                   | Mt1                | metallothionein 1 copper ion binding ,      | full-length |                |
| 10574098           | 1.405643455  | 5.120012094  | 1.027576558   | 2.266919856  | 1.598108131  | 6.144212318  | 7.536384407 |                   | ---                | ---                                         | predicted   |                |
| 10574102           | 1.131814074  | 4.396099723  | 0.976087739   | 3.191274672  | 1.399812503  | 6.359044025  | 8.077742135 |                   | ---                | ---                                         | predicted   |                |
| 10574104           | 1.623911316  | 7.431082697  | 1.206804933   | 4.326201891  | 1.825704851  | 8.372477306  | 7.179411789 |                   | Nlr5               | NLR family, CARD ---                        | partial     |                |
| 10574133           | 0.808193905  | -0.12334535  | 0.631819291   | -1.387184456 | 1.090495398  | 2.356378041  | 6.643898551 |                   | ---                | ---                                         | predicted   |                |
| 10574135           | 1.597083603  | 4.158338918  | 1.190551163   | 1.658516751  | 1.922102983  | 5.797794345  | 6.264940751 |                   | ---                | ---                                         | predicted   |                |
| 10574137           | 1.353420921  | 5.541135783  | 0.998203614   | 2.693046624  | 1.513226287  | 6.383392515  | 7.34922217  |                   | ---                | ---                                         | predicted   |                |
| 10574139           | 1.326458199  | 4.961181163  | 0.830920005   | 0.786073881  | 1.356789862  | 4.789746181  | 6.678549157 |                   | ---                | ---                                         | predicted   |                |
| 10574141           | 1.218715219  | 5.653507891  | 0.766855346   | 1.353592975  | 1.182768309  | 4.892365848  | 7.082576626 |                   | ---                | ---                                         | predicted   |                |
| 10574143           | 1.156878964  | 1.694146524  | 0.552884607   | -3.163188726 | 1.206426522  | 1.721163796  | 5.737667443 |                   | ---                | ---                                         | predicted   |                |
| 10574145           | 1.695629671  | 4.603911797  | 1.033255947   | 0.290666544  | 1.796824611  | 4.82386263   | 6.577996629 |                   | ---                | ---                                         | ---         |                |
| 10574149           | 1.953811894  | 7.796369561  | 1.474958954   | 4.781401289  | 2.166848881  | 8.581612859  | 8.43450932  |                   | ---                | ---                                         | predicted   |                |
| 10574151           | 1.145269654  | 1.79117031   | 0.770040946   | -1.009889521 | 1.386446307  | 3.3564062    | 7.164818717 |                   | ---                | ---                                         | ---         |                |
| 10574157           | 1.518835677  | 6.859488335  | 1.199876876   | 4.440605206  | 1.740651185  | 8.017124287  | 7.861920593 |                   | ---                | ---                                         | ---         |                |
| 10574159           | 1.394070924  | 5.488908497  | 1.165908873   | 3.833393085  | 1.771116714  | 7.816273045  | 7.806328846 |                   | ---                | ---                                         | predicted   |                |
| 10574161           | 0.825130519  | 3.172802917  | 0.623777015   | 0.979911837  | 1.034954352  | 5.223927408  | 7.872669586 |                   | ---                | ---                                         | predicted   |                |
| 10574163           | 1.219108958  | 4.78896865   | 0.755728311   | 0.568989492  | 1.385664549  | 5.801148202  | 6.334122499 |                   | ---                | ---                                         | partial     |                |
| 10574350           | -0.806377793 | 1.175036659  | -0.064162026  | -6.288003502 | -1.305911366 | 5.871005272  | 7.111573176 |                   | Mmp15              | matrix metallopepti metalloendopeptid       | full-length |                |
| 10574432           | -0.488662795 | -6.097090524 | -0.825587163  | -3.532697959 | -1.076411999 | -3.117384936 | 6.217143022 |                   | 100043821 /// 1000 | predicted gene, 10( ---                     | predicted   |                |
| 10574434           | -0.488662795 | -6.097090524 | -0.825587163  | -3.532697959 | -1.076411999 | -3.117384936 | 6.217143022 |                   | 100043821 /// 1000 | predicted gene, 10( ---                     | est         |                |
| 10574471           | 1.112040662  | 4.882303381  | -0.03435892   | -6.359697017 | 0.975437572  | 3.049439322  | 8.386159746 |                   | Cmtm3              | CKLF-like MARVEL cytokine activity /// t    | full-length |                |
| 10574488           | -0.861275668 | -0.109750158 | -0.191176235  | -5.803602389 | -1.276013733 | 3.347399122  | 6.663429754 |                   | 4833426J09Rik      | RIKEN cDNA 4833: magnesium ion bin          | full-length |                |
| 10574498           | -0.7737782   | -1.941909866 | -0.36267449   | -4.846787778 | -1.65748767  | 4.898805968  | 10.97506209 |                   | Ces6               | carboxylesterase 6 ---                      | full-length |                |
| 10574511           | -0.917963404 | -1.253970713 | -0.336821874  | -5.223667478 | -1.237247507 | 1.011362901  | 4.828648789 |                   | BC015286           | cDNA sequence BC( ---                       | partial     |                |
| 10574524           | -1.172249139 | 0.312160015  | -0.444225429  | -4.671334223 | -1.742967382 | 3.892166602  | 8.040426254 |                   | Ces2               | carboxylesterase 2 ---                      | full-length |                |
| 10574532           | -0.95006372  | -0.189546979 | -0.208400083  | -5.942559926 | -1.425663356 | 2.14745542   | 10.55367563 |                   | Ces2               | carboxylesterase 2 ---                      | full-length |                |
| 10574545           | -0.90557559  | 2.127845151  | -0.009239098  | -6.389703303 | -1.575531229 | 7.824288339  | 10.93279401 |                   | Ces5               | carboxylesterase 5 ---                      | full-length |                |
| 10574607           | -1.158294348 | 2.20157457   | 0.018261248   | -6.386733625 | -1.57375082  | 5.064847167  | 11.99954944 |                   | EG13909            | predicted gene, EG carboxylesterase a       | full-length |                |
| 10574617           | -1.834191613 | 5.237764299  | -0.355856574  | -5.16438228  | -2.135989514 | 6.54126211   | 6.242408521 |                   | BC026374           | cDNA sequence BC( carboxylesterase a        | full-length |                |
| 10574976           | 1.000579753  | 3.35146952   | 0.020942815   | -6.380665243 | 0.691225186  | -0.587720547 | 7.407612094 |                   | Pla2g15            | phospholipase A2, phosphatidylcholin        | full-length |                |
| 10574985           | 0.895817867  | 2.791983347  | 0.253398291   | -4.783041984 | 1.344614463  | 6.858705973  | 5.175531643 |                   | Slc7a6             | solute carrier family plasma membrane       | full-length |                |
| 10575052           | -0.680392424 | -3.791011825 | -0.044788904  | -6.372486717 | -1.393293487 | 1.394009511  | 8.404381915 |                   | Cdh1               | cadherin 1 trophectodermal ce               | full-length |                |
| 10575153           | -0.748635678 | 1.407162055  | -0.113659168  | -6.0039872   | -1.120603407 | 5.25221234   | 11.05118996 | Cluster X         | Cyb5b              | cytochrome b5 type iron ion binding /// r   | full-length |                |

| 10575249           | -0.827200011 | 1.126185817  | -0.150209376   | -5.873764582 | -1.193859429 | 4.521324665  | 6.607033861 |            | Txn14b             | thioredoxin-like 4B nucleus /// spliceos     | full-length |                |
|--------------------|--------------|--------------|----------------|--------------|--------------|--------------|-------------|------------|--------------------|----------------------------------------------|-------------|----------------|
| 10575685           | -1.529206522 | -1.807930684 | -0.145557737   | -6.3175522   | -3.476618305 | 5.77224222   | 10.69239738 |            | Nudt7              | nudix (nucleoside d magnesium ion bin        | full-length |                |
| 10575799           | 1.477968765  | 3.270583137  | -0.026214354   | -6.383920973 | 1.618546016  | 3.8299015    | 6.765863962 | Cluster I  | Plcg2              | phospholipase C, g follicular B cell diffe   | full-length |                |
| 10575833           | -0.585077318 | -0.048675578 | -0.0271899     | -6.364478337 | -1.210969997 | 7.169440538  | 10.94267882 | Cluster X  | Hsd17b2            | hydroxysteroid (17- catalytic activity /// € | full-length |                |
| 10576034           | 2.145282996  | 12.66443503  | 0.037610855    | -6.352698196 | 2.494087842  | 14.05168067  | 7.82006381  | Cluster VI | Irf8               | interferon regulator DNA binding /// trar    | full-length |                |
| 10576332           | 0.29651147   | -5.708458601 | -0.26411089    | -5.14887051  | 1.15831078   | 3.137749244  | 4.689227248 |            | Tubb3              | tubulin, beta 3 nucleotide binding /         | full-length |                |
| 10576774           | -2.026572183 | -0.612608243 | 0.058255737    | -6.382605896 | -2.254701884 | -0.036315876 | 10.23722857 |            | Clec4g             | C-type lectin domain binding /// sugar bir   | full-length |                |
| 10576883           | 1.445690953  | 0.899673806  | -0.369975509   | -5.443662341 | 1.127321275  | -1.587692279 | 4.813250483 |            | Shcbp1             | Shc SH2-domain bi protein binding /// S      | full-length |                |
| 10577190           | 1.375382906  | 2.66326166   | -0.144045693   | -6.151902225 | 1.190870074  | 0.850201802  | 7.359067777 |            | Rasa3              | RAS p21 protein ac GTPase activator a        | full-length |                |
| 10577315           | 1.341175455  | 5.591540818  | 0.187664054    | -5.6831357   | 2.414387567  | 12.08294063  | 6.001770719 | Cluster II | Angpt2             | angiopoietin 2 angiogenesis /// rec          | full-length |                |
| 10577641           | -0.87177066  | -3.072014003 | 0.146976607    | -6.231639326 | -1.178893724 | -1.211726616 | 8.670180353 |            | 1810011010Rik      | RIKEN cDNA 1810 apoptosis                    | full-length |                |
| 10577792           | 1.654872847  | 11.60916901  | 0.204477768    | -4.938230095 | 1.758395223  | 11.91699234  | 7.15828819  |            | Plekha2            | pleckstrin homolog; phosphatidylinosito      | full-length |                |
| 10578222           | -0.470616275 | -5.382448721 | -0.293487924   | -5.609147228 | -1.222282078 | 0.174799384  | 7.796455455 |            | Dlc1               | deleted in liver can; neural tube closure    | full-length |                |
| 10578264           | 1.640294037  | 11.3524916   | 0.130249039    | -5.776948067 | 1.892815275  | 12.64741578  | 8.633579254 | Cluster I  | Msr1               | macrophage scavenger receptor activity /// : | full-length |                |
| 10578352           | 1.066303587  | 4.224903579  | 0.107239801    | -6.096187866 | 1.378102438  | 6.685645578  | 12.39986284 |            | Fgl1               | fibrinogen-like prote receptor binding ///   | full-length |                |
| 10578539           | 1.230504724  | 2.700802037  | -0.042114779   | -6.365553167 | 1.126221196  | 1.418055363  | 8.035927094 |            | Slc25a4            | solute carrier family transporter activity , | full-length |                |
| 10578690           | 1.055850881  | -0.218172613 | 0.128460762    | -6.213770044 | 0.612179691  | -4.244010128 | 4.799082738 |            | Neil3              | nei like 3 (E. coli) DNA binding /// dan     | full-length |                |
| Affymetrix ID      | BS/Non Inf.  | LS/Non Inf.  | RelNF/Non Inf. | Average      | Cluster      | Gene         | Gene        | Gene       | Gene               | Gene                                         | Transcript  |                |
| Transcript Cluster | logFC        | B            | logFC          | B            | logFC        | B            | expression  | Number     | Symbol             | Title                                        | Description | Classification |
| 10579199           | -0.750218242 | -2.578682891 | -0.033584736   | -6.378501512 | -1.160097033 | 0.610910369  | 7.968760882 |            | Slc25a42           | solute carrier family binding /// mitochon   | full-length |                |
| 10579347           | 2.679637727  | 15.98076274  | 0.211547155    | -5.122072756 | 2.639602338  | 15.44635457  | 10.40421138 | Cluster VI | Irf3               | interferon gamma ii lysosome /// disulfic    | full-length |                |
| 10579636           | 1.201350066  | 0.803016747  | 0.060442383    | -6.353231916 | 1.147061348  | 0.015198705  | 5.402361328 |            | Cyp4f18            | cytochrome P450, 1monooxygenase ac           | full-length |                |
| 10579649           | -1.464044998 | 8.590614004  | -0.223768842   | -5.04255229  | -1.74453969  | 10.24371234  | 5.408798782 |            | Cib3               | calcium and integrin molecular_function      | full-length |                |
| 10579659           | 1.23702252   | 5.694064821  | 0.173979203    | -5.663833666 | 0.986115368  | 2.80713826   | 9.376018221 |            | Hmgn2              | high mobility group chromatin /// DNA b      | full-length |                |
| 10579812           | 0.926110624  | 3.3013489897 | -0.104846457   | -6.093290438 | 1.266082515  | 6.027715515  | 7.390672217 |            | Ednr2              | endothelin receptor patterning of blood      | full-length |                |
| 10580033           | 1.20634148   | 3.404173199  | 0.075020409    | -6.29326352  | 1.075030286  | 1.81732981   | 8.99859634  |            | Cd97               | CD97 antigen signal transducer a             | full-length |                |
| 10580457           | 0.733519296  | 0.218247683  | 0.228778529    | -5.200343868 | 1.22761383   | 5.080994497  | 8.691842419 |            | N4bp1              | NEDD4 binding pro nucleus                    | full-length |                |
| 10580649           | -1.539150481 | 5.885981728  | -0.018761119   | -6.385805794 | -2.080518735 | 8.964902167  | 10.119366   |            | Es22               | esterase 22 carboxylesterase a               | full-length |                |
| 10580663           | -1.073190656 | -1.144066149 | -0.007423292   | -6.391323154 | -1.351097767 | 0.500043682  | 11.33425658 |            | AU018778           | expressed sequenc carboxylesterase a         | full-length |                |
| 10580875           | -0.580841635 | 1.078252732  | -0.277353799   | -3.476290254 | -1.076809651 | 7.314405415  | 8.091762939 |            | Gtl3               | gene trap locus 3 ---                        | full-length |                |
| 10581009           | -0.488662795 | -6.097090524 | -0.825587163   | -3.532697959 | -1.076411999 | -3.117384936 | 6.217143022 |            | 100043821 /// 1000 | predicted gene, 10( ---                      | est         |                |
| 10581355           | -4.542293816 | -0.495573668 | -3.525998106   | -1.723803267 | -4.658286126 | -0.624479278 | 6.929591845 |            | Ctrl               | chymotrypsin-like protein binding /// p      | full-length |                |
| 10581378           | 1.493759605  | 11.3400529   | 0.232306775    | -4.302426109 | 1.61370749   | 11.84456263  | 8.846517091 |            | Psmb10             | proteasome (proso) endopeptidase acti        | full-length |                |
| 10581479           | 1.085082778  | -1.390837056 | 0.206308541    | -6.067875962 | 1.244635495  | -0.601934228 | 5.694608326 |            | Smpd3              | sphingomyelin phospho; Golgi cis cisterna // | full-length |                |
| 10581538           | 1.494678423  | -2.871036386 | -0.219909863   | -6.261570901 | 2.299000145  | 0.157159792  | 7.064339982 |            | Nqo1               | NAD(P)H dehydrogenase NAD(P)H dehydrog       | full-length |                |
| 10581813           | 2.237409527  | 12.97783522  | 0.920882873    | 3.157367477  | 2.550343665  | 14.13122199  | 7.21010936  |            | Mkl1               | mixed lineage kinase protein kinase activ    | full-length |                |
| 10581882           | -5.004382372 | 0.674203021  | -3.970793859   | -0.647615756 | -5.612058432 | 1.389447816  | 7.502971004 | Cluster IX | Ctrb1              | chymotrypsinogen I serine-type endope        | full-length |                |
| 10582162           | 1.295477601  | 6.024127081  | -0.20239225    | -5.455354505 | 1.308548533  | 5.70982988   | 7.437038421 |            | Cotl1              | coactosin-like 1 (Di actin binding /// pro   | full-length |                |
| 10582275           | 0.68315794   | 1.362832746  | 0.081367546    | -6.152528269 | 1.085227754  | 5.873296254  | 6.896369202 |            | Slc7a5             | solute carrier family cytoplasm /// plasm    | full-length |                |
| 10582303           | 2.285554665  | 17.11726658  | -0.019714681   | -6.371322717 | 2.271416644  | 16.71428779  | 8.843436086 |            | Cyba               | cytochrome b-245, iron ion binding /// c     | full-length |                |
| 10582337           | 1.020307857  | 1.65438095   | 0.262316316    | -5.286635379 | 1.004171351  | 1.117039186  | 6.36809758  |            | Fam38a             | family with sequenc ---                      | partial     |                |
| 10582464           | 1.199615142  | -3.390475435 | 1.755185887    | -0.025388451 | 1.413787051  | -2.619564211 | 5.005265228 |            | ---                | ---                                          | est         |                |
| 10582626           | -0.676574658 | 1.172751357  | -0.228418314   | -4.740456248 | -1.002560291 | 4.867458052  | 7.493270746 |            | Abcb10             | ATP-binding cassette nucleotide binding /    | full-length |                |
| 10582862           | 1.222470381  | 2.24033804   | -0.267919357   | -5.474982597 | 1.655054482  | 5.067971887  | 6.311637224 |            | Sp140              | Sp140 nuclear body zinc ion binding /// r    | full-length |                |
| 10582868           | 0.804972257  | 5.516120857  | 0.181768883    | 0.181768883  | 1.03585264   | 7.995200852  | 6.321503972 |            | ---                | ---                                          | partial     |                |
| 10582874           | 1.356642952  | 7.36001555   | 0.234880094    | -4.994067087 | 1.407440196  | 7.355674074  | 5.476680342 |            | ---                | ---                                          | partial     |                |
| 10582983           | -0.488662795 | -6.097090524 | -0.825587163   | -3.532697959 | -1.076411999 | -3.117384936 | 6.217143022 |            | LOC280487          | pol polyprotein ---                          | partial     |                |
| 10582985           | 1.83640695   | 8.497859179  | 0.265975955    | -5.185358347 | 1.99554366   | 9.049086232  | 6.589406381 |            | Casp1              | caspase 1 response to hypoxia                | full-length |                |
| 10582997           | 1.46415044   | 5.130505833  | -0.011850775   | -6.389482726 | 1.75225527   | 6.745887094  | 6.092347803 |            | Casp4              | caspase 4, apoptos cysteine-type endo        | full-length |                |
| 10583044           | 0.203809229  | -6.754921395 | 0.002935269    | -6.391680363 | 1.240774804  | 1.663332639  | 5.622822041 |            | Mmp13              | matrix metalloprotein metalloendopeptid      | full-length |                |
| 10583056           | 0.530989199  | -2.407817915 | 0.145362625    | -5.888961031 | 1.43600108   | 6.809808106  | 5.511252115 |            | Mmp12              | matrix metalloprotein metalloendopeptid      | full-length |                |
| 10583100           | 1.247746673  | -5.001454639 | 0.05705446     | -6.38625962  | 1.904813075  | -3.096011019 | 4.376221325 |            | Mmp8               | matrix metalloprotein metalloendopeptid      | full-length |                |
| 10583112           | 1.258192923  | -1.520867517 | 0.263929517    | -6.012121355 | 0.890001159  | -4.036879745 | 5.324367202 |            | Mmp27              | matrix metalloprotein ---                    | partial     |                |
| 10583519           | 1.851682626  | 3.89999952   | -0.098407512   | -6.31272847  | 2.39341564   | 6.341427781  | 7.677904151 | Cluster VI | Icam1              | intercellular adhesion immunological sync    | full-length |                |
| 10583669           | 2.151568257  | 12.70687032  | 0.128441279    | -5.949412856 | 2.207489168  | 12.60412595  | 7.791693047 |            | AB124611           | cDNA sequence AE membrane /// integ          | full-length |                |
| 10583870           | 1.330915761  | -4.440336891 | 0.013796504    | -6.391420524 | 2.681825352  | 0.037288177  | 6.258045271 |            | Bmpr               | BMP-binding endot protein binding /// e      | full-length |                |

| 10584271           | -0.589085755 | -5.281902793 | 0.019358883   | -6.38933924  | -1.462556703 | 0.036875979   | 6.966441469 |             | Tmem218                                                    | transmembrane prc membrane /// integr         | full-length |                |
|--------------------|--------------|--------------|---------------|--------------|--------------|---------------|-------------|-------------|------------------------------------------------------------|-----------------------------------------------|-------------|----------------|
| 10584628           | 1.520712284  | 3.806357442  | 0.382696148   | -8.841564515 | 1.61002456   | 4.008474308   | 6.698572593 | Cluster I   | Thy1                                                       | thymus cell antigen angiogenesis /// pla      | full-length |                |
| 10584634           | 0.485342848  | -6.746328365 | 0.092083336   | -6.372297993 | 1.982067339  | -1.768627673  | 7.158435914 |             | Usp2                                                       | ubiquitin specific pe ubiquitin thiolester    | full-length |                |
| 10584674           | 1.221922053  | 5.19540903   | -0.153054869  | -5.85535902  | 1.181556338  | 4.400808769   | 7.547774796 |             | Mcam                                                       | melanoma cell adh protein binding /// p       | full-length |                |
| 10584787           | 0.904677482  | -5.817492058 | 0.166290952   | -6.33813466  | 1.705408089  | -3.356615122  | 5.59374359  |             | Treh                                                       | trehalase (brush-bc alpha,alpha-trehala       | full-length |                |
| 10584821           | 1.443063802  | 2.867208652  | 0.003480746   | -6.391656128 | 1.590938443  | 3.488283413   | 5.454738536 | Cluster I   | Cd3d                                                       | CD3 antigen, delta receptor activity /// t    | full-length |                |
| 10585276           | 1.46357122   | 6.525526381  | 0.003646418   | -6.391511158 | 1.642884787  | 7.433198817   | 6.177629544 |             | Pou2af1                                                    | POU domain, class DNA binding /// pro         | full-length |                |
| 10585331           | -0.664898554 | -1.739176038 | -0.327581749  | -4.622016821 | -1.228916275 | 3.582868655   | 5.508108427 |             | Exp5                                                       | exophilin 5 protein binding /// c             | full-length |                |
| 10585467           | -0.631083144 | -3.232791509 | -0.230129491  | -5.709152998 | -1.649581456 | 4.978295451   | 8.586940969 |             | C630028N24Rik                                              | RIKEN cDNA C630 cytoplasm /// kinase          | full-length |                |
| 10585555           | 1.065143891  | 3.719904493  | -0.045379804  | -6.342539867 | 0.974896806  | 2.385931335   | 5.726911091 | Cluster III | Pstpip1                                                    | proline-serine-threc cytokinesis /// stres    | full-length |                |
| 10585699           | -0.015406095 | -7.279563877 | -0.286137044  | -6.249445561 | -1.760242463 | -3.474400242  | 7.313333192 |             | Fabp5                                                      | fatty acid binding pr transporter activity ,  | full-length |                |
| 10585932           | 2.11538302   | 11.25623822  | 0.171432219   | -5.762362661 | 2.266552922  | 11.66160735   | 8.401558094 |             | Pkm2                                                       | pyruvate kinase, m magnesium ion bin          | full-length |                |
| 10585956           | 1.62005939   | 0.80805939   | -0.247381889  | -6.04466064  | 1.264457099  | -1.655579774  | 5.997082669 |             | ---                                                        | ---                                           | partial     |                |
| 10585970           | 1.6398608    | 3.084281195  | 0.325493824   | -5.503952756 | 1.555845928  | 2.141892749   | 7.198381975 |             | ---                                                        | ---                                           | partial     |                |
| 10585972           | 1.408902632  | -0.075941997 | 0.000699054   | -6.391787869 | 1.388663586  | -0.550693098  | 5.683544686 |             | ---                                                        | ---                                           | partial     |                |
| 10585974           | 1.768309339  | 2.407438962  | 0.491673121   | -4.931884511 | 1.874293025  | 2.605759066   | 5.514269818 |             | ---                                                        | ---                                           | partial     |                |
| 10585976           | 1.476646777  | 0.589578284  | 0.082792926   | -6.346075173 | 1.334115339  | -0.6645658    | 5.982576166 |             | ---                                                        | ---                                           | partial     |                |
| 10585978           | 1.15660176   | -1.162714526 | 0.252165925   | -5.944981638 | 0.974799579  | -2.726063407  | 5.441697123 |             | ---                                                        | ---                                           | partial     |                |
| 10585980           | 1.178632391  | 0.391971766  | -0.105991278  | -6.279718113 | 1.036783586  | -1.065134839  | 4.939331813 |             | ---                                                        | ---                                           | partial     |                |
| 10585982           | 1.767472613  | 1.817051336  | 0.461710107   | -5.219018557 | 1.743954683  | 1.300412082   | 6.724500364 |             | ---                                                        | ---                                           | partial     |                |
| 10585986           | 1.663494069  | 2.93374179   | 0.172558536   | -6.144004239 | 1.436132852  | 1.070486461   | 6.695883966 |             | ---                                                        | ---                                           | partial     |                |
| 10585988           | 1.460649028  | 2.597696769  | 0.049954082   | -6.366110446 | 1.315756934  | 1.166878296   | 6.476252894 |             | ---                                                        | ---                                           | partial     |                |
| 10585990           | 1.328506137  | 1.457195247  | -0.06986571   | -6.343518407 | 1.136434334  | -0.350058304  | 6.739393638 |             | ---                                                        | ---                                           | ---         |                |
| 10585992           | 1.550959979  | 1.826181674  | 0.038216283   | -6.380335099 | 1.499847097  | 1.115253644   | 6.257063528 |             | Myo9a                                                      | myosin IXa nucleotide binding /               | partial     |                |
| 10586448           | 3.20401101   | 6.613024551  | 0.59256279    | -4.990493443 | 2.903237993  | 5.065572295   | 6.232502426 |             | 2810417H13Rik                                              | RIKEN cDNA 2810 nucleus /// mitochor          | full-length |                |
| 10586744           | 1.816520889  | 10.68801248  | -0.042204085  | -6.344283063 | 1.757269528  | 9.864861444   | 7.85565497  |             | Anxa2                                                      | annexin A2 angiogenesis /// str               | full-length |                |
| 10586863           | -0.488662795 | -6.097090524 | -0.825587163  | -3.532697959 | -1.076411999 | -3.117384936  | 6.217143022 |             | LOC280487                                                  | pol polyprotein                               | partial     |                |
| Affymatrix ID      | BS/Non Inf.  | LS/Non Inf.  | ReIN/Non Inf. | Average      | Cluster      | Gene          | Gene        | Gene        | Ontology (GC)                                              | Transcript                                    |             |                |
| Transcript Cluster | logFC        | B            | logFC         | B            | logFC        | B             | expression  | Number      | Symbol                                                     | Title                                         | Description | Classification |
| 10587077           | -1.857341369 | 4.227483312  | -0.628483225  | -3.647475521 | -2.345978358 | 6.423511955   | 6.717095775 | Cluster IX  | Onecut1                                                    | one cut domain, far liver development //      | full-length | full-length    |
| 10587082           | -2.086301328 | -0.444605055 | -1.265734776  | -3.127503402 | -1.552078566 | -2.97658102   | 7.460401236 | Cluster IX  | Onecut1                                                    | one cut domain, far liver development //      | full-length | full-length    |
| 10587107           | 0.958353112  | 2.636334161  | 0.06733435    | -6.283286413 | 1.313788341  | 5.645483336   | 5.094367191 |             | Myo5a                                                      | myosin Va microfilament moto                  | full-length | full-length    |
| 10587284           | -0.193755905 | -7.110517737 | 0.075143704   | -6.366629432 | -1.747058466 | -0.0862110897 | 11.81302496 | Cluster X   | Elov5                                                      | ELOVL family mem endoplasmic reticul          | full-length | full-length    |
| 10587323           | 0.560706733  | -2.168773762 | -0.199769468  | -5.507404468 | 1.160016816  | 4.170450425   | 10.55981074 |             | Gsta1 /// Gsta2 /// Eglutathione S-transf                  | glutathione transfer                          | full-length | full-length    |
| 10587331           | 0.564292247  | -2.094186866 | -0.183814667  | -5.629660793 | 1.151686627  | 4.1353949     | 10.50164458 |             | Gsta1 /// Gsta2 /// Eglutathione S-transf                  | glutathione transfer                          | full-length | full-length    |
| 10587339           | 0.470591597  | -3.784622356 | -0.181016217  | -5.761893042 | 1.087496305  | 2.620335511   | 10.23057276 |             | Gsta1 /// Gsta2 /// Eglutathione S-transf                  | glutathione transfer                          | full-length | full-length    |
| 10587683           | 2.113804778  | 11.96069987  | 0.202084703   | -5.431345705 | 2.579828647  | 13.92517008   | 5.847751887 | Cluster VI  | Bcl2a1a /// Bcl2a1b B-cell leukemia/lym B cell homeostasis |                                               | full-length | full-length    |
| 10587690           | 1.693747441  | 10.56698699  | 0.093438521   | -6.124508871 | 2.224635615  | 13.40609814   | 5.860841243 |             | Bcl2a1a /// Bcl2a1b B-cell leukemia/lym B cell homeostasis |                                               | full-length | full-length    |
| 10587792           | 0.587952065  | -0.730558264 | -0.132895302  | -5.861615827 | 1.01181343   | 4.182024136   | 9.303039621 | Cluster IV  | Plscr1                                                     | phospholipid scram calcium ion binding        | full-length | full-length    |
| 10587871           | -0.601586956 | -4.197567195 | -0.032147527  | -6.38090548  | -1.236609233 | 0.68311506    | 10.27198573 |             | Pagr9                                                      | progesterin and adipc receptor activity /// i | full-length | full-length    |
| 10588479           | 0.872329847  | 2.464739828  | 0.266863299   | -6.464705145 | 1.011245986  | 3.608013346   | 5.845226262 | Cluster II  | Tlr9                                                       | toll-like receptor 9 receptor activity /// i  | full-length | full-length    |
| 10588577           | -1.104097352 | -0.897488473 | -0.960635901  | -1.275700278 | -0.312196457 | -6.583992686  | 7.097158297 |             | Cish                                                       | cytokine inducible ξ regulation of cell gr    | full-length | full-length    |
| 10588691           | -0.60355476  | -2.673100803 | 0.210482693   | -5.651064739 | -1.006267549 | 1.19076628    | 8.536694605 |             | Hyal1                                                      | hyaluronoglucosam catalytic activity /// t    | full-length | full-length    |
| 10588883           | -0.717394298 | 3.834761337  | -0.120684815  | -5.648804359 | -1.189243277 | 9.189144141   | 9.623753513 | Cluster X   | Amt                                                        | aminomethyltransfe aminomethyltransfe         | full-length | full-length    |
| 10589350           | 1.011792171  | 9.355506537  | 0.621217154   | 4.063258276  | 1.088344429  | 9.793164094   | 9.250151899 |             | Shisa5                                                     | shisa homolog 5 (X nucleus /// nuclear c      | full-length | full-length    |
| 10589511           | -0.355154471 | -3.882172103 | 0.045332332   | -6.321899272 | -1.019988257 | 4.760066063   | 9.265309811 | Cluster X   | Scap                                                       | SREBF chaperone protein binding /// p         | full-length | full-length    |
| 10589535           | 1.096511574  | 6.964250895  | 0.126979899   | -5.770363446 | 0.559308871  | -0.405660184  | 4.385120426 |             | Ngp                                                        | neutrophilic granule molecular_function       | full-length | full-length    |
| 10589884           | 1.504106887  | 1.171513024  | 0.187280086   | -6.111669164 | 1.505568063  | 1.339914705   | 4.892258091 |             | Bcl2a1c                                                    | B-cell leukemia/lym apoptosis                 | full-length | full-length    |
| 10589974           | -0.488662795 | -6.097090524 | -0.825587163  | -3.532697959 | -1.076411999 | -3.117384936  | 6.217143022 |             | 100043821 /// 1000 predicted gene, 100                     | ---                                           | est         | ---            |
| 10590365           | -1.112052635 | 6.956953342  | -0.292259408  | -3.693227733 | -1.610874853 | 10.90884318   | 7.11945231  |             | Vipr1                                                      | vasoactive intestine signal transducer a      | full-length | full-length    |
| 10590381           | -0.815495504 | 2.730762244  | -0.196894068  | -5.194362567 | -1.050333028 | 5.045949646   | 6.805033857 |             | Vipr1                                                      | vasoactive intestine signal transducer a      | full-length | full-length    |
| 10590438           | -1.309109412 | 0.459072038  | -0.181870862  | -6.123635421 | -2.091103501 | 4.856158601   | 6.056554873 |             | C730027P07Rik                                              | RIKEN cDNA C730 extracellular region          | full-length | full-length    |
| 10590494           | 1.460783429  | 3.428239502  | 0.056091493   | -6.353879394 | 0.98866721   | -0.700054324  | 5.024740685 |             | Kif15                                                      | kinesin family mem nucleotide binding /       | full-length | full-length    |
| 10590631           | 2.555080759  | 10.22388559  | -0.227377469  | -5.754057726 | 2.350490552  | 8.800780332   | 5.939069689 | Cluster VI  | Ccr2                                                       | chemokine (C-C m) signal transducer a         | full-length | full-length    |
| 10590635           | 1.9159098    | 10.11404502  | -0.278271725  | -4.841580237 | 1.941415595  | 9.842923739   | 7.409304466 |             | Ccr5                                                       | chemokine (C-C m) signal transducer a         | full-length | full-length    |
| 10590844           | -0.904960351 | 3.772062842  | -0.238041793  | -4.724810176 | -1.038283567 | 4.857407495   | 9.378083354 |             | 9030420J04Rik                                              | RIKEN cDNA 9030 ---                           | full-length | full-length    |

| 10590860           | -0.864870202 | 2.443384819  | -0.060733054 | -6.28737327  | -1.005998032  | 3.621912266  | 8.465370604 | 9030420J04Rik | RIKEN cDNA 9030 ---                                             | full-length                                   |                       |                |
|--------------------|--------------|--------------|--------------|--------------|---------------|--------------|-------------|---------------|-----------------------------------------------------------------|-----------------------------------------------|-----------------------|----------------|
| 10591773           | 1.239993481  | 6.103303693  | 0.158689824  | -5.740079088 | -1.002234508  | 3.331654332  | 9.406909534 | Hmgn2         | high mobility group chromatin /// DNA b                         | full-length                                   |                       |                |
| 10591781           | 1.866435709  | 2.332913984  | 0.054320821  | -6.374120949 | 0.771347804   | -4.573352898 | 5.06924241  | Anln          | anillin, actin binding cytokinesis /// actin                    | full-length                                   |                       |                |
| 10592067           | 1.144100049  | 0.986816435  | -0.084938827 | -6.304820975 | 0.706985295   | -3.148222273 | 7.472838342 | Fli1          | Friend leukemia int DNA binding /// trar                        | full-length                                   |                       |                |
| 10592201           | 0.949853886  | -0.309837415 | -0.129334847 | -6.174142216 | 1.168349401   | 1.223832557  | 5.093078598 | Chek1         | checkpoint kinase 1 DNA damage checl                            | full-length                                   |                       |                |
| 10592515           | 1.07161533   | 2.833704008  | -0.275143323 | -5.028764409 | 1.189275012   | 3.524586088  | 6.086010422 | Ubash3b       | ubiquitin associatc nucleus /// cytoplas                        | full-length                                   |                       |                |
| 10592535           | 1.017370632  | 5.635823152  | 0.011872693  | -6.386541775 | 1.321741263   | 8.233092608  | 6.17404018  | Sorl1         | sorilin-related rece receptor activity /// l                    | full-length                                   |                       |                |
| 10592734           | 1.153962071  | 3.426954201  | 0.317298224  | -4.689205932 | 1.297221529   | 4.275219372  | 7.170514512 | Cbl           | Casitas B-lineage h signal transducer a                         | full-length                                   |                       |                |
| 10593015           | 3.014608224  | 15.62493976  | 0.257166531  | -5.011064887 | 3.054704404   | 15.41322081  | 6.740589291 | Cd3g          | CD3 antigen, gmn receptor activity /// t                        | full-length                                   |                       |                |
| 10593024           | 1.662642464  | 10.40307918  | 0.337998876  | -3.531891228 | 1.631219098   | 9.747135514  | 6.406061801 | Cluster I     | CD3 antigen, epslc immunological sync                           | full-length                                   |                       |                |
| 10593050           | 1.560310176  | 9.482709168  | -0.019791665 | -6.379780658 | 1.470962961   | 8.35189499   | 6.431904833 | Il10ra        | interleukin 10 recep receptor activity /// r                    | full-length                                   |                       |                |
| 10593123           | 1.11296738   | -0.125857871 | -0.046221357 | -6.370347832 | 0.931744765   | -1.902624577 | 7.076061326 | Tagln         | transgelin cytoplasm /// cytosk                                 | full-length                                   |                       |                |
| 10593198           | -1.00211678  | 0.276048855  | -0.178470018 | -5.973424221 | -1.102954644  | 0.794434027  | 7.819183718 | Fam55b        | family with sequenc ---                                         | full-length                                   |                       |                |
| 10593219           | 0.666527554  | -5.629420569 | 0.02353454   | -6.389515081 | 1.319612949   | -2.609377186 | 9.593443895 | Nnmt          | nicotinamide N-met cytoplasm /// nicotir                        | full-length                                   |                       |                |
| 10593332           | -0.63607921  | -0.513362526 | -0.008947177 | -6.389538422 | -1.510326579  | 8.152316221  | 8.24546996  | Cluster X     | Bco2 beta-carotene oxyg iron ion binding /// i                  | full-length                                   |                       |                |
| 10593776           | 1.333150064  | -4.680644435 | 0.09516658   | -6.376032097 | 2.872558823   | 0.156877688  | 6.80627797  | Nrg4          | neuregulin 4 extracellular region                               | full-length                                   |                       |                |
| 10594251           | 2.073804861  | 3.679913011  | 0.291994411  | -5.876923031 | 1.550656314   | 0.385059722  | 5.952961445 | Kif23         | kinesin family mem nucleotide binding /                         | full-length                                   |                       |                |
| 10594426           | 1.125948016  | 2.021160026  | 0.065956951  | -6.324752013 | 0.96114853    | 0.136310047  | 4.701121671 | Cluster III   | Zwilch, kinetochore kinetochore /// mole                        | full-length                                   |                       |                |
| 10594540           | 1.524446666  | 10.5511892   | -0.15063484  | -5.572880243 | 1.771546028   | 11.92552771  | 7.107017195 | Plekho2       | pleckstrin homology ---                                         | full-length                                   |                       |                |
| 10594645           | 1.582848021  | 9.279665923  | 0.008206193  | -6.389850625 | 1.602785643   | 8.996489915  | 8.323701767 | Rab8b         | RAB8B, member R nucleotide binding /                            | full-length                                   |                       |                |
| 10594774           | 1.466087193  | 5.663956329  | -0.078514389 | -6.281595826 | 0.734888916   | -1.485122457 | 6.203055383 | Cluster III   | Ccnb2 cyclin B2 in utero embryonic                              | full-length                                   |                       |                |
| 10594798           | 1.352648817  | -0.825177368 | 1.4836631    | 0.564021425  | 0.707374995   | -5.017369709 | 4.265582919 | ---           | ---                                                             | est                                           |                       |                |
| 10595148           | 0.448038371  | -4.191597849 | -0.225160449 | -5.491783568 | 1.122470639   | 2.646722838  | 10.34448914 | Cluster X     | Gsta1 /// Gsta2 /// Eglutathione S-transi glutathione transfer  | full-length                                   |                       |                |
| 10595480           | -0.732382103 | -3.155815129 | -0.0428403   | -6.372819131 | -1.343804567  | 1.390286124  | 11.19179137 | Me1           | malic enzyme 1, N/ catalytic activity /// r                     | full-length                                   |                       |                |
| 10595633           | 1.826881323  | 10.77219643  | 0.154169072  | -5.762541958 | 2.348422238   | 13.35501925  | 6.628729039 | Cluster X     | Bcl2a1a /// Bcl2a1b B-cell leukemia/lym B cell homeostasis      | full-length                                   |                       |                |
| 10597239           | -0.5838209   | -5.213036196 | -0.067480123 | -6.360318669 | -1.101684094  | -2.040243395 | 7.108688951 | Pth1r         | parathyroid hormon skeletal developme                           | full-length                                   |                       |                |
| 10597258           | -0.238565645 | -5.260245793 | 0.06337906   | -6.231524825 | -1.120080883  | 6.769709548  | 7.348380142 | Tmie          | transmembrane inn sensory perception                            | full-length                                   |                       |                |
| 10597279           | 0.875481751  | -1.930433223 | 0.180340355  | -6.062010866 | 1.035350108   | -0.940104584 | 6.636806527 | Ccr12         | chemokine (C-C m) signal transducer a                           | full-length                                   |                       |                |
| 10597461           | 1.273547417  | 9.427617421  | 0.103761688  | -5.918210871 | 1.365242481   | 9.825119252  | 6.417640539 | Cmrm7         | CKLF-like MARVEL cytokine activity /// r                        | full-length                                   |                       |                |
| 10597592           | -1.794214656 | -3.534871712 | -0.082467267 | -6.381470342 | -3.036118043  | 0.037979568  | 10.22115761 | Acaa1b        | acetyl-Coenzyme A ---                                           | full-length                                   |                       |                |
| 10597648           | 0.562269729  | -1.734812423 | 0.098631588  | -6.138261639 | 1.009189258   | 3.276376293  | 8.832675135 | Cluster IV    | Myd88 myeloid differentiati response to molecu                  | full-length                                   |                       |                |
| 10597743           | 1.146003705  | -0.230650522 | -0.136783048 | -6.220858457 | 0.869636254   | -2.683689674 | 6.298475147 | Cx3cr1        | chemokine (C-X3-C signal transducer a                           | full-length                                   |                       |                |
| 10598004           | 1.140055244  | -1.658488077 | 0.337932586  | -5.67929761  | 1.47575061    | 0.154090193  | 3.605482505 | Cluster IV    | Ccr3 chemokine (C-C m) signal transducer a                      | full-length                                   |                       |                |
| 10598013           | 1.9159098    | 10.11404502  | -0.278271725 | -4.841580237 | 1.941415595   | 9.842923739  | 7.409304466 | Ccr5          | chemokine (C-C m) signal transducer a                           | full-length                                   |                       |                |
| 10598057           | -1.599678722 | 3.16099454   | -0.27873557  | -5.687349679 | -1.077285705  | -0.952417706 | 6.584171712 | ---           | ---                                                             | full-length                                   |                       |                |
| 10598175           | 1.84724539   | 6.089206942  | -0.009494922 | -6.39068755  | 1.639207706   | 4.326945456  | 6.166346746 | ---           | ---                                                             | full-length                                   |                       |                |
| 10598612           | -0.755430343 | 1.492499399  | -0.113009677 | -6.008477602 | -1.194278095  | 5.970543829  | 10.93510976 | Cluster X     | Ear2 /// Ear1 /// Ear3 eosinophil-associat nucleic acid binding | full-length                                   |                       |                |
|                    |              |              |              |              |               |              |             | Otc           | ornithine transcarb: urea cycle /// ornith                      | full-length                                   |                       |                |
| Affymetrix ID      | BS/Non Inf.  |              | LS/Non Inf.  |              | ReIN/Non Inf. |              | Average     | Cluster       | Gene                                                            | Gene                                          | Gene Ontology (GC     | Transcript     |
| Transcript Cluster | logFC        | B            | logFC        | B            | logFC         | B            | expression  | Number        | Symbol                                                          | Title                                         | Description           | Classification |
| 10598863           | -0.620642586 | -5.107383221 | 0.003554391  | -6.391708884 | -1.010671297  | -2.86101392  | 11.80786913 |               | Rgn                                                             | regucalcin                                    | calcium ion binding   | full-length    |
| 10599120           | 1.941700448  | 10.24234074  | 0.15949635   | -5.842908838 | 2.058497896   | 10.51298076  | 6.429167252 |               | Dock11                                                          | dedicator of cytokin guanyl-nucleotide e      | full-length           |                |
| 10599487           | 1.140980011  | 7.301257995  | 0.042383631  | -6.321039046 | 0.986487009   | 5.206794859  | 6.140603316 |               | Sash3                                                           | SAM and SH3 dom positive regulation (         | full-length           |                |
| 10600122           | -1.433929497 | 1.63614647   | -0.442214999 | -4.86095387  | -0.825105621  | -3.173530517 | 4.639575726 |               | Xlr3b /// Xlr3a /// Xlr                                         | X-linked lymphocyt ---                        | full-length           |                |
| 10600836           | 2.136234111  | 12.59448237  | 0.138642485  | -5.881471936 | 2.332296741   | 13.23373327  | 9.421055792 |               | Msn                                                             | moesin                                        | uropod /// binding // | full-length    |
| 10600852           | 1.442165658  | 5.794775752  | 0.395830323  | -3.939065263 | 1.539670331   | 6.110978795  | 5.544133758 |               | ---                                                             | ---                                           | full-length           |                |
| 10601011           | 1.346304961  | 3.363619533  | -0.196105956 | -5.872700832 | 0.923780892   | -0.635525602 | 4.186452861 |               | Kif4                                                            | kinesin family mem nucleotide binding /       | full-length           |                |
| 10601303           | -0.442696009 | -5.05645191  | -0.319724382 | -5.17330785  | -1.130519668  | 0.869003     | 4.980927194 |               | Chic1                                                           | cysteine-rich hydroj molecular_function       | full-length           |                |
| 10601312           | -0.407471925 | -6.206780863 | 0.154067342  | -6.23139807  | -1.469494271  | 0.280799559  | 6.190381414 |               | ENSMUSG000000                                                   | predicted gene, EN ---                        | est                   |                |
| 10601385           | 2.694283129  | 11.03530586  | 0.071150649  | -6.324494055 | 2.806677966   | 11.10123819  | 7.145522504 |               | Tlr13                                                           | toll-like receptor 13 receptor activity /// r | full-length           |                |
| 10601421           | 1.799506357  | 5.993778379  | 0.018485336  | -6.387458198 | 1.849144787   | 5.874800985  | 5.263667464 |               | A630033H20Rik                                                   | RIKEN cDNA A630 signal transducer a           | full-length           |                |
| 10601581           | 0.802288959  | 3.558902322  | 1.051126547  | 6.486161121  | 1.096507068   | 6.61792581   | 7.464083813 |               | EG245575                                                        | predicted gene, EG ---                        | est                   |                |
| 10601705           | 1.086159009  | 2.742681497  | 0.205352506  | -5.629835031 | 0.719584968   | -1.407555969 | 4.282998783 |               | Cenpi                                                           | centromere protein chromosome, centr          | full-length           |                |
| 10601878           | -0.709635844 | -2.549617074 | -0.353856984 | -4.911205941 | -1.076736512  | 0.475026556  | 4.664689074 |               | Tceal1                                                          | transcription elong translation elongati      | full-length           |                |
| 10602372           | -1.90465327  | 3.104168308  | -0.055860154 | -6.370963753 | -2.861078779  | 7.215786728  | 9.087483377 |               | Alas2                                                           | aminolevulinic acid catalytic activity /// t  | full-length           |                |
| 10602739           | 1.268880384  | 8.739230733  | -0.00244091  | -6.391547131 | 1.340352794   | 8.955886174  | 7.546610259 |               | Acof9                                                           | acyl-CoA thioester: carboxylesterase a        | full-length           |                |
| 10602840           | 1.415497323  | 8.07369547   | -0.296345381 | -4.223525112 | 1.48752649    | 8.224603928  | 6.538639347 |               | Sh3kbp1                                                         | SH3-domain kinase protein binding /// c       | full-length           |                |



|          |              |              |              |              |              |              |             |                         |                       |                          |             |
|----------|--------------|--------------|--------------|--------------|--------------|--------------|-------------|-------------------------|-----------------------|--------------------------|-------------|
| 10603023 | 1.057906314  | 1.700075709  | 0.061298604  | -6.330275379 | 1.227667931  | 2.814427958  | 6.284787024 | ---                     | ---                   | ---                      | est         |
| 10603051 | 2.10574055   | 7.274987604  | 0.150832869  | -6.133690305 | 2.003895529  | 6.270591571  | 5.839276754 | Ap1s2                   | adaptor-related pro   | protein binding /// C    | full-length |
| 10603182 | -0.626070906 | -2.979360399 | -0.189427885 | -5.875210866 | -1.005667151 | 0.398140376  | 5.556964725 | Arhgap6                 | Rho GTPase activa     | GTPase activator a       | full-length |
| 10603346 | 1.640935018  | 6.844658767  | 0.034848028  | -6.370337649 | 1.662839771  | 6.566217795  | 7.047096878 | Plp2                    | proteolipid protein   | z membrane /// integri   | full-length |
| 10603469 | 1.75129656   | 1.447138507  | 0.049058673  | -6.378086038 | 2.027444229  | 2.522249632  | 10.09729143 | Rbm3                    | RNA binding motif     | † nucleotide binding /   | full-length |
| 10603549 | -0.488662795 | -6.097090524 | -0.825587163 | -3.532697959 | -1.076411999 | -3.117384936 | 6.217143022 | 100043821 /// 1000      | predicted gene, 10(   | ---                      | est         |
| 10603551 | 2.348410859  | 15.4206588   | 0.313929435  | -3.503557037 | 2.644555768  | 16.43050597  | 9.96949981  | Cybb                    | cytochrome b-245,     | ion channel activity     | full-length |
| 10603803 | -0.488662795 | -6.097090524 | -0.825587163 | -3.532697959 | -1.076411999 | -3.117384936 | 6.217143022 | LOC280487               | pol polyprotein       | ---                      | partial     |
| 10603860 | 1.572862994  | 9.656322094  | 0.201149425  | -5.24243163  | 1.463783018  | 8.372273592  | 9.327615765 | Cfp                     | complement factor     | extracellular region     | full-length |
| 10604393 | 1.606692364  | 5.730692578  | -0.152180488 | -6.049258987 | 1.642357438  | 5.551785659  | 5.86890507  | ENSMUSG000000           | predicted gene, EN    | ---                      | full-length |
| 10604713 | 1.241563186  | 3.506204625  | -0.035081777 | -6.370930816 | 1.050292755  | 1.398835748  | 5.87872755  | Arhgef6                 | Rac/Cdc42 guaninε     | molecular_function       | full-length |
| 10604763 | 1.348731927  | 8.787998136  | 0.036211512  | -6.34407391  | 1.307431851  | 7.988151547  | 9.612194625 | Arpc1b                  | actin related proteir | actin binding /// cytc   | full-length |
| 10604922 | 0.385023417  | -3.821399984 | -0.089895268 | -6.155659675 | 1.005127728  | 3.83829998   | 9.092456637 | BC023829                | cDNA sequence BC      | ---                      | full-length |
| 10604996 | -1.590028689 | 1.215820492  | -0.501952069 | -4.914214493 | -0.913800389 | -3.443114576 | 4.93450208  | Xlr3a /// Xlr3b /// Xlr | X-linked lymphocyt    | ---                      | full-length |
| 10605007 | -1.351500699 | 0.938373702  | -0.545731625 | -4.234562836 | -0.74137891  | -3.871771558 | 4.788588524 | Xlr3b /// Xlr3a /// Xlr | X-linked lymphocyt    | ---                      | full-length |
| 10605256 | 1.967516635  | 10.18583129  | -0.298403805 | -4.700466366 | 2.116546905  | 10.63107294  | 8.841183335 | Flna                    | filamin, alpha        | actin binding /// pro    | full-length |
| 10605338 | 2.151634022  | 11.68565898  | -0.00315093  | -6.391558935 | 2.091145993  | 10.92398439  | 8.250294662 | G6pdx                   | glucose-6-phospha     | cytokine production      | full-length |
| 10605392 | -0.9406814   | -1.447558895 | 0.168971364  | -6.105996026 | -1.231568053 | 0.507698279  | 7.95645788  | F8                      | coagulation factor \  | copper ion binding ,     | full-length |
| 10605465 | 0.766916155  | 1.073383087  | -0.048400134 | -6.327675598 | 1.092092932  | 4.312824434  | 7.419095524 | Prkx                    | protein kinase, X-lir | nucleotide binding /     | full-length |
| 10605711 | 1.358617225  | 4.318155759  | -0.221156598 | -5.632267613 | 1.522300563  | 5.155943257  | 5.349618038 | Pdk3                    | pyruvate dehydrogε    | two-component ser        | full-length |
| 10606016 | 3.007203022  | 15.68104904  | -0.048056134 | -6.337447836 | 3.151624743  | 15.86242894  | 8.451119842 | Il2rg                   | interleukin 2 recept  | receptor activity /// l  | full-length |
| 10606058 | 1.829297628  | 10.41515309  | 0.00704491   | -6.390494702 | 1.82537758   | 9.961725969  | 6.904253681 | Cxcr3                   | chemokine (C-X-C      | signal transducer a      | full-length |
| 10606389 | 1.29246205   | -1.715605831 | 0.325276788  | -5.877856046 | 1.070140116  | -3.291557057 | 6.547321226 | Gm379                   | gene model 379, (f    | ---                      | predicted   |
| 10606609 | 1.094145054  | -2.640633085 | -0.271722069 | -6.001873049 | 0.542342422  | -5.954910103 | 5.147382982 | Tspan6                  | tetraspanin 6         | membrane /// integri     | full-length |
| 10606694 | 1.353600518  | 7.960271777  | -0.135923326 | -5.834549067 | 1.406457587  | 7.976947413  | 5.619798995 | Btk                     | Bruton agammaglo      | nucleotide binding /     | full-length |
| 10606714 | 0.870023297  | 1.879252839  | 0.139390648  | -5.919537435 | 1.04836931   | 3.401492535  | 7.600325744 | Gla                     | galactosidase, alph   | catalytic activity /// † | full-length |
| 10607429 | -0.488662795 | -6.097090524 | -0.825587163 | -3.532697959 | -1.076411999 | -3.117384936 | 6.217143022 | LOC280487               | pol polyprotein       | ---                      | partial     |
| 10607865 | 2.261002621  | 10.69651563  | 0.099544895  | -6.216558988 | 2.110968857  | 9.449428899  | 10.05651212 | Tmsb4x                  | thymosin, beta 4, X   | actin binding /// pro    | full-length |
| 10607868 | 1.467902197  | 8.79670545   | 0.305383041  | -4.012898471 | 1.142536438  | 5.459812405  | 5.577972487 | Tlr8                    | toll-like receptor 8  | receptor activity /// †  | full-length |
| 10607870 | 1.249120355  | 5.951246017  | 0.265667492  | -4.770377685 | 1.397622577  | 6.810227315  | 5.68741911  | Tlr7                    | toll-like receptor 7  | single-stranded RN       | full-length |
